# Supplementary material for: A lipidomic study on the lens epithelial cells of patients with age related cataracts
Source: PeerJ. 2024 Sep 6;12:e17998. doi: 10.7717/peerj.17998 (PMC11382648; doi:10.7717/peerj.17998)
Supplement: Supplemental Information 1 [file peerj-12-17998-s001.xlsx]

## Sheet: file explanation
表头名称	描述
id	该物质在本次定性分析中的唯一数据编号
LipidName	脂质名字
LipidIon	定性匹配分析得到的脂质脂质离子
LipidGroup	确定的脂类。脂类是根据总脂肪酸碳数和不饱和数(总和组成)分组显示的脂类。如PC(16:0/18:2)+H脂类组:PC(34:2)+H
Class	脂质分类
FattyAcid	脂肪酸链
FA1	脂肪酸支链
FA2	脂肪酸支链
FA3	脂肪酸支链
ObsMz	峰值的测量质合比
RT	该物质的色谱保留时间
CalcMz	脂质离子的理论质合比
IonFormula	脂质离子的组成化学式
M1	M1样品相对定量值
M2	M2样品相对定量值
M3	M3样品相对定量值
M4	M4样品相对定量值
M5	M5样品相对定量值
M6	M6样品相对定量值
M7	M7样品相对定量值
M8	M8样品相对定量值
M9	M9样品相对定量值
M10	M10样品相对定量值
Mean M	M样本重复实验的相对定量值均值
MM1	MM1样品相对定量值
MM2	MM2样品相对定量值
MM3	MM3样品相对定量值
MM4	MM4样品相对定量值
MM5	MM5样品相对定量值
MM6	MM6样品相对定量值
MM7	MM7样品相对定量值
MM8	MM8样品相对定量值
MM9	MM9样品相对定量值
MM10	MM10样品相对定量值
Mean MM	MM样本重复实验的相对定量值均值
QC_1	QC_1样品相对定量值
QC_2	QC_2样品相对定量值
QC_3	QC_3样品相对定量值
Mean QC	QC样本重复实验的相对定量值均值

## Sheet: Mean
id	LipidName	LipidIon	LipidGroup	Class	FattyAcid	FA1	FA2	FA3	ObsMz	RT	CalcMz	IonFormula	M1	M2	M3	M4	M5	M6	M7	M8	M9	M10	Mean M	MM1	MM2	MM3	MM4	MM5	MM6	MM7	MM8	MM9	MM10	Mean MM	QC_1	QC_2	QC_3	Mean QC
1	BisMeLPA(10:0e)	BisMeLPA(10:0e)+H	BisMeLPA(10:0e)+H	BisMeLPA	(10:0e)	(10:0e)			341.209	4.054	341.209	C15 H34 O6 N0 P1	0.000147669	0.000244997	0.000144348	0.000200056	0.000231315	0.000217594	0.00012623	0.000120724	0.000148954	0.000287231	0.000186912	0.000132594	0.000188097	0.000231062	9.04646e-05	0.000158591	0.000110876	0.000224981	0.000141439	0.00031572	0.000313241	0.000190707	0.000158018	0.000216108	0.000184871	0.000186332
2	BisMeLPA(12:0e)	BisMeLPA(12:0e)+H	BisMeLPA(12:0e)+H	BisMeLPA	(12:0e)	(12:0e)			369.24	5.46	369.24	C17 H38 O6 N0 P1	0.000352186	0.000611478	0.000426571	0.000385236	0.000558999	0.000472858	0.000371372	0.000355238	0.000417137	0.000727669	0.000467874	0.000311018	0.000533672	0.000470742	0.000330959	0.000369547	0.000242384	0.000477103	0.000486931	0.000732852	0.000682229	0.000463744	0.000339194	0.000453853	0.000392145	0.000395064
3	BisMeLPA(12:0e)	BisMeLPA(12:0e)+H	BisMeLPA(12:0e)+H	BisMeLPA	(12:0e)	(12:0e)			369.24	5.704	369.24	C17 H38 O6 N0 P1	0.00671276	0.00894227	0.00804649	0.00720813	0.0100755	0.00907792	0.00670108	0.00614635	0.0076546	0.011189	0.0081754	0.00647219	0.00648614	0.00928044	0.00592769	0.00781523	0.00774374	0.00794704	0.00789304	0.0125799	0.0116865	0.00838319	0.00709558	0.00748923	0.00727699	0.00728727
4	BisMeLPA(14:0e)	BisMeLPA(14:0e)+H	BisMeLPA(14:0e)+H	BisMeLPA	(14:0e)	(14:0e)			397.271	7.315	397.271	C19 H42 O6 N0 P1	0.0103765	0.0174005	0.0103157	0.0140936	0.0175783	0.0163808	0.011035	0.0113004	0.0112891	0.0196123	0.0139382	0.00994791	0.00979919	0.0140623	0.00556886	0.0131317	0.0101784	0.0133588	0.0123899	0.0222129	0.0175808	0.0128231	0.00974917	0.0135938	0.0115231	0.011622
5	BisMeLPA(26:0)	BisMeLPA(26:0)+H	BisMeLPA(26:0)+H	BisMeLPA	(26:0)	(26:0)			579.438	12.222	579.438	C31 H64 O7 N0 P1	0.000650046	0.000578209	0.000758436	0.000470863	0.000615992	0.000558428	0.000434041	0.000407118	0.000846156	0.000801871	0.000612116	0.000832617	0.000478752	0.000957415	0.000661708	0.000715875	0.000665541	0.000450098	0.000548288	0.000681165	0.000755342	0.00067468	0.000597373	0.000767439	0.000675883	0.000680232
6	BisMeLPA(30:0)	BisMeLPA(30:0)+H	BisMeLPA(30:0)+H	BisMeLPA	(30:0)	(30:0)			635.501	11.046	635.501	C35 H72 O7 N0 P1	0.022776	0.0309804	0.0393054	0.000194221	0.000849512	0.000607534	0.000302165	0.0241715	0.000243657	0.00115048	0.0120581	0.0384725	0.0227966	0.00164823	0.000635948	0.000181568	0.0254855	0.000684436	0.00157755	0.00139064	0.000337784	0.00932107	0.00102456	0.000189228	0.000639076	0.000617622
7	BisMePA(16:1e)	BisMePA(16:1e)+Na	BisMePA(16:1e)+Na	BisMePA	(16:1e)	(16:1e)			459.248	1.385	459.248	C21 H41 O7 N0 P1 Na1	0.000692472	0.000454442	0.000957706	0.000283462	0.000599937	0.000451988	0.000273905	0.00041001	0.000821055	0.00090999	0.000585497	0.000619403	0.000517305	0.0005836	0.000696237	0.000751008	0.000594672	0.000595648	0.000417043	0.000757027	0.000786279	0.000631822	0.00058777	0.000918468	0.00074041	0.000748883
8	BisMePA(18:0/11:2)	BisMePA(18:0_11:2)+NH4	BisMePA(29:2)+NH4	BisMePA	(18:0_11:2)	(18:0)	(11:2)		648.46	12.537	648.46	C34 H67 O8 N1 P1	0.00352466	0.0136843	0.0154203	0.0506705	0.0134958	0.000702436	0.115667	0.184459	0.0407204	0.0223537	0.0460698	0.00282984	0.144551	0.0107174	0.196853	0.134759	0.197602	0.167234	0.181009	0.00432524	0.0599608	0.109984	0.0210629	0.000642796	0.0116385	0.0111147
9	BisMePA(20:5/12:3)	BisMePA(20:5_12:3)+Na	BisMePA(32:8)+Na	BisMePA	(20:5_12:3)	(20:5)	(12:3)		683.368	5.237	683.368	C37 H57 O8 N0 P1 Na1	0.000319927	0.00153209	2.66629e-05	0.00106766	0.00119428	0.00116629	0.00099134	0.00131459	0.000181318	0.00164338	0.000943753	2.21479e-05	0.0016146	0.000431755	0.000263582	0.00034457	0.000146994	0.00099232	0.000273286	0.00177025	0.00155648	0.000741599	0.000702951	0.000884545	0.000786776	0.000791424
10	BisMePA(19:0/18:2)	BisMePA(19:0_18:2)+NH4	BisMePA(37:2)+NH4	BisMePA	(19:0_18:2)	(19:0)	(18:2)		760.585	11.242	760.585	C42 H83 O8 N1 P1	0.02423	0.00777775	0.0135709	0.00907298	0.00390502	0.034542	0.0298578	0.000635812	0.033261	0.00405181	0.0160905	0.0243949	0.00346436	0.00762206	0.00373145	0.00338293	0.00421009	0.0028512	0.00197455	0.0235533	0.00207126	0.00772562	0.00806388	0.00966852	0.00880411	0.0088455
11	BisMePA(28:0/18:1)	BisMePA(28:0_18:1)+Na	BisMePA(46:1)+Na	BisMePA	(28:0_18:1)	(28:0)	(18:1)		893.697	11.443	893.697	C51 H99 O8 N0 P1 Na1	1.86336e-05	9.34735e-06	3.46612e-05	7.94845e-06	9.1514e-06	2.56789e-05	6.05163e-06	7.16122e-06	7.95542e-06	6.84833e-06	1.33438e-05	1.18886e-05	2.17054e-06	7.47444e-07	1.18791e-05	3.69165e-06	3.04665e-06	1.96795e-05	1.53552e-05	1.60018e-05	3.45652e-05	1.19026e-05	8.76843e-06	3.53435e-06	6.40457e-06	6.23578e-06
12	BisMePA(28:0/18:1)	BisMePA(28:0_18:1)+Na	BisMePA(46:1)+Na	BisMePA	(28:0_18:1)	(28:0)	(18:1)		893.697	12.069	893.697	C51 H99 O8 N0 P1 Na1	5.93195e-08	9.71434e-06	4.93862e-06	4.34549e-06	1.8744e-06	2.7111e-06	6.5086e-06	7.39353e-06	9.47684e-06	2.57862e-06	4.96009e-06	7.38295e-06	5.77633e-06	3.44455e-06	4.73623e-06	8.72073e-06	1.29971e-06	1.15317e-05	3.29772e-06	5.88829e-06	3.59232e-06	5.56705e-06	3.15337e-06	2.37329e-06	2.8452e-06	2.79062e-06
13	BisMePA(37:0/11:1)	BisMePA(37:0_11:1)+Na	BisMePA(48:1)+Na	BisMePA	(37:0_11:1)	(37:0)	(11:1)		921.728	11.261	921.728	C53 H103 O8 N0 P1 Na1	6.11865e-06	2.62528e-06	7.16846e-07	1.21243e-06	3.60389e-06	1.85637e-05	8.29898e-06	5.21504e-06	4.63336e-06	3.9525e-06	5.49407e-06	1.56435e-05	7.93135e-06	8.23073e-06	1.67826e-05	2.55059e-06	5.03761e-06	1.1531e-05	7.13934e-06	1.48984e-05	6.19044e-06	9.59355e-06	1.31697e-05	9.11021e-06	1.13477e-05	1.12092e-05
14	BisMePA(37:0/11:1)	BisMePA(37:0_11:1)+Na	BisMePA(48:1)+Na	BisMePA	(37:0_11:1)	(37:0)	(11:1)		921.728	11.562	921.728	C53 H103 O8 N0 P1 Na1	1.24157e-05	2.11974e-05	0.000245209	1.39203e-05	9.91747e-06	4.59713e-06	1.34269e-05	0.000756903	2.42195e-06	6.42503e-06	0.000108643	0.000932479	2.7727e-06	8.15226e-06	4.37067e-06	9.10439e-06	2.92174e-06	1.30636e-05	9.52497e-06	3.46535e-06	1.33753e-05	9.9923e-05	7.29113e-06	1.77834e-05	1.21848e-05	1.24198e-05
15	BisMePA(37:0/11:1)	BisMePA(37:0_11:1)+Na	BisMePA(48:1)+Na	BisMePA	(37:0_11:1)	(37:0)	(11:1)		921.728	11.674	921.728	C53 H103 O8 N0 P1 Na1	7.36119e-06	1.5568e-05	3.28822e-05	1.46662e-05	6.2027e-06	1.34843e-05	1.68243e-06	5.95889e-06	0.00111967	3.41509e-06	0.000122089	1.09905e-05	0.000622188	1.75415e-05	0.00107671	0.000744393	9.13667e-06	1.19811e-05	1.71758e-05	0.00108625	8.9588e-06	0.000360532	7.80817e-06	1.57216e-05	1.15118e-05	1.16805e-05
16	BisMePA(48:5)	BisMePA(48:5)+Na	BisMePA(48:5)+Na	BisMePA	(48:5)	(48:5)			913.666	11.444	913.666	C53 H95 O8 N0 P1 Na1	2.37277e-05	2.08056e-05	1.80297e-05	1.13779e-05	8.64385e-06	7.03036e-06	1.39089e-05	7.06881e-06	3.3403e-05	1.55441e-05	1.5954e-05	5.40021e-05	3.13702e-06	6.83577e-06	1.64202e-05	2.08326e-05	5.42421e-05	0.000100667	4.99461e-05	4.72661e-05	5.60068e-05	4.09356e-05	4.38636e-05	1.1442e-05	2.89516e-05	2.80857e-05
17	BisMePA(48:5)	BisMePA(48:5)+Na	BisMePA(48:5)+Na	BisMePA	(48:5)	(48:5)			913.666	11.85	913.666	C53 H95 O8 N0 P1 Na1	2.61981e-05	6.8198e-06	7.98485e-06	5.45384e-06	7.17778e-06	6.37072e-06	6.25723e-06	7.19854e-06	1.38426e-05	8.23931e-05	1.69696e-05	2.46464e-05	3.2489e-06	1.6993e-05	1.90606e-05	6.20331e-06	9.39126e-06	1.72055e-06	8.52441e-07	1.17268e-05	9.13778e-06	1.02981e-05	2.94044e-06	5.62776e-06	4.23244e-06	4.26688e-06
18	BisMePA(38:1/10:4)	BisMePA(38:1_10:4)+Na	BisMePA(48:5)+Na	BisMePA	(38:1_10:4)	(38:1)	(10:4)		913.666	13.133	913.666	C53 H95 O8 N0 P1 Na1	6.38868e-06	5.82401e-06	1.3179e-05	7.9557e-06	1.52308e-05	7.41279e-06	7.42981e-06	5.32319e-06	6.39375e-06	1.5164e-05	9.03018e-06	1.34544e-05	5.98723e-06	2.13419e-06	6.35439e-06	9.90164e-06	1.10604e-05	5.1391e-06	1.17509e-05	7.85244e-06	1.31559e-05	8.67906e-06	7.55171e-06	6.88465e-06	7.29551e-06	7.24396e-06
19	BisMePA(31:0/19:0)	BisMePA(31:0_19:0)+Na	BisMePA(50:0)+Na	BisMePA	(31:0_19:0)	(31:0)	(19:0)		951.775	12.175	951.775	C55 H109 O8 N0 P1 Na1	3.38023e-06	1.08335e-06	9.89497e-06	5.0328e-06	3.18594e-06	8.89431e-06	3.17024e-06	3.05154e-06	3.90313e-06	1.79901e-06	4.33955e-06	3.45448e-06	2.10588e-06	2.40031e-06	6.84004e-06	3.27936e-06	4.83594e-06	1.27826e-06	2.25006e-06	1.3256e-06	6.42699e-06	3.41969e-06	5.48675e-06	2.6144e-06	4.21293e-06	4.10469e-06
20	Cer(d12:0/16:0)	Cer(d12:0_16:0)+H	Cer(d28:0)+H	Cer	(d12:0_16:0)	(d12:0)	(16:0)		456.441	10.581	456.441	C28 H58 O3 N1	0.000615252	0.00222355	0.00193337	0.00115207	0.00123356	0.00122423	0.000913785	0.000862027	0.00151101	0.00165596	0.00133248	0.00128431	0.00101947	0.00247064	0.00078796	0.00122039	0.00083173	0.0010868	0.00107218	0.00229305	0.00245638	0.00145229	0.000771807	0.00229135	0.00147307	0.00151208
21	Cer(d12:0/18:0)	Cer(d12:0_18:0)+H	Cer(d30:0)+H	Cer	(d12:0_18:0)	(d12:0)	(18:0)		484.472	11.457	484.472	C30 H62 O3 N1	0.00231308	0.00422356	0.00365696	0.00244627	0.00234827	0.00208019	0.00156723	0.00161297	0.00322539	0.00323423	0.00267081	0.00277541	0.00196713	0.00327408	0.00137541	0.00213843	0.00153314	0.00208222	0.00186928	0.00423071	0.00451333	0.00257591	0.00400888	0.00434873	0.0041656	0.00417441
22	Cer(d15:2/18:2+2O)	Cer(d15:2_18:2+2O)+H	Cer(d33:4+2O)+H	Cer	(d15:2_18:2+2O)	(d15:2)	(18:2+2O)		550.447	7.295	550.447	C33 H60 O5 N1	0.000113155	0.000246077	0.000236876	0.000108426	0.000117161	9.71874e-05	6.34782e-05	7.55772e-05	0.000136515	0.000145184	0.000133964	0.000152885	9.29021e-05	0.000199382	6.82008e-05	8.09582e-05	8.83001e-05	8.15283e-05	0.000102624	0.000180314	0.000202819	0.000124991	0.000123534	0.000171658	0.000145789	0.000146994
23	Cer(d34:0)	Cer(d34:0)+H	Cer(d34:0)+H	Cer	(d34:0)	(d34:0)			540.535	5.078	540.535	C34 H70 O3 N1	1.28462e-05	3.38486e-06	2.24184e-05	1.11396e-05	4.9212e-07	3.99436e-06	2.11479e-06	2.24452e-06	6.92811e-06	1.00892e-05	7.56521e-06	2.20133e-05	1.38316e-06	1.33527e-05	7.8207e-06	9.50837e-06	5.51967e-06	9.09818e-07	9.2378e-06	3.9839e-06	3.12509e-05	1.0498e-05	2.57601e-05	1.42964e-05	2.05206e-05	2.01924e-05
24	Cer(d18:0/16:0)	Cer(d18:0_16:0)+H	Cer(d34:0)+H	Cer	(d18:0_16:0)	(d18:0)	(16:0)		540.535	11.825	540.535	C34 H70 O3 N1	7.23688e-06	5.6828e-06	3.63901e-06	7.42012e-06	3.85918e-06	1.31565e-05	1.37835e-05	7.55346e-06	1.42844e-05	4.54683e-06	8.11627e-06	9.58962e-05	1.22814e-05	3.91595e-06	3.76709e-06	6.25485e-05	2.35959e-06	4.27785e-05	3.37141e-06	0.000799882	2.41324e-05	0.000105093	3.86868e-05	5.16368e-05	4.47134e-05	4.50123e-05
25	Cer(d16:0/18:0)	Cer(d16:0_18:0)+H	Cer(d34:0)+H	Cer	(d16:0_18:0)	(d16:0)	(18:0)		540.535	13.402	540.535	C34 H70 O3 N1	0.00312333	0.00449102	0.00274636	0.00198047	0.00239398	0.0026394	0.00149394	0.00122718	0.00354911	0.00482335	0.00284681	0.00326919	0.00292822	0.00449774	0.00190836	0.00185961	0.00157075	0.00231731	0.00217426	0.00602431	0.006259	0.00328087	0.00297872	0.00508772	0.00395192	0.00400612
26	Cer(d16:0/18:0+O)	Cer(d16:0_18:0+O)+H	Cer(d34:0+O)+H	Cer	(d16:0_18:0+O)	(d16:0)	(18:0+O)		556.529	10.852	556.53	C34 H70 O4 N1	0.00103044	0.00142634	0.00132282	0.00158289	0.000735579	0.0025408	0.000447766	0.00165976	0.00145022	0.00226916	0.00144658	0.00108552	0.00131934	0.00198664	0.00296512	0.000986319	0.000946921	0.00186308	0.00126317	0.00100979	0.00185443	0.00152803	0.00161382	0.00168148	0.00164503	0.00164678
27	Cer(d14:2/21:2)	Cer(d14:2_21:2)+H	Cer(d35:4)+H	Cer	(d14:2_21:2)	(d14:2)	(21:2)		546.488	9.296	546.488	C35 H64 O3 N1	0.00633561	0.0069121	0.00792464	0.00667884	0.00829848	0.00637181	0.00446218	0.00440345	6.10696e-05	0.00691954	0.00583677	0.00572855	0.00580806	0.00697081	0.00823884	0.00486964	0.00451122	0.00438805	0.00375951	0.00610627	0.00463929	0.00550203	0.00556048	0.00663495	0.00605615	0.00608386
28	Cer(d35:4)	Cer(d35:4)+H	Cer(d35:4)+H	Cer	(d35:4)	(d35:4)			546.488	9.573	546.488	C35 H64 O3 N1	3.36165e-05	7.51018e-06	2.37215e-05	1.42524e-05	9.96215e-06	6.2605e-05	2.51482e-05	3.39087e-06	1.79352e-05	8.83755e-06	2.0698e-05	2.34193e-05	5.32343e-05	0.00010483	1.57036e-05	8.07232e-05	6.28819e-05	1.73286e-05	2.37646e-05	3.13286e-05	1.12294e-05	4.24444e-05	7.17478e-05	7.48014e-05	7.32059e-05	7.32517e-05
29	Cer(d14:0/21:4)	Cer(d14:0_21:4)+H	Cer(d35:4)+H	Cer	(d14:0_21:4)	(d14:0)	(21:4)		546.488	10.009	546.488	C35 H64 O3 N1	0.000875997	2.12607e-05	0.00100973	5.57887e-06	7.17079e-06	9.58091e-05	6.35157e-05	2.51613e-05	4.5177e-05	4.10509e-05	0.000219046	6.77707e-05	4.25788e-05	2.8032e-05	2.74046e-05	0.000578386	6.29908e-05	1.23703e-05	4.28471e-05	7.05264e-05	1.67558e-05	9.49663e-05	0.000639098	6.4935e-06	0.000347185	0.000330925
30	Cer(d15:0/20:4)	Cer(d15:0_20:4)+H	Cer(d35:4)+H	Cer	(d15:0_20:4)	(d15:0)	(20:4)		546.488	10.957	546.488	C35 H64 O3 N1	0.00265248	1.45231e-05	4.63508e-05	3.68121e-06	2.59397e-05	2.16928e-05	2.20676e-05	7.45591e-06	7.23059e-05	3.12126e-06	0.000286962	2.91629e-05	2.05957e-05	2.29674e-05	1.53795e-05	3.58598e-05	3.4955e-05	1.40693e-05	1.48352e-05	3.50906e-05	1.0875e-05	2.3379e-05	1.45188e-05	2.00352e-05	1.71159e-05	1.72233e-05
31	Cer(d20:0/16:0)	Cer(d20:0_16:0)+H	Cer(d36:0)+H	Cer	(d20:0_16:0)	(d20:0)	(16:0)		568.566	11.202	568.566	C36 H74 O3 N1	2.82599e-05	8.45815e-05	0.000589876	5.71126e-05	9.00456e-05	0.000205266	4.63377e-05	0.000154323	0.000105556	0.0103552	0.00117165	0.0131237	0.00535928	0.0076383	0.000139912	0.00995215	0.00054103	0.00606913	0.00712323	0.012055	0.023858	0.00858597	3.47182e-05	0.00666651	0.00309525	0.00326549
32	Cer(d18:0/18:0)	Cer(d18:0_18:0)+H	Cer(d36:0)+H	Cer	(d18:0_18:0)	(d18:0)	(18:0)		568.566	11.326	568.566	C36 H74 O3 N1	0.0076189	0.0161027	0.0230844	0.00904366	0.0139245	0.0127168	0.00511502	0.0074622	0.0179985	0.000764985	0.0113832	0.00121283	0.000191336	0.0076383	0.000395731	0.000147469	0.000127232	0.000496995	0.000550486	0.000157158	0.00174337	0.00126609	0.0106167	0.00666651	0.00879337	0.00869221
33	Cer(d16:0/20:0+O)	Cer(d16:0_20:0+O)+H	Cer(d36:0+O)+H	Cer	(d16:0_20:0+O)	(d16:0)	(20:0+O)		584.56	11.757	584.561	C36 H74 O4 N1	0.000686855	0.000996606	0.000891565	0.000542809	0.000562274	0.000619953	0.00043505	0.000492214	0.000879947	0.000919958	0.000702723	0.000682675	0.000479585	0.000836659	0.000569518	0.000740611	0.000687585	0.000621116	0.0006491	0.000898765	0.000916661	0.000708227	0.00111211	0.00100835	0.00106423	0.00106156
34	Cer(d22:1/16:0)	Cer(d22:1_16:0)+H	Cer(d38:1)+H	Cer	(d22:1_16:0)	(d22:1)	(16:0)		594.582	11.323	594.582	C38 H76 O3 N1	0.000364489	0.000721297	0.00100959	8.94461e-05	0.000423827	0.000473305	5.81046e-05	0.000175547	0.00015422	5.15609e-05	0.000352139	5.79606e-05	5.22252e-05	1.20805e-05	1.69137e-05	3.62826e-05	0.000983752	1.22354e-05	0.000925209	0.00131506	0.00373014	0.000714186	0.000687498	3.32688e-05	0.000385603	0.00036879
35	Cer(d22:1/16:0)	Cer(d22:1_16:0)+H	Cer(d38:1)+H	Cer	(d22:1_16:0)	(d22:1)	(16:0)		594.582	11.538	594.582	C38 H76 O3 N1	0.00059295	0.00100196	0.00165921	0.00099826	0.000367543	0.000521597	0.000548267	0.00114483	0.00222707	2.00032e-05	0.00090817	0.00165572	6.35113e-06	0.000996683	5.14936e-05	1.54868e-05	3.48946e-05	4.61475e-05	4.09577e-05	6.02338e-05	0.000238364	0.000314633	0.00122663	0.000619494	0.000946445	0.000930856
36	Cer(d22:0/18:0)	Cer(d22:0_18:0)+H	Cer(d40:0)+H	Cer	(d22:0_18:0)	(d22:0)	(18:0)		624.629	12.508	624.629	C40 H82 O3 N1	1.87252e-05	2.35329e-05	0.00285238	2.73557e-05	8.55578e-05	5.45011e-05	6.41305e-05	4.80252e-05	7.7632e-05	3.74021e-05	0.000328925	6.83641e-05	4.40824e-05	6.29648e-05	0.00386113	5.7587e-05	0.00257687	0.00247464	0.000109849	5.63831e-05	0.00719118	0.00165031	9.99055e-05	2.14578e-05	6.37507e-05	6.17047e-05
37	Cer(d22:0/18:0)	Cer(d22:0_18:0)+H	Cer(d40:0)+H	Cer	(d22:0_18:0)	(d22:0)	(18:0)		624.629	12.727	624.629	C40 H82 O3 N1	5.10683e-05	5.62129e-05	0.000123453	6.27502e-05	0.000114565	8.47396e-05	0.000109496	0.000156775	1.77295e-05	3.53993e-05	8.12189e-05	6.73889e-05	4.54358e-05	0.000320185	0.00012911	0.000201158	2.94384e-05	6.82803e-05	3.92777e-05	1.84363e-05	0.000239259	0.000115797	5.88609e-05	0.00536333	0.00250685	0.00264301
38	Cer(d22:0/18:0)	Cer(d22:0_18:0)+H	Cer(d40:0)+H	Cer	(d22:0_18:0)	(d22:0)	(18:0)		624.629	12.857	624.629	C40 H82 O3 N1	1.87642e-05	0.00348431	0.00457702	0.00394631	0.000101793	0.00540278	1.49497e-05	0.00436349	0.00573491	0.000125422	0.00277698	0.000117911	1.73411e-05	1.17409e-05	2.82939e-05	7.12992e-05	2.11509e-05	2.60117e-05	4.40444e-05	8.77199e-05	9.53642e-05	5.20877e-05	0.00367733	0.000110523	0.0020312	0.00193968
39	Cer(m34:2)	Cer(m34:2)+NH4	Cer(m34:2)+NH4	Cer	(m34:2)	(m34:2)			537.535	11.959	537.535	C34 H69 O2 N2	0.00391266	0.00644281	0.00416488	0.0048824	0.00673557	0.00139296	0.0021727	0.00281915	0.00438253	0.0076705	0.00445762	0.00379797	0.00465937	0.00528405	0.00433216	0.00410743	0.00388321	0.00393045	0.00402233	0.00513336	0.00517599	0.00443263	0.00448534	0.00421857	0.00436209	0.00435533
40	Cer(m20:1/16:1)	Cer(m20:1_16:1)+NH4	Cer(m36:2)+NH4	Cer	(m20:1_16:1)	(m20:1)	(16:1)		565.567	12.944	565.567	C36 H73 O2 N2	0.00478902	0.00757605	0.0045284	0.00604162	0.00828302	0.000269704	0.00228891	0.00424043	0.00410374	0.00844857	0.00505695	0.00311153	0.00587738	0.00654495	0.00509871	0.00382698	0.00460275	0.00497509	0.00426872	0.00599064	0.00632957	0.00506263	0.00493554	0.00509363	0.00500834	0.0050125
41	Cer(m20:0/18:1)	Cer(m20:0_18:1)+Na	Cer(m38:1)+Na	Cer	(m20:0_18:1)	(m20:0)	(18:1)		600.569	8.935	600.569	C38 H75 O2 N1 Na1	7.6694e-05	7.12575e-05	0.000104463	5.03586e-05	6.63608e-05	0.000147119	5.7005e-05	6.86846e-05	0.000158664	0.000198232	9.98838e-05	0.000109684	0.00010691	0.000166401	0.000107244	4.97224e-05	0.00010019	0.000101146	0.000105088	8.60208e-05	5.87405e-05	9.91147e-05	0.000505908	0.000483913	0.000495788	0.000495203
42	Cer(m20:0/20:1)	Cer(m20:0_20:1)+Na	Cer(m40:1)+Na	Cer	(m20:0_20:1)	(m20:0)	(20:1)		628.6	9.991	628.6	C40 H79 O2 N1 Na1	0.000153212	0.000155521	0.000234438	0.000131793	0.00012893	0.000282159	0.000121702	0.000144024	0.000358184	0.000392651	0.000210262	0.000246143	0.000208024	0.00034608	0.000228746	0.000130314	0.000198203	0.000192995	0.000218358	0.000177307	0.000149101	0.000209527	0.000799278	0.000761606	0.000781911	0.000780932
43	Cer(t17:0/17:0)	Cer(t17:0_17:0)+H	Cer(t34:0)+H	Cer	(t17:0_17:0)	(t17:0)	(17:0)		556.53	10.852	556.53	C34 H70 O4 N1	0.00103126	0.00142634	0.00175089	0.00158427	0.000725876	0.00253907	0.000969318	0.00125515	0.00145022	0.00226917	0.00150016	0.00108552	0.0013189	0.00198664	0.00296439	0.00098638	0.000945534	0.00116654	0.00126046	0.00100979	0.00204779	0.00147719	0.00161346	0.00168159	0.00164488	0.00164664
44	Cer(t18:0/16:0)	Cer(t18:0_16:0)+H	Cer(t34:0)+H	Cer	(t18:0_16:0)	(t18:0)	(16:0)		556.53	12.047	556.53	C34 H70 O4 N1	0.00360896	0.00467085	0.00589344	0.00262275	0.00292539	0.00253593	0.0017946	0.00259709	0.00489906	0.00397085	0.00355189	0.00400179	0.00231961	0.00468449	0.00278861	0.00357209	0.0027358	0.00236236	0.00318076	0.00432198	0.00572088	0.00356884	0.00843462	0.00872953	0.00857041	0.00857819
45	Cer(t18:0/18:0)	Cer(t18:0_18:0)+H	Cer(t36:0)+H	Cer	(t18:0_18:0)	(t18:0)	(18:0)		584.561	13.11	584.561	C36 H74 O4 N1	0.00216801	0.00365223	0.00347947	0.00184735	0.00192209	0.00168537	0.00120607	0.00162408	0.00289656	0.0029816	0.00234628	0.00227223	0.00163479	0.00265649	0.00128675	0.00200692	0.00133166	0.00161103	0.00159738	0.00305493	0.00403193	0.00214841	0.00517498	0.00109393	0.00329147	0.00318679
46	ChE(18:2)	ChE(18:2)+NH4	ChE(18:2)+NH4	ChE	(18:2)	(18:2)			666.618	12.195	666.618	C45 H80 O2 N1	8.29886e-06	8.75646e-06	2.49444e-05	9.0756e-06	6.7041e-06	1.5821e-06	5.13865e-06	1.00985e-05	6.89484e-06	2.22756e-06	8.37211e-06	2.19518e-05	1.13999e-06	8.4069e-06	8.82023e-06	3.19874e-06	1.94335e-12	5.52619e-06	1.75533e-12	1.36948e-05	8.90492e-06	7.16436e-06	0.00042822	4.85633e-06	0.000232877	0.000221985
47	DG(16:0e)	DG(16:0e)+NH4	DG(16:0e)+NH4	DG	(16:0e)	(16:0e)			348.311	5.709	348.311	C19 H42 O4 N1	0.00246799	0.00472516	0.0023771	0.00325111	0.00393011	0.00331543	0.002255	0.00162838	0.0019122	0.00448863	0.00303511	0.00181344	0.00247226	0.00396937	0.00136489	0.0018296	0.0016214	0.00325894	0.00199705	0.00513252	0.00420782	0.00276673	0.00246649	0.00281837	0.00262882	0.00263789
48	DG(18:0)	DG(18:0)+NH4	DG(18:0)+NH4	DG	(18:0)	(18:0)			390.321	4.374	390.321	C21 H44 O5 N1	3.54493e-05	9.91634e-05	3.18439e-05	7.90404e-05	4.79626e-05	4.95679e-05	2.13086e-05	4.15729e-05	4.61699e-05	7.1817e-05	5.23896e-05	3.28827e-05	3.44757e-05	4.98539e-05	9.68924e-06	2.55612e-05	1.00063e-05	4.99725e-05	1.68391e-05	6.44288e-05	7.67309e-05	3.7044e-05	0.000484693	0.000533827	0.000507399	0.00050864
49	DG(18:0e)	DG(18:0e)+Na	DG(18:0e)+Na	DG	(18:0e)	(18:0e)			381.298	7.317	381.298	C21 H42 O4 Na1	0.0575691	0.117574	0.0568537	0.112081	0.127797	0.112969	0.0771027	0.0760524	0.0588612	0.143937	0.0940797	0.0497234	0.0934481	0.119904	0.0151451	0.0638791	0.0611077	0.0988904	0.067313	0.128227	0.107115	0.0804752	0.0740036	0.0922261	0.08241	0.0828799
50	DG(19:2e)	DG(19:2e)+Na	DG(19:2e)+Na	DG	(19:2e)	(19:2e)			391.282	7.341	391.282	C22 H40 O4 Na1	0.000835557	0.000183102	0.000673224	0.00101992	0.00244946	0.00280397	0.000286164	0.000184336	0.00346664	0.00202204	0.00139244	0.0015891	0.000910469	0.00115349	4.89176e-05	1.81588e-05	7.56394e-05	0.000716873	5.626e-05	0.000274488	0.00180969	0.000665309	0.00146695	0.00248249	0.0019356	0.00196168
51	DG(19:2e)	DG(19:2e)+Na	DG(19:2e)+Na	DG	(19:2e)	(19:2e)			391.282	7.761	391.282	C22 H40 O4 Na1	0.000180343	0.00116944	0.000959541	0.000157678	0.00101324	0.00191951	0.000996326	0.0178813	0.0111022	0.0127126	0.00480921	0.0158304	0.00547047	0.00176105	0.0222414	0.00496833	0.0046803	0.000775333	0.0215623	0.00184408	0.000828697	0.00799623	0.00357121	0.0104997	0.00676853	0.0069465
52	DG(19:2e)	DG(19:2e)+Na	DG(19:2e)+Na	DG	(19:2e)	(19:2e)			391.282	7.838	391.282	C22 H40 O4 Na1	0.00625371	0.000175737	4.72525e-05	6.09604e-05	0.000158815	7.98955e-05	0.000396018	0.00019959	0.000146961	0.000101045	0.000761998	0.000182182	0.00020735	0.00030871	0.0001154	8.30842e-05	0.000171377	6.91796e-05	9.02363e-05	0.000519365	0.000295879	0.000204276	9.62593e-05	0.000249551	0.000167049	0.000170953
53	DG(19:2e)	DG(19:2e)+Na	DG(19:2e)+Na	DG	(19:2e)	(19:2e)			391.282	7.84	391.282	C22 H40 O4 Na1	0.00625371	0.000175737	4.72525e-05	6.09604e-05	0.000158815	7.98955e-05	0.000287932	0.000149566	0.000146961	0.000101045	0.000746187	0.000182182	0.000146315	2.45264e-05	0.0001154	8.30842e-05	0.000171377	0.000219123	9.02363e-05	0.000519365	0.000295879	0.000184749	9.62593e-05	3.65354e-05	6.87454e-05	6.71801e-05
54	DG(21:2e)	DG(21:2e)+Na	DG(21:2e)+Na	DG	(21:2e)	(21:2e)			419.313	8.905	419.313	C24 H44 O4 Na1	0.0032632	0.0017762	0.00212121	0.00126496	4.68363e-05	0.00183733	0.00132423	2.68926e-05	0.00192733	0.00183727	0.00154255	0.00227282	3.60993e-06	0.00180295	0.00178818	0.00171696	0.00147425	1.25331e-05	0.0013864	0.00140877	9.17247e-06	0.00118756	0.00161351	0.0016409	0.00162613	0.00162685
55	DG(23:1e)	DG(23:1e)+H	DG(23:1e)+H	DG	(23:1e)	(23:1e)			427.378	9.914	427.378	C26 H51 O4	0.012521	0.0218195	0.0212713	0.0174615	0.0270308	0.0232109	0.0167837	0.0124961	0.0159639	0.0311936	0.0199752	0.0243705	0.0186785	0.0319668	0.0173831	0.0206774	0.0155526	0.0161482	0.0126172	0.0235942	0.022607	0.0203595	0.019387	0.0220638	0.0206215	0.0206908
56	DG(23:1e)	DG(23:1e)+NH4	DG(23:1e)+NH4	DG	(23:1e)	(23:1e)			444.404	9.914	444.405	C26 H54 O4 N1	0.00654213	0.0111224	0.0106639	0.00891203	0.0129212	0.0110202	0.0083061	0.00642835	0.00819097	0.014777	0.00988841	0.0113182	0.00904604	0.0152412	0.00852932	0.0104461	0.00806761	0.00824477	0.00648117	0.0116725	0.0116108	0.0100658	0.00904564	0.0103144	0.00963082	0.00966362
57	DG(23:2e)	DG(23:2e)+Na	DG(23:2e)+Na	DG	(23:2e)	(23:2e)			447.344	8.514	447.344	C26 H48 O4 Na1	6.7664e-05	0.000169743	0.0034158	0.000132779	9.1461e-05	0.000610365	4.25409e-05	9.29198e-05	3.34501e-05	3.26526e-05	0.000468938	9.01511e-05	0.000105843	0.000147414	0.000109211	9.93203e-05	0.000149401	7.26763e-05	0.00440678	2.34083e-05	9.09978e-05	0.00052952	0.00412434	0.000132476	0.00228203	0.00217962
58	DG(23:2e)	DG(23:2e)+Na	DG(23:2e)+Na	DG	(23:2e)	(23:2e)			447.344	8.613	447.344	C26 H48 O4 Na1	8.53852e-05	0.000192087	0.0034158	0.000165326	0.000138416	8.45616e-05	7.65131e-05	7.64083e-05	0.000124971	0.000172956	0.000453242	6.75806e-05	6.6231e-05	1.54089e-05	5.39598e-05	8.63327e-05	4.59346e-05	8.58092e-05	0.000117696	7.56768e-05	8.04322e-05	6.95062e-05	0.00412434	7.5483e-05	0.00225573	0.00215185
59	DG(23:2e)	DG(23:2e)+Na	DG(23:2e)+Na	DG	(23:2e)	(23:2e)			447.344	8.858	447.344	C26 H48 O4 Na1	0.000133094	6.60654e-05	3.66529e-05	8.72336e-05	5.33618e-05	0.000388634	7.37137e-05	0.000105176	0.00236828	0.000123239	0.000343545	0.000123837	8.99752e-05	7.99485e-05	6.14314e-05	0.000103683	6.33272e-05	5.22031e-05	8.84765e-05	5.00214e-05	0.000208924	9.21827e-05	2.61649e-05	5.98811e-05	4.17753e-05	4.26071e-05
60	DG(23:2e)	DG(23:2e)+Na	DG(23:2e)+Na	DG	(23:2e)	(23:2e)			447.344	8.996	447.344	C26 H48 O4 Na1	7.49681e-05	3.92291e-05	0.000159216	2.33024e-05	1.47836e-05	1.97613e-05	6.17754e-05	9.86928e-05	0.000305191	9.42213e-05	8.91141e-05	0.000124462	6.64242e-05	9.79411e-05	8.29873e-05	4.81335e-05	3.6419e-05	7.53226e-05	0.000109296	8.90375e-05	3.33319e-05	7.63355e-05	4.16119e-05	0.000116902	7.64074e-05	7.8307e-05
61	DG(23:5e)	DG(23:5e)+NH4	DG(23:5e)+NH4	DG	(23:5e)	(23:5e)			436.342	7.356	436.342	C26 H46 O4 N1	7.34722e-05	0.000415637	7.99804e-05	0.000489503	0.000185358	0.000655136	6.21463e-05	0.00010999	0.000660726	3.53718e-05	0.000276732	0.000742593	0.000371992	0.000788059	0.000511819	0.000153478	2.9597e-05	0.000417508	3.82673e-05	0.000632418	0.000987867	0.00046736	0.00113285	0.000532634	0.000855862	0.000840448
62	DG(25:5e)	DG(25:5e)+H	DG(25:5e)+H	DG	(25:5e)	(25:5e)			447.347	0.986	447.347	C28 H47 O4	6.55661e-05	3.36437e-05	5.94772e-05	1.29039e-05	1.80938e-05	5.22022e-05	5.33242e-05	3.62067e-05	4.14647e-05	9.27629e-05	4.65645e-05	9.28931e-06	1.48115e-05	0.000146275	5.67561e-05	5.27758e-05	5.03142e-05	2.67568e-05	4.29151e-05	6.97999e-06	3.18617e-05	4.38736e-05	5.13775e-06	3.72124e-05	1.99915e-05	2.07805e-05
63	DG(27:1e)	DG(27:1e)+H	DG(27:1e)+H	DG	(27:1e)	(27:1e)			483.441	11.896	483.441	C30 H59 O4	0.000154204	0.000139494	0.000102651	1.75921e-05	0.000130384	0.000272005	6.5515e-05	0.00323944	0.000233555	0.000160103	0.000451494	4.20934e-05	5.48398e-05	0.000134261	0.0002621	4.22727e-05	0.00024937	2.44256e-05	7.44837e-05	9.05465e-05	5.49021e-05	0.000102929	0.000174645	0.000105727	0.000142885	0.000141086
64	DG(27:1e)	DG(27:1e)+NH4	DG(27:1e)+NH4	DG	(27:1e)	(27:1e)			500.467	11.896	500.467	C30 H62 O4 N1	8.31393e-05	1.93472e-05	2.2889e-05	2.00947e-05	5.25164e-05	8.77627e-05	4.5238e-05	0.000192786	0.00010993	7.74953e-05	7.11199e-05	1.09743e-05	8.06396e-06	6.09919e-05	9.43512e-05	3.56675e-05	0.000480716	1.71803e-05	1.92271e-05	0.000417622	6.96136e-05	0.000121441	6.19756e-05	2.72771e-05	4.60121e-05	4.50882e-05
65	DG(27:1e)	DG(27:1e)+NH4	DG(27:1e)+NH4	DG	(27:1e)	(27:1e)			500.467	12.047	500.467	C30 H62 O4 N1	6.29965e-05	0.000108314	2.13183e-05	4.42526e-05	4.00758e-05	2.11533e-05	3.29677e-05	9.08056e-05	5.00967e-05	3.08502e-05	5.02831e-05	2.57149e-05	2.77268e-06	2.04016e-05	9.90391e-06	7.90458e-05	2.36226e-05	4.47315e-06	0.000169058	9.95797e-05	6.70944e-05	5.01667e-05	4.37246e-05	9.14529e-05	6.58007e-05	6.69927e-05
66	DG(28:1e)	DG(28:1e)+H	DG(28:1e)+H	DG	(28:1e)	(28:1e)			497.456	7.412	497.456	C31 H61 O4	0.00046156	0.000270622	0.000191482	0.000531799	0.000261493	0.000129188	0.00041832	0.000502211	0.000615969	0.000422406	0.000380505	0.000168484	0.000103433	0.000672867	0.000407867	0.000600434	0.000209546	0.000263173	0.000399895	0.000264392	0.000385125	0.000347522	0.000103407	0.000917432	0.000479116	0.000499985
67	DG(28:1e)	DG(28:1e)+H	DG(28:1e)+H	DG	(28:1e)	(28:1e)			497.456	7.565	497.456	C31 H61 O4	0.000309941	0.0001744	0.00052098	5.16972e-05	0.000625695	0.000255178	6.26256e-05	0.000138638	0.000646701	0.000961204	0.000374706	0.000454407	0.000116748	4.51578e-05	0.000457501	0.000160847	0.000427624	0.000257284	9.59102e-05	0.00034635	0.000497198	0.000285903	0.000493709	0.000389571	0.000445681	0.000442987
68	DG(28:1e)	DG(28:1e)+NH4	DG(28:1e)+NH4	DG	(28:1e)	(28:1e)			514.483	7.568	514.483	C31 H64 O4 N1	7.87815e-05	0.000245089	0.000148729	0.000145835	0.000141121	0.000354198	3.27358e-05	7.11453e-05	0.000280581	0.000748871	0.000224709	3.42247e-05	7.52204e-05	0.000427341	0.000299916	0.000330921	0.000169968	0.000131911	0.000114719	0.000281574	0.000179831	0.000204563	0.000994768	0.000324555	0.000685484	0.000668269
69	DG(28:1e)	DG(28:1e)+H	DG(28:1e)+H	DG	(28:1e)	(28:1e)			497.456	7.787	497.456	C31 H61 O4	0.000215945	0.000164533	0.000193346	4.88914e-05	0.000386657	0.000536574	0.000197321	0.000533106	0.000395178	0.000447515	0.000311907	0.000444969	0.000343478	8.90077e-05	0.000135766	0.000193897	0.000327023	0.0002744	0.000471179	5.53597e-05	0.000511178	0.000284626	0.000319824	0.000434145	0.00037262	0.00037553
70	DG(8:0e/20:1)	DG(8:0e_20:1)+NH4	DG(28:1e)+NH4	DG	(8:0e_20:1)	(8:0e)	(20:1)		514.483	13.064	514.483	C31 H64 O4 N1	0.000451266	0.0013948	0.000103378	0.0133632	0.000800977	0.000182515	0.000182571	8.14221e-05	0.000389019	0.0247424	0.00416915	0.000271662	9.73917e-05	0.00104342	0.0153984	0.000188417	0.000200084	6.25752e-05	0.00712317	0.000297453	0.000142008	0.00248245	0.000149537	0.00052724	0.000323888	0.000333555
71	DG(16:1e/12:0)	DG(16:1e_12:0)+NH4	DG(28:1e)+NH4	DG	(16:1e_12:0)	(16:1e)	(12:0)		514.483	13.247	514.483	C31 H64 O4 N1	0.000616295	0.000223266	0.000241641	2.80776e-05	0.00036021	0.000383253	0.000435659	0.000245443	0.0078084	0.000120675	0.00104629	0.000164926	6.3329e-05	0.000116466	0.000185887	0.000432222	0.000227957	0.00018149	0.000237331	0.000264094	0.000304104	0.000217781	0.000456721	0.000197434	0.000337096	0.000330417
72	DG(16:1e/12:0)	DG(28:1e)+H	DG(28:1e)+H	DG	(16:1e_12:0)	(16:1e)	(12:0)		497.456	13.24	497.456	C31 H61 O4	0.00102231	0.000232008	0.000989176	0.00035754	0.000480611	0.000627057	0.000222645	0.000352722	0.000432816	0.000208016	0.000492491	0.000703842	8.35959e-05	0.000279876	0.000450316	0.00103569	0.000405506	0.000578976	0.000391545	0.000252662	0.00077781	0.000495982	0.000829415	0.00104349	0.000928225	0.000933711
73	DG(28:2e)	DG(28:2e)+H	DG(28:2e)+H	DG	(28:2e)	(28:2e)			495.441	2.227	495.441	C31 H59 O4	2.72628e-06	2.19181e-05	1.94075e-05	1.15511e-05	1.07715e-05	4.46654e-05	6.33374e-06	1.80277e-05	1.1306e-05	6.39545e-06	1.53103e-05	1.73683e-05	2.02795e-05	1.3241e-05	1.52868e-05	2.92699e-05	8.13195e-06	2.33658e-05	7.08207e-06	1.32575e-05	2.67249e-05	1.74008e-05	4.58642e-06	1.31254e-05	8.57883e-06	8.76357e-06
74	DG(29:1e)	DG(29:1e)+NH4	DG(29:1e)+NH4	DG	(29:1e)	(29:1e)			528.499	8.539	528.499	C32 H66 O4 N1	0.027973	0.00100009	0.0169764	0.0104977	0.000488449	0.00027617	0.000217543	0.000607913	9.5206e-05	0.000392429	0.0058525	0.000615677	0.000381928	0.000127184	0.000233749	0.00126766	0.000467245	0.000349311	9.18385e-05	0.000275282	0.000166777	0.000397665	0.000530314	0.000378686	0.000460369	0.000456456
75	DG(29:2e)	DG(29:2e)+Na	DG(29:2e)+Na	DG	(29:2e)	(29:2e)			531.438	3.141	531.438	C32 H60 O4 Na1	2.50169e-07	1.20663e-05	1.34943e-05	1.13554e-05	5.0143e-06	7.04109e-06	4.98915e-06	3.73412e-06	4.8024e-06	6.84459e-06	6.95917e-06	2.00077e-05	4.74523e-06	1.9459e-05	1.73419e-05	1.13343e-05	1.77349e-06	8.60618e-06	1.0341e-05	4.17489e-06	8.36615e-06	1.0615e-05	9.82627e-06	3.5366e-06	6.97522e-06	6.77936e-06
76	DG(16:0/14:0)	DG(16:0_14:0)+NH4	DG(30:0)+NH4	DG	(16:0_14:0)	(16:0)	(14:0)		558.509	12.247	558.509	C33 H68 O5 N1	0.000433675	0.000446877	0.0006531	0.00031233	0.000418728	0.000373813	0.000283925	0.000267519	0.000563905	0.000477536	0.000423141	0.000512007	0.000266349	0.000661081	0.000415799	0.000494506	0.00038548	0.000304682	0.000362723	0.000430467	0.000419605	0.00042527	0.000136914	0.000490671	0.000300214	0.000309267
77	DG(8:1e/22:0)	DG(8:1e_22:0)+NH4	DG(30:1e)+NH4	DG	(8:1e_22:0)	(8:1e)	(22:0)		542.514	1.383	542.514	C33 H68 O4 N1	3.63539e-05	3.18578e-05	6.14541e-05	6.43731e-05	2.84741e-05	9.32757e-05	4.76432e-05	8.43979e-05	2.93313e-05	0.000210332	6.87493e-05	3.69109e-05	2.46264e-05	3.04113e-05	0.000235067	8.3029e-05	4.40244e-05	0.000280627	0.000182187	0.000185518	0.000138866	0.000124127	8.58031e-05	5.92468e-05	7.3596e-05	7.2882e-05
78	DG(16:0e/14:1)	DG(16:0e_14:1)+NH4	DG(30:1e)+NH4	DG	(16:0e_14:1)	(16:0e)	(14:1)		542.514	2.965	542.514	C33 H68 O4 N1	3.17134e-05	3.29916e-05	7.92621e-05	5.18212e-05	1.38986e-05	0.00050761	5.57383e-05	1.43719e-05	8.58572e-05	0.000128717	0.000100198	0.000143571	3.81056e-05	8.49557e-05	9.11473e-05	1.50718e-05	4.97043e-05	6.11863e-05	3.84279e-05	3.09539e-05	4.77207e-05	6.00845e-05	8.10695e-05	4.82003e-05	6.59493e-05	6.5073e-05
79	DG(16:0e/14:1)	DG(16:0e_14:1)+NH4	DG(30:1e)+NH4	DG	(16:0e_14:1)	(16:0e)	(14:1)		542.514	3.56	542.514	C33 H68 O4 N1	6.87471e-06	4.00581e-05	7.30093e-06	1.15303e-05	1.54e-05	2.67245e-05	2.12773e-05	5.39429e-06	2.5879e-05	2.68972e-05	1.87336e-05	7.13325e-06	1.68201e-05	6.28868e-06	3.42237e-05	1.86117e-05	2.48719e-05	2.48033e-05	5.17053e-05	4.04838e-05	4.69697e-05	2.71911e-05	7.7483e-05	9.24389e-05	8.44336e-05	8.47852e-05
80	DG(30:1e)	DG(30:1e)+NH4	DG(30:1e)+NH4	DG	(30:1e)	(30:1e)			542.514	10.201	542.514	C33 H68 O4 N1	6.04259e-05	6.29236e-05	4.22322e-05	2.30222e-05	9.38119e-05	2.57969e-05	1.02737e-05	5.28507e-05	8.9782e-05	4.07533e-05	5.01872e-05	0.000174493	3.21599e-05	0.000173444	3.86808e-05	5.02427e-05	0.000108639	2.65799e-05	3.96057e-05	6.32822e-05	4.93606e-05	7.56488e-05	9.9692e-05	0.000103081	0.000101304	0.000101359
81	DG(30:1e)	DG(30:1e)+NH4	DG(30:1e)+NH4	DG	(30:1e)	(30:1e)			542.514	10.442	542.514	C33 H68 O4 N1	3.08731e-05	7.25574e-05	0.0001061	3.85781e-05	3.94638e-05	5.24035e-05	6.12477e-05	4.75767e-05	0.000267432	9.60365e-05	8.12268e-05	6.30024e-05	4.68291e-05	3.79243e-05	0.000190196	0.000127535	5.21357e-05	3.85137e-05	0.000104969	0.000164715	8.46843e-05	9.10505e-05	1.08999e-05	6.36947e-05	3.53154e-05	3.66367e-05
82	DG(30:1e)	DG(30:1e)+NH4	DG(30:1e)+NH4	DG	(30:1e)	(30:1e)			542.514	10.64	542.514	C33 H68 O4 N1	0.000119679	7.68328e-05	4.41042e-05	6.46526e-05	0.000183032	4.68402e-05	8.36218e-05	6.14044e-05	2.94888e-05	0.000154122	8.63778e-05	0.000126772	4.05141e-05	2.49699e-05	0.000115445	3.3773e-05	6.01861e-05	2.64662e-05	6.47441e-05	1.95686e-05	8.01074e-05	5.92547e-05	0.000117888	3.14744e-05	7.80563e-05	7.58062e-05
83	DG(10:0e/20:1)	DG(10:0e_20:1)+NH4	DG(30:1e)+NH4	DG	(10:0e_20:1)	(10:0e)	(20:1)		542.514	10.914	542.514	C33 H68 O4 N1	3.81868e-05	5.17932e-05	0.000104961	8.32149e-05	6.48982e-05	0.000272614	2.03471e-05	5.90948e-05	0.000164478	0.000131808	9.91396e-05	6.13715e-05	2.39542e-05	6.22178e-05	2.28021e-05	0.000142806	4.50977e-05	0.000142102	5.47205e-05	0.000144175	0.00022224	9.21487e-05	1.77064e-05	8.2232e-05	4.75353e-05	4.91579e-05
84	DG(18:1e/12:0)	DG(18:1e_12:0)+NH4	DG(30:1e)+NH4	DG	(18:1e_12:0)	(18:1e)	(12:0)		542.514	11.516	542.514	C33 H68 O4 N1	1.47208e-05	6.18789e-05	5.80712e-05	9.32847e-05	0.000117629	2.42685e-05	6.85282e-05	5.73517e-05	3.06121e-05	5.23958e-05	5.78741e-05	0.000103464	4.69261e-05	5.5263e-05	3.93545e-05	5.21534e-05	0.000139511	6.35275e-05	4.37048e-05	8.56258e-05	0.000113465	7.42995e-05	0.000112735	6.52209e-05	9.08553e-05	8.96039e-05
85	DG(31:1e)	DG(31:1e)+NH4	DG(31:1e)+NH4	DG	(31:1e)	(31:1e)			556.53	12.029	556.53	C34 H70 O4 N1	0.00377166	0.00152316	0.00257766	0.00257956	0.00276722	0.00101782	0.00180237	0.000854624	0.00489906	0.00397058	0.00257637	0.00400179	0.0023166	0.00468449	0.0027891	0.0035714	0.00273645	0.00226352	0.00318111	0.00432198	0.00569113	0.00355576	0.00372233	0.00855677	0.00595325	0.00607745
86	DG(31:5e)	DG(31:5e)+H	DG(31:5e)+H	DG	(31:5e)	(31:5e)			531.441	0.388	531.441	C34 H59 O4	9.58922e-05	1.32013e-05	1.96629e-05	1.5517e-05	1.39775e-05	1.90666e-05	4.06607e-05	1.58691e-05	6.01667e-06	1.3284e-05	2.53148e-05	3.92427e-05	4.5171e-06	2.08463e-05	1.15927e-05	2.09635e-05	7.49277e-06	1.37318e-05	2.42194e-05	1.11963e-05	8.24354e-06	1.62046e-05	4.3831e-05	8.68732e-06	2.76628e-05	2.6727e-05
87	DG(16:0/16:0)	DG(16:0_16:0)+NH4	DG(32:0)+NH4	DG	(16:0_16:0)	(16:0)	(16:0)		586.539	13.28	586.541	C35 H72 O5 N1	0.00211549	0.0155619	0.0177695	0.0116904	0.0136147	0.0092785	0.00891892	0.00786147	0.0130719	0.0194254	0.0119308	0.0161393	0.0109923	0.027824	0.0106367	0.0159741	0.010852	0.00977678	0.0135505	0.0158326	0.0214746	0.0153053	0.0149031	0.0212161	0.0178159	0.0179784
88	DG(16:0/16:0)	DG(16:0_16:0)+H	DG(32:0)+H	DG	(16:0_16:0)	(16:0)	(16:0)		569.514	13.279	569.514	C35 H69 O5	0.000507642	0.000541158	0.000663312	0.000340164	0.000406524	0.000320649	0.00025195	0.000257107	0.000561018	0.000555987	0.000440551	0.000586165	0.000356812	0.000828936	0.000356669	0.000565482	0.000377103	0.000341638	0.000431287	0.000550751	0.000596485	0.000499133	0.000546999	0.000584589	0.000564375	0.000565321
89	DG(18:0/14:1)	DG(18:0_14:1)+NH4	DG(32:1)+NH4	DG	(18:0_14:1)	(18:0)	(14:1)		584.525	9.755	584.525	C35 H70 O5 N1	2.08649e-05	0.000596024	7.25068e-05	1.42044e-05	1.28098e-05	2.71044e-05	3.54968e-06	0.000708545	1.6759e-05	1.07391e-05	0.000148311	1.46021e-05	2.31959e-06	7.07954e-06	6.30661e-06	4.75836e-06	2.25069e-05	1.68819e-05	8.22432e-07	8.73519e-06	1.58953e-05	9.99079e-06	4.1394e-05	6.6453e-06	2.54082e-05	2.44825e-05
90	DG(16:0/16:1)	DG(16:0_16:1)+NH4	DG(32:1)+NH4	DG	(16:0_16:1)	(16:0)	(16:1)		584.525	12.451	584.525	C35 H70 O5 N1	3.54104e-05	6.49334e-05	0.000567174	0.000425015	0.000513573	0.000473289	0.000387039	3.25801e-05	0.000643908	0.000661667	0.000380459	0.000516294	0.000320956	0.000704923	3.08541e-05	0.000482565	0.000434584	0.000323261	0.000365743	0.000525824	0.00051742	0.000422242	0.000535518	0.000544678	0.000539775	0.00053999
91	DG(32:2e)	DG(32:2e)+H	DG(32:2e)+H	DG	(32:2e)	(32:2e)			551.503	13.3	551.503	C35 H67 O4	0.012371	0.011701	0.0146208	0.00798909	0.00886953	0.00722839	0.00575042	0.00556472	0.0133715	0.0123382	0.00998047	0.0138179	0.0106288	0.0182929	0.009139	0.0134388	0.0088786	0.00971897	0.00980841	0.0120326	0.0125117	0.0118268	0.0125266	0.0136465	0.0130429	0.013072
92	DG(18:0/16:0)	DG(18:0_16:0)+NH4	DG(34:0)+NH4	DG	(18:0_16:0)	(18:0)	(16:0)		614.572	10.835	614.572	C37 H76 O5 N1	0.000372467	0.00194736	0.00547315	0.000132284	0.00379115	0.00258567	0.00223669	0.00285781	0.000237587	0.00118351	0.00208177	0.0416634	0.000457261	0.0282101	0.0273299	0.00105169	0.024093	0.0222288	0.0317018	0.000812084	0.0532181	0.0230766	0.00260873	0.000898839	0.00181958	0.00177571
93	DG(18:0/16:0)	DG(18:0_16:0)+H	DG(34:0)+H	DG	(18:0_16:0)	(18:0)	(16:0)		597.545	10.831	597.545	C37 H73 O5	2.96462e-05	0.000380971	0.000222191	0.000103059	0.00012104	0.000535702	6.76265e-05	4.14088e-05	1.96634e-05	1.61889e-05	0.00015375	3.82187e-05	3.27536e-05	0.000804967	5.05163e-05	0.00102996	0.000653385	0.000646609	0.000851544	0.00127509	0.00156189	0.000694492	0.000165717	5.58123e-06	9.18616e-05	8.772e-05
94	DG(18:0/16:0)	DG(18:0_16:0)+NH4	DG(34:0)+NH4	DG	(18:0_16:0)	(18:0)	(16:0)		614.57	11.064	614.572	C37 H76 O5 N1	0.000298769	0.00133323	0.0494905	0.030311	0.0033676	0.00165844	0.0199586	0.0229285	0.000550974	0.00155074	0.0131448	0.00425762	0.0237989	0.00113449	0.00155779	0.000334815	0.00156293	0.000636282	0.00111732	0.00192171	0.00114798	0.00374699	0.00161923	0.0222106	0.0111218	0.0116506
95	DG(18:0/16:0)	DG(18:0_16:0)+H	DG(34:0)+H	DG	(18:0_16:0)	(18:0)	(16:0)		597.545	11.08	597.545	C37 H73 O5	0.000565141	0.000697225	0.00106655	0.000921094	0.00133521	0.00049141	0.000424329	0.000678658	0.00139739	0.00110222	0.000867923	0.00119479	1.48196e-05	6.00744e-05	2.46824e-05	9.35095e-05	5.5826e-05	1.75138e-05	1.52146e-05	1.93988e-05	0.000170632	0.000166646	0.000733025	0.000622101	0.000681856	0.000678994
96	DG(18:0/16:1)	DG(18:0_16:1)+NH4	DG(34:1)+NH4	DG	(18:0_16:1)	(18:0)	(16:1)		612.556	12.049	612.556	C37 H74 O5 N1	6.21153e-06	4.07008e-05	0.000280565	5.51557e-06	1.18313e-06	6.22865e-06	3.67366e-06	6.76407e-06	9.12863e-06	8.0911e-06	3.68062e-05	1.02751e-05	3.41429e-06	9.33761e-06	1.77432e-06	2.42123e-05	0.000363777	4.73345e-05	0.000200406	0.00046578	1.44289e-05	0.000114074	3.24959e-05	1.66746e-06	1.83196e-05	1.74943e-05
97	DG(34:2e)	DG(34:2e)+H	DG(34:2e)+H	DG	(34:2e)	(34:2e)			579.535	10.837	579.535	C37 H71 O4	0.000127177	0.00891707	0.0128686	0.00932547	0.0043844	0.0233506	0.00240042	0.00323297	0.00356763	0.000250058	0.00684244	0.000168396	0.000952636	0.00212372	0.0202236	0.0260835	0.0177032	0.0178936	0.024317	0.000761832	0.00581883	0.0116046	0.0107053	0.00248327	0.00691053	0.00669969
98	DG(18:0/18:0)	DG(18:0_18:0)+NH4	DG(36:0)+NH4	DG	(18:0_18:0)	(18:0)	(18:0)		642.602	12.892	642.603	C39 H80 O5 N1	0.000264049	0.00110428	0.00151747	0.00194455	0.0319566	0.0240465	0.000544545	0.00988911	0.0266351	0.00106553	0.00989678	0.000350922	0.0145631	0.0146777	0.000357891	0.00285084	0.00014805	0.0105279	0.0012614	0.00208222	0.000346443	0.00471665	0.0139243	8.69438e-05	0.007538	0.00718307
99	DG(18:0/18:0)	DG(18:0_18:0)+NH4	DG(36:0)+NH4	DG	(18:0_18:0)	(18:0)	(18:0)		642.603	13.027	642.603	C39 H80 O5 N1	0.0106124	0.0211446	0.000462355	5.77049e-05	0.0320771	0.000154079	0.000268457	0.00012934	0.000911057	0.000242871	0.006606	0.024325	0.000249422	0.00055	0.0135036	0.0192693	0.0102482	0.000593439	0.000149631	0.000378712	0.00106815	0.00703354	7.62138e-05	0.000275893	0.000168412	0.000173506
100	DG(18:0/18:0)	DG(18:0_18:0)+NH4	DG(36:0)+NH4	DG	(18:0_18:0)	(18:0)	(18:0)		642.603	13.144	642.603	C39 H80 O5 N1	0.0106124	0.0037958	0.028965	0.0027579	0.00213306	0.00277572	0.000743797	0.000282797	0.00174476	0.000828847	0.00546401	0.00171159	0.000542152	0.000201952	0.000770616	0.000329343	0.000336935	0.00100117	0.000878799	0.000418902	0.00122623	0.000741769	0.000272353	0.00039513	0.000329053	0.000332179
101	DG(36:0)	DG(36:0)+Na	DG(36:0)+Na	DG	(36:0)	(36:0)			647.558	13.279	647.558	C39 H76 O5 Na1	0.000360195	0.000988881	0.00264286	0.00100692	0.00228172	0.0020954	0.00122248	0.00154353	0.00311439	0.0012381	0.00164945	0.00257475	0.00144822	0.00166407	0.0013961	0.00172447	0.000924149	0.000975189	0.0017673	0.00330874	0.000415493	0.00161985	0.00242792	0.00193768	0.00220163	0.00218908
102	DG(36:2e)	DG(36:2e)+H	DG(36:2e)+H	DG	(36:2e)	(36:2e)			607.566	12.922	607.566	C39 H75 O4	0.000207336	0.000286091	7.08953e-05	0.000332072	3.19938e-05	0.0121581	0.00662426	0.00657586	0.000337029	0.000551173	0.00271748	8.34163e-05	9.82823e-05	6.5577e-05	0.000152601	0.0119597	5.02533e-05	0.000154994	0.0114715	0.0159537	0.000184354	0.00401744	0.0002585	0.000266082	0.00026204	0.000262208
103	DG(36:2e)	DG(36:2e)+H	DG(36:2e)+H	DG	(36:2e)	(36:2e)			607.566	13.114	607.566	C39 H75 O4	0.00537089	0.0127498	0.0183708	0.0105015	0.0157564	0.000664235	0.000386913	0.000195631	0.0164916	0.0119984	0.00924862	0.000490355	0.00014837	0.000831635	0.000774628	0.000968302	0.000751167	0.000739183	0.000114786	0.000197055	0.0002146	0.000523008	0.000420465	0.00651393	0.00323255	0.00338898
104	DG(18:1/18:2)	DG(18:1_18:2)+NH4	DG(36:3)+NH4	DG	(18:1_18:2)	(18:1)	(18:2)		636.556	12.746	636.556	C39 H74 O5 N1	0.000443223	0.000478291	0.000562328	0.000446515	0.000527707	0.00045839	0.000375744	0.000405036	0.000618137	0.000572605	0.000488798	0.000527576	0.000351409	0.00060253	0.000432108	0.000451542	3.36663e-05	0.000346171	0.000390085	1.12679e-05	0.000552962	0.000369932	0.000545998	0.000522531	0.000535197	0.000534576
105	DG(27:0/10:4)	DG(27:0_10:4)+NH4	DG(37:4)+NH4	DG	(27:0_10:4)	(27:0)	(10:4)		648.556	13.011	648.556	C40 H74 O5 N1	0.00722571	0.0140705	0.0210383	0.000218916	0.00168321	0.000118177	0.000215503	0.00751661	7.68038e-05	0.0137071	0.00658707	0.000714381	0.00587591	0.0103498	0.000192042	0.000176004	6.59783e-05	0.00049243	0.000673746	0.000924954	0.00200938	0.00214747	0.000570603	0.000594548	0.000581681	0.000582277
106	DG(41:4)	DG(41:4)+NH4	DG(41:4)+NH4	DG	(41:4)	(41:4)			704.619	12.317	704.619	C44 H82 O5 N1	5.38711e-06	4.16404e-06	2.58401e-06	1.18845e-05	2.03554e-05	6.81596e-06	5.26361e-06	7.5462e-06	2.1491e-05	1.81214e-05	1.03613e-05	6.47815e-06	8.84768e-06	2.85541e-06	6.49221e-06	5.40392e-06	1.66107e-05	9.84156e-06	1.22002e-05	5.26358e-06	2.38817e-06	7.63816e-06	7.06467e-06	1.19162e-05	9.35523e-06	9.44536e-06
107	Hex1Cer(d39:3)	Hex1Cer(d39:3)+H	Hex1Cer(d39:3)+H	Hex1Cer	(d39:3)	(d39:3)			766.619	10.915	766.619	C45 H84 O8 N1	0.000507463	0.000567796	0.000759856	0.000413343	0.000610964	0.000521226	0.000341638	0.000425784	0.000639875	0.000631499	0.000541944	0.000493601	0.000246451	0.000483674	5.64059e-05	3.06615e-05	0.000361244	0.000279882	0.000328591	0.00038243	0.000404322	0.000306726	0.000490148	0.000506764	0.000497847	0.000498253
108	Hex1Cer(d39:5)	Hex1Cer(d39:5)+H	Hex1Cer(d39:5)+H	Hex1Cer	(d39:5)	(d39:5)			762.588	11.243	762.588	C45 H80 O8 N1	0.00261046	0.000848015	0.00146944	0.00108908	0.000375898	0.00417283	0.00366477	6.9506e-05	0.00380785	0.000423799	0.00185316	0.00279943	0.000396169	0.000917387	0.000414895	0.000139112	0.000526538	0.000350543	0.000237624	0.00249253	0.000183527	0.000845776	0.00096857	0.00115057	0.00105257	0.00105724
109	Hex2Cer(d13:0/19:0)	Hex2Cer(d13:0_19:0)+H	Hex2Cer(d32:0)+H	Hex2Cer	(d13:0_19:0)	(d13:0)	(19:0)		836.609	11.432	836.609	C44 H86 O13 N1	0.000586871	0.00018529	0.000501184	0.00021205	5.42863e-05	0.00082133	0.0004171	4.26405e-06	0.000511404	2.22811e-05	0.000331606	0.000425561	7.94432e-05	4.3172e-05	6.90581e-05	7.93609e-05	8.46944e-05	4.82945e-05	4.43563e-05	0.000367197	2.50564e-05	0.000126619	0.000242656	0.000282391	0.000261035	0.000262027
110	Hex2Cer(d13:0/19:1)	Hex2Cer(d13:0_19:1)+H	Hex2Cer(d32:1)+H	Hex2Cer	(d13:0_19:1)	(d13:0)	(19:1)		834.594	11.201	834.594	C44 H84 O13 N1	0.000259404	1.09039e-05	0.000102973	0.000133191	6.65666e-06	9.20067e-05	0.000107608	8.01338e-06	4.35235e-06	1.72936e-05	7.42402e-05	2.62663e-05	4.97332e-06	1.453e-05	1.63517e-05	3.14691e-06	1.52134e-05	2.7107e-05	1.49014e-05	4.5862e-06	2.28443e-05	1.4992e-05	0.000176558	0.000111882	0.000146756	0.000145065
111	LPC(10:0)	LPC(10:0)+H	LPC(10:0)+H	LPC	(10:0)	(10:0)			412.245	1.032	412.246	C18 H39 O7 N1 P1	0.000174097	0.000189958	0.000215803	0.0001686	0.000229819	0.00020213	0.000153019	0.000172941	0.000229346	0.000271123	0.000200684	0.000238069	0.000152528	0.00028989	0.000172556	0.000183272	0.000180011	0.00014298	0.000156364	0.000198654	0.000209471	0.000192379	0.000180707	0.000201217	0.000190216	0.000190713
112	LPC(12:0)	LPC(12:0)+H	LPC(12:0)+H	LPC	(12:0)	(12:0)			440.277	1.389	440.277	C20 H43 O7 N1 P1	0.0479266	0.056777	0.0612525	0.0505599	0.0704949	0.0609327	0.0486254	0.0537365	0.0703335	0.078236	0.0598875	0.0751522	0.0438414	0.0849009	0.0559738	0.0584524	0.0540144	0.0420202	0.0488682	0.0548601	0.0647651	0.0582849	0.0536193	0.0609047	0.0569792	0.0571677
113	LPC(16:0)	LPC(16:0)+H	LPC(16:0)+H	LPC	(16:0)	(16:0)			496.34	3.354	496.34	C24 H51 O7 N1 P1	4.06569e-05	2.91937e-05	4.7179e-05	3.2586e-05	3.8044e-05	4.6878e-05	5.1415e-05	8.74312e-06	5.22819e-05	4.66219e-05	3.93599e-05	8.71855e-05	1.87924e-05	4.51668e-05	2.12255e-05	3.03438e-05	2.59115e-05	2.02052e-05	1.3687e-05	0.000107988	6.14594e-05	4.31965e-05	0.000164924	0.000175528	0.000169863	0.000170105
114	LPC(34:1)	LPC(34:1)+H	LPC(34:1)+H	LPC	(34:1)	(34:1)			746.606	11.718	746.606	C42 H85 O7 N1 P1	0.000761099	0.000320923	0.000284762	0.000405972	0.000167499	0.0010151	0.000600204	9.40963e-06	0.00170918	0.00015312	0.000542727	0.00180911	0.000103404	0.000125119	0.000214914	0.000593152	0.000249301	0.000297761	9.82582e-05	0.00282559	4.51188e-05	0.000636172	0.000288236	0.000381375	0.000331258	0.000333623
115	MG(14:0)	MG(14:0)+Na	MG(14:0)+Na	MG	(14:0)	(14:0)			325.235	4.054	325.235	C17 H34 O4 Na1	0.000542063	0.000935562	0.000576086	0.000823796	0.000975031	0.00079276	0.000491656	0.000435539	0.000577612	0.00118066	0.000733077	0.000466845	0.000643796	0.000845634	0.000322521	0.000500357	0.000396032	0.000867176	0.000476003	0.00118686	0.00113831	0.000684353	0.000646543	0.000796719	0.000715872	0.000719711
116	MG(16:0)	MG(16:0)+NH4	MG(16:0)+NH4	MG	(16:0)	(16:0)			348.311	5.709	348.311	C19 H42 O4 N1	0.00246799	0.00472516	0.0023771	0.00325111	0.00393011	0.00331543	0.002255	0.00162838	0.0019122	0.00448863	0.00303511	0.00181344	0.00247226	0.00396937	0.00136489	0.0018296	0.0016214	0.00325894	0.00199705	0.00513252	0.00420782	0.00276673	0.00246649	0.00281837	0.00262882	0.00263789
117	MG(16:0)	MG(16:0)+H	MG(16:0)+H	MG	(16:0)	(16:0)			331.284	5.707	331.284	C19 H39 O4	0.00432361	0.00770314	0.00398348	0.00579955	0.00662609	0.00532488	0.0036818	0.00290462	0.00297818	0.00740052	0.00507259	0.00316617	0.00417256	0.00686512	0.00258396	0.00329316	0.00286869	0.00555268	0.00345355	0.00794482	0.00736151	0.00472622	0.00404829	0.00504394	0.00450765	0.00453329
118	MG(16:0)	MG(16:0)+H	MG(16:0)+H	MG	(16:0)	(16:0)			331.284	5.871	331.284	C19 H39 O4	6.33069e-06	2.98336e-05	2.29537e-05	1.69667e-05	1.12993e-05	1.22763e-05	2.29789e-05	6.5918e-06	1.73525e-05	2.41734e-05	1.70757e-05	3.38106e-05	2.08754e-05	1.85458e-05	6.38276e-06	1.57242e-05	1.95459e-05	4.14583e-05	2.86839e-05	8.51838e-05	5.0798e-05	3.21009e-05	5.41827e-05	9.17819e-06	3.34634e-05	3.22748e-05
119	MG(16:2e)	MG(16:2e)+H	MG(16:2e)+H	MG	(16:2e)	(16:2e)			313.274	13.288	313.274	C19 H37 O3	0.00212077	0.00219651	0.00305289	0.00180622	0.00236043	0.00147618	0.00150482	0.00143117	0.00273733	0.00229958	0.00209859	0.00227748	0.00146839	0.00303522	0.00191526	0.00220903	0.00153319	0.00142386	0.0016377	0.0022797	0.00290467	0.00206845	0.0021715	0.00235076	0.00225418	0.00225881
120	MG(17:0)	MG(17:0)+Na	MG(17:0)+Na	MG	(17:0)	(17:0)			367.282	6.534	367.282	C20 H40 O4 Na1	0.000263613	0.000494581	0.000284676	0.000460191	0.000525025	0.000450726	0.000290901	0.000276529	0.000223779	0.000684649	0.000395467	0.000225652	0.000395179	0.000473945	0.000206334	0.00024775	0.000218547	0.000555215	0.000297801	0.000656573	0.000576014	0.000385301	0.000355887	0.000332287	0.000345033	0.000344402
121	MG(18:0)	MG(18:0)+Na	MG(18:0)+Na	MG	(18:0)	(18:0)			381.298	7.082	381.298	C21 H42 O4 Na1	0.00132481	0.00281326	0.00135449	0.00349154	0.00334517	0.0028542	0.00280315	0.00177852	0.00148671	0.00501142	0.00262633	0.00154905	0.000108783	0.00187093	0.00170907	0.00117182	0.0017788	0.00114164	0.00229353	0.00234365	0.00494399	0.00189113	0.00209639	0.00114039	0.00165517	0.00163065
122	MG(18:0)	MG(18:0)+NH4	MG(18:0)+NH4	MG	(18:0)	(18:0)			376.342	7.327	376.342	C21 H46 O4 N1	0.00301209	0.00619926	0.0025678	0.00596964	0.00620242	0.00581948	0.00406863	0.0034795	0.00227312	0.00735222	0.00469442	0.00200842	0.00518661	0.00449477	0.00159915	0.00243973	0.00215042	0.00570435	0.00300189	0.00661652	0.00640137	0.00396032	0.00408162	0.00433173	0.00419692	0.00420343
123	MG(18:0)	MG(18:0)+H	MG(18:0)+H	MG	(18:0)	(18:0)			359.315	7.325	359.316	C21 H43 O4	0.0058301	0.01263	0.00517464	0.0121325	0.0133686	0.0119231	0.00866794	0.00686818	0.00438766	0.0149549	0.00959376	0.00440147	0.0096024	0.00900212	0.00318176	0.00489331	0.00421165	0.0114837	0.00616818	0.0133722	0.0134632	0.007978	0.00741007	0.00824212	0.00779379	0.00781532
124	MG(18:0)	MG(18:0)+Na	MG(18:0)+Na	MG	(18:0)	(18:0)			381.298	7.314	381.298	C21 H42 O4 Na1	0.0582483	0.116482	0.0613674	0.112315	0.127821	0.111148	0.0781129	0.0749908	0.0587083	0.147363	0.0946559	0.052818	0.0980989	0.116452	0.0356884	0.0633707	0.0639698	0.119983	0.0675771	0.141552	0.111696	0.0871205	0.0733813	0.101268	0.0862474	0.0869655
125	MG(18:0)	MG(18:0)+Na	MG(18:0)+Na	MG	(18:0)	(18:0)			381.298	7.371	381.298	C21 H42 O4 Na1	0.00585876	0.00867533	0.00956183	0.0167349	0.0144268	0.0143337	0.00991263	0.00625758	0.00661078	0.0058749	0.00982473	0.00278126	0.00847486	0.00604278	0.0054177	0.0076618	0.00457904	0.00796863	0.00817578	0.00735436	0.0143791	0.00728353	0.0115194	0.00459907	0.00832535	0.00814795
126	MG(18:0)	MG(18:0)+Na	MG(18:0)+Na	MG	(18:0)	(18:0)			381.298	7.551	381.298	C21 H42 O4 Na1	1.578e-05	9.52889e-05	9.29468e-05	4.71235e-05	6.97534e-05	6.55409e-05	2.47238e-05	3.65264e-05	5.9448e-05	0.000219424	7.26556e-05	5.84612e-05	7.35988e-05	0.000147448	8.09747e-05	4.73274e-05	7.89035e-05	5.76149e-05	3.25369e-05	7.38757e-05	7.35971e-05	7.24338e-05	9.90757e-05	1.97493e-05	6.25154e-05	6.04468e-05
127	MG(18:2e)	MG(18:2e)+H	MG(18:2e)+H	MG	(18:2e)	(18:2e)			341.305	7.319	341.305	C21 H41 O3	0.00419288	0.00998909	0.00414344	0.010563	0.00983206	0.00860912	0.00661184	0.00535344	0.00365766	0.0117672	0.00747198	0.00340295	0.00742154	0.0071404	0.00322247	0.00392419	0.00416828	0.00945123	0.00528166	0.0111187	0.0110319	0.00661634	0.00569661	0.00626592	0.00595915	0.0059739
128	MG(19:0)	MG(19:0)+NH4	MG(19:0)+NH4	MG	(19:0)	(19:0)			390.358	2.457	390.358	C22 H48 O4 N1	0.00136804	0.00162045	0.00170388	0.00102775	0.000816677	0.000928012	0.000656955	0.000659263	0.00141927	0.00118266	0.0011383	0.00110732	0.000786967	0.00126419	0.000883067	0.000930658	0.000738251	0.000867035	0.000770591	0.001845	0.00165368	0.00108467	0.00129489	0.00152997	0.00140337	0.00140941
129	MG(19:1)	MG(19:1)+NH4	MG(19:1)+NH4	MG	(19:1)	(19:1)			388.342	1.297	388.342	C22 H46 O4 N1	2.23167e-05	2.14993e-05	4.11487e-05	3.86018e-06	3.87246e-05	5.23433e-06	0.000115701	1.42785e-06	1.13753e-05	1.69374e-05	2.78225e-05	2.95076e-05	2.60488e-06	4.15538e-05	1.78029e-05	1.01401e-05	4.54348e-05	1.25416e-05	9.22497e-06	2.48182e-05	3.89244e-05	2.32553e-05	5.72392e-06	2.85706e-05	1.63191e-05	1.68712e-05
130	MG(19:1)	MG(19:1)+NH4	MG(19:1)+NH4	MG	(19:1)	(19:1)			388.342	1.598	388.342	C22 H46 O4 N1	1.05342e-05	7.53068e-05	7.78446e-06	3.06741e-06	5.7106e-06	1.76077e-05	3.62536e-06	1.51009e-06	0.000222582	5.93916e-06	3.53668e-05	1.19355e-05	3.86843e-06	6.4433e-06	4.97596e-06	1.88773e-05	5.56297e-06	2.11838e-06	4.3609e-06	1.23913e-05	4.96385e-06	7.54978e-06	4.6357e-06	1.1413e-05	7.8151e-06	7.95461e-06
131	MG(20:0)	MG(20:0)+NH4	MG(20:0)+NH4	MG	(20:0)	(20:0)			404.373	7.327	404.373	C23 H50 O4 N1	0.000590381	0.00123562	0.000474016	0.00126954	0.00138052	0.00127597	0.000852787	0.000695786	0.000414152	0.00151493	0.00097037	0.000404758	0.00132556	0.000959762	0.000284832	0.000460951	0.000419529	0.00141111	0.000654543	0.00134871	0.00168085	0.000895061	0.000758345	0.000994188	0.000867203	0.000873246
132	MG(21:1)	MG(21:1)+NH4	MG(21:1)+NH4	MG	(21:1)	(21:1)			416.373	6.187	416.373	C24 H50 O4 N1	4.23043e-05	3.06146e-05	4.98934e-05	6.73394e-06	4.02093e-05	6.39888e-05	1.98814e-05	9.85831e-05	1.14492e-05	3.38019e-05	3.9746e-05	6.01732e-06	8.29932e-05	5.14303e-05	4.49036e-06	4.12813e-05	3.73959e-05	3.85027e-05	4.44765e-05	5.20523e-05	3.99465e-05	3.98586e-05	3.49243e-05	5.22107e-05	4.29522e-05	4.33624e-05
133	MG(21:1)	MG(21:1)+NH4	MG(21:1)+NH4	MG	(21:1)	(21:1)			416.373	6.484	416.373	C24 H50 O4 N1	6.38507e-06	1.94794e-06	6.98133e-06	5.22826e-06	2.13389e-06	7.05343e-06	3.85017e-06	8.30135e-06	1.32825e-05	6.12525e-06	6.12892e-06	3.39124e-06	1.8434e-06	5.07529e-06	8.28893e-06	4.92225e-06	8.16401e-06	1.13207e-06	2.08098e-07	8.96188e-06	1.18077e-05	5.37949e-06	5.85078e-06	5.13226e-06	5.57091e-06	5.51798e-06
134	MG(22:2)	MG(22:2)+H	MG(22:2)+H	MG	(22:2)	(22:2)			411.347	6.319	411.347	C25 H47 O4	0.000185842	0.000346171	0.000287353	0.000284497	0.000428883	0.000360713	0.000263338	0.000205279	0.00024985	0.000507249	0.000311917	0.000386125	0.000287272	0.000487756	0.000211512	0.000330904	0.00017109	0.000269481	0.000277813	0.000364798	0.000371417	0.000315817	0.000297235	0.000324678	0.000309939	0.000310617
135	MG(23:0)	MG(23:0)+NH4	MG(23:0)+NH4	MG	(23:0)	(23:0)			446.42	5.457	446.42	C26 H56 O4 N1	0.000260146	0.000435696	0.000347187	0.000321722	0.00035691	0.00032696	0.000252924	0.000208966	0.000286059	0.000411543	0.000320811	0.000222988	0.000311315	0.000336003	0.000172286	0.000239753	0.000155432	0.000292039	0.000182355	0.000561767	0.00051092	0.000298486	0.000292813	0.000336466	0.000312998	0.000314093
136	MG(23:1)	MG(23:1)+H	MG(23:1)+H	MG	(23:1)	(23:1)			427.378	9.911	427.378	C26 H51 O4	0.0124904	0.0220194	0.021232	0.0172313	0.0269254	0.0231449	0.0170115	0.0125081	0.016128	0.0311088	0.01998	0.024398	0.0185273	0.031852	0.017232	0.0205478	0.0155259	0.0159264	0.0126853	0.0234099	0.0223491	0.0202454	0.0194285	0.0216595	0.0204573	0.0205151
137	MG(23:1)	MG(23:1)+NH4	MG(23:1)+NH4	MG	(23:1)	(23:1)			444.405	9.91	444.405	C26 H54 O4 N1	0.00656285	0.0110999	0.0106563	0.00897925	0.0127758	0.0108666	0.008105	0.00632825	0.00823469	0.0148188	0.00984275	0.0114954	0.00903274	0.0151552	0.00861155	0.0104442	0.00796777	0.00820816	0.00643212	0.0115135	0.0114395	0.01003	0.00899574	0.0103356	0.00961373	0.00964835
138	MG(23:1)	MG(23:1)+Na	MG(23:1)+Na	MG	(23:1)	(23:1)			449.36	9.909	449.36	C26 H50 O4 Na1	0.00909094	0.0151781	0.015204	0.0118597	0.019317	0.0167033	0.0122219	0.00955454	0.0124311	0.022176	0.0143737	0.0179349	0.0130099	0.0228628	0.0132972	0.0154944	0.0120009	0.0117023	0.00954711	0.0175998	0.0169502	0.01504	0.0140349	0.0158913	0.0148911	0.0149391
139	MG(26:1)	MG(26:1)+H	MG(26:1)+H	MG	(26:1)	(26:1)			469.425	15.117	469.425	C29 H57 O4	3.22379e-05	2.75775e-05	2.60097e-05	1.62097e-05	2.72142e-05	6.68425e-06	1.97481e-05	9.9817e-06	2.65263e-05	4.66045e-05	2.38794e-05	2.32277e-05	1.18381e-05	7.99191e-05	1.98172e-05	1.27121e-05	1.98462e-05	5.47226e-06	1.08354e-05	1.63549e-05	1.25107e-05	2.12534e-05	5.51993e-06	3.44111e-05	1.89045e-05	1.96118e-05
140	MG(27:1)	MG(27:1)+H	MG(27:1)+H	MG	(27:1)	(27:1)			483.441	6.568	483.441	C30 H59 O4	3.0513e-05	9.5478e-05	6.32791e-05	5.76928e-05	2.45278e-05	7.30805e-05	0.000238917	0.000142418	5.10932e-05	0.000271132	0.000104813	0.000142917	2.50886e-05	0.000163011	0.000102099	0.000446141	8.3556e-05	3.32513e-05	0.000144484	4.79375e-05	0.000161116	0.00013496	6.46611e-05	7.10161e-05	6.7643e-05	6.77734e-05
141	MG(27:1)	MG(27:1)+H	MG(27:1)+H	MG	(27:1)	(27:1)			483.441	6.702	483.441	C30 H59 O4	8.49335e-05	7.02319e-05	3.73022e-05	5.78863e-05	9.72692e-05	1.84808e-05	4.10315e-06	7.60866e-05	0.000146868	0.000775658	0.000136882	0.000125684	0.000100489	8.58415e-05	0.000165141	4.88916e-05	0.000125758	6.79999e-05	9.06112e-05	0.000144923	0.000147182	0.000110252	9.30211e-05	0.000298072	0.000187697	0.00019293
142	MG(27:1)	MG(27:1)+H	MG(27:1)+H	MG	(27:1)	(27:1)			483.441	6.886	483.441	C30 H59 O4	4.46741e-05	1.38215e-06	3.91136e-05	6.46819e-05	9.48509e-05	3.71849e-05	2.5345e-05	0.000121998	6.12251e-05	2.72589e-05	5.17715e-05	3.07518e-05	6.6343e-05	1.51428e-05	6.47205e-05	3.36027e-05	6.17553e-07	8.84251e-06	9.33552e-05	6.13807e-05	2.37479e-05	3.98505e-05	3.83954e-05	7.82821e-05	5.68529e-05	5.78434e-05
143	MG(28:1)	MG(28:1)+H	MG(28:1)+H	MG	(28:1)	(28:1)			497.456	6.943	497.456	C31 H61 O4	0.000200721	0.000397741	0.000318314	0.000553951	0.000307055	0.000281571	7.31383e-05	0.00998918	0.000184044	0.000730723	0.00130364	0.000268644	3.28326e-05	0.000539022	0.000139494	0.00040545	0.00025457	0.000219971	0.000256215	0.000185646	0.000869599	0.000317144	0.000338704	0.000532406	0.000428133	0.000433081
144	MG(28:1)	MG(28:1)+H	MG(28:1)+H	MG	(28:1)	(28:1)			497.456	7.105	497.456	C31 H61 O4	0.000168016	0.000228948	0.00036292	0.000207111	9.73566e-05	0.000151884	7.23461e-05	0.0002167	0.000874369	0.000186183	0.000256583	0.000349162	0.000239785	0.000100205	0.000311053	0.000151084	0.000494691	0.000734321	0.000117136	0.000212102	0.000210813	0.000292035	0.000156226	0.000787269	0.000447489	0.000463661
145	MG(28:1)	MG(28:1)+H	MG(28:1)+H	MG	(28:1)	(28:1)			497.456	7.29	497.456	C31 H61 O4	0.000264395	0.0348987	0.000210186	0.000827082	0.00011278	0.00100577	0.000439247	5.31487e-05	0.00174547	0.000736193	0.00402929	0.000961238	0.0167682	0.000151839	0.000320797	0.0322138	0.000783695	0.000638127	0.000733304	0.000470955	0.000440849	0.00534828	0.000354328	0.000358518	0.000356298	0.000356381
146	MG(29:1)	MG(29:1)+NH4	MG(29:1)+NH4	MG	(29:1)	(29:1)			528.499	7.302	528.499	C32 H66 O4 N1	0.000519421	0.018599	0.000171665	0.00033999	0.00018425	0.00025691	0.00058824	0.000254694	0.000435682	0.000408291	0.00217581	0.000291226	0.0119284	0.000162249	0.000586785	0.0041225	0.000752497	0.000324163	0.000153521	0.000580891	0.000549133	0.00194514	0.000298412	0.000256639	0.000279174	0.000278075
147	MG(29:1)	MG(29:1)+H	MG(29:1)+H	MG	(29:1)	(29:1)			511.472	7.296	511.472	C32 H63 O4	0.000433459	0.000148098	0.000544864	0.00118672	0.000492433	0.00102893	0.000668364	0.00103336	0.00132311	0.000990495	0.000784985	0.00134873	0.000789538	0.000210335	0.00158706	0.00238956	0.00116956	0.000745181	0.00105008	0.000795231	0.000520437	0.00106057	0.000503453	0.000451478	0.000479498	0.000478143
148	MG(29:1)	MG(29:1)+H	MG(29:1)+H	MG	(29:1)	(29:1)			511.472	7.367	511.472	C32 H63 O4	0.000111143	0.000298343	0.000285045	0.000827537	0.000777314	0.000949127	0.000927259	0.000356514	0.000280521	0.000246535	0.000505934	0.00038929	0.000220163	0.00116106	0.000998641	0.000514207	0.000909033	0.000273904	0.000377811	0.000172438	0.000102322	0.000511887	0.000434265	0.00111918	0.000750379	0.000767942
149	MG(29:1)	MG(29:1)+NH4	MG(29:1)+NH4	MG	(29:1)	(29:1)			528.499	7.359	528.499	C32 H66 O4 N1	9.74796e-06	0.000292178	9.82716e-05	0.000286978	0.000439979	7.59782e-05	0.000164293	0.000121515	0.000146682	0.000180743	0.000181637	0.000167436	0.000228257	0.000555227	0.000403878	0.000153844	0.00038958	0.000268561	0.000201738	0.00019879	9.07552e-05	0.000265807	0.000157338	0.000402253	0.000270408	0.000276667
150	MG(29:1)	MG(29:1)+NH4	MG(29:1)+NH4	MG	(29:1)	(29:1)			528.499	7.546	528.499	C32 H66 O4 N1	0.000155472	0.000439866	0.000100707	0.000275886	0.00054426	0.000261541	4.74622e-05	0.000445268	0.000495126	0.000159058	0.000292465	0.000398022	0.000275001	0.00103601	0.000195074	7.33419e-05	0.00027731	0.000239786	0.000191957	0.00051138	0.00017259	0.000337047	0.000617265	0.000645946	0.000630527	0.000631246
151	MG(29:1)	MG(29:1)+H	MG(29:1)+H	MG	(29:1)	(29:1)			511.472	7.684	511.472	C32 H63 O4	0.000720022	0.000410504	0.000349914	0.0010145	0.00034459	0.000216377	5.87093e-05	0.000167999	0.00059242	0.000670207	0.000454524	0.000636183	0.000646465	0.00082387	0.000549697	0.00046145	4.90562e-05	0.00035634	0.000855659	0.000420974	0.000448675	0.000524837	0.000230485	0.000370936	0.000295344	0.000298922
152	MG(30:1)	MG(30:1)+H	MG(30:1)+H	MG	(30:1)	(30:1)			525.488	8.216	525.488	C33 H65 O4	5.27697e-05	2.62856e-05	9.14157e-05	4.27563e-05	7.10833e-05	7.47361e-05	2.19971e-05	2.58568e-05	6.25205e-05	4.39881e-05	5.13409e-05	3.47732e-05	3.92863e-05	6.00407e-05	6.70944e-05	4.28984e-05	8.89581e-05	1.31753e-05	4.1459e-05	3.53045e-05	7.61483e-05	4.99138e-05	3.75356e-05	1.96613e-05	2.93372e-05	2.88447e-05
153	MG(30:1)	MG(30:1)+H	MG(30:1)+H	MG	(30:1)	(30:1)			525.488	8.396	525.488	C33 H65 O4	3.12344e-05	5.57395e-05	0.000158695	2.47395e-05	7.10363e-05	9.40272e-05	5.64785e-05	2.53559e-05	9.79273e-05	3.0117e-05	6.45351e-05	7.26515e-05	0.00024361	0.000150499	7.17918e-05	0.000102502	0.000160536	1.3959e-05	7.32085e-05	0.000160381	3.64063e-05	0.000108555	9.788e-05	0.000166171	0.000129443	0.000131165
154	MG(30:1)	MG(30:1)+NH4	MG(30:1)+NH4	MG	(30:1)	(30:1)			542.514	8.397	542.514	C33 H68 O4 N1	3.96911e-05	3.8001e-05	8.03345e-05	9.57718e-05	5.65309e-05	0.00020268	5.54947e-06	2.03308e-05	7.43548e-05	5.78306e-05	6.71075e-05	3.41391e-05	6.4531e-05	7.84296e-05	6.54173e-05	9.11294e-05	4.78152e-05	2.16061e-05	2.76296e-05	0.000206139	8.97235e-06	6.45809e-05	2.7326e-05	0.000105931	6.36521e-05	6.56365e-05
155	MG(30:1)	MG(30:1)+NH4	MG(30:1)+NH4	MG	(30:1)	(30:1)			542.514	8.525	542.514	C33 H68 O4 N1	7.54678e-05	0.000257429	0.000150218	3.62227e-05	7.40289e-05	5.70387e-05	9.33354e-05	8.30703e-05	4.8241e-05	1.96377e-05	8.94689e-05	0.00552589	3.24225e-05	7.01609e-05	4.74724e-05	0.000264588	0.000122346	7.12362e-05	5.09635e-05	5.6518e-05	2.13848e-05	0.000626299	0.000516723	4.52968e-05	0.000299196	0.000287072
156	MG(30:1)	MG(30:1)+H	MG(30:1)+H	MG	(30:1)	(30:1)			525.488	8.517	525.488	C33 H65 O4	7.00653e-05	1.27038e-05	7.41237e-06	7.20518e-05	0.000103527	7.91772e-05	0.00012111	0.000103834	0.000146318	2.2717e-05	7.38916e-05	0.000101955	0.00024361	0.000121042	6.11033e-05	9.00814e-05	0.00017866	0.000149517	8.03293e-05	7.91348e-05	9.29146e-05	0.000119835	0.000181563	0.000201876	0.000190981	0.000191473
157	MGDG(18:1/18:1)	MGDG(18:1_18:1)+Na	MGDG(36:2)+Na	MGDG	(18:1_18:1)	(18:1)	(18:1)		805.58	11.93	805.58	C45 H82 O10 Na1	0.000963109	0.00101271	0.00108833	0.00107889	0.000523157	0.0011647	0.000844363	0.000872347	0.00148005	0.00142989	0.00104576	0.0011134	0.000663302	0.00100095	0.000929526	0.00084692	0.000777224	0.000575223	0.00067528	0.00134498	0.000871493	0.00087983	0.000958422	0.00102075	0.000987195	0.000988788
158	MePC(32:2)	MePC(32:2)+NH4	MePC(32:2)+NH4	MePC	(32:2)	(32:2)			761.58	11.244	761.58	C41 H82 O8 N2 P1	0.0119444	0.00333953	0.00640737	0.00429615	0.00145094	0.0158367	0.0140828	0.000253551	0.0152513	0.00175141	0.00746141	0.0110976	0.00134234	0.00339842	0.00160324	0.00136255	0.00175572	0.00121346	0.000744285	0.0101039	0.000745727	0.00333673	0.00376417	0.00448861	0.00409838	0.00411705
159	MePC(33:0)	MePC(33:0)+Na	MePC(33:0)+Na	MePC	(33:0)	(33:0)			784.583	10.841	784.583	C42 H84 O8 N1 P1 Na1	0.00124498	0.000499464	0.000825464	0.000556199	0.00011865	0.00186281	0.00229929	8.22928e-05	0.00154505	0.000188927	0.000922313	0.00158424	0.000198646	0.000708348	0.000415532	0.000215931	0.000290836	0.000242232	0.000164128	0.00184304	0.000206157	0.000586909	0.00143162	0.0015265	0.0014754	0.00147784
160	MePC(33:1)	MePC(33:1)+Na	MePC(33:1)+Na	MePC	(33:1)	(33:1)			782.567	10.618	782.567	C42 H82 O8 N1 P1 Na1	0.00421037	0.000461524	0.00208637	0.00143115	0.000213857	0.00617854	0.00625838	2.45315e-05	0.0015963	0.000244864	0.00227059	0.0040366	0.000760201	0.00172107	0.000131156	0.00017174	0.000724638	0.000579872	0.000358985	0.00249403	0.000235296	0.00112136	0.00109495	0.00128058	0.00118062	0.00118539
161	MePC(33:1e)	MePC(33:1e)+Na	MePC(33:1e)+Na	MePC	(33:1e)	(33:1e)			768.588	11.107	768.588	C42 H84 O7 N1 P1 Na1	0.0007975	0.000282203	0.000392195	0.000476985	0.000138273	0.00174269	0.0007226	2.68672e-06	0.00167966	0.000125163	0.000635996	0.00108544	0.000124981	0.000134852	0.000139857	0.000354652	0.000195494	0.000213825	9.10449e-05	0.00111831	1.46736e-05	0.000347313	0.00033946	0.000533585	0.000429083	0.000434043
162	MePC(33:2e)	MePC(33:2e)+Na	MePC(33:2e)+Na	MePC	(33:2e)	(33:2e)			766.572	11.01	766.572	C42 H82 O7 N1 P1 Na1	0.000950395	0.000536398	0.000157956	0.000159786	2.14149e-05	0.000505156	0.00279524	1.42485e-05	0.000324684	0.000114279	0.000557955	0.00178962	0.000115927	0.000645774	0.000133131	0.000186857	0.000260622	0.000162858	2.51297e-05	0.00175904	8.46863e-05	0.000516365	0.000394233	0.000510411	0.000447883	0.000450842
163	MePC(34:1)	MePC(34:1)+Na	MePC(34:1)+Na	MePC	(34:1)	(34:1)			796.583	11.008	796.583	C43 H84 O8 N1 P1 Na1	0.000143806	6.66593e-05	6.26499e-05	8.01604e-05	2.10589e-05	0.000137997	0.000528444	1.68615e-12	0.000204763	8.31076e-06	0.000125385	0.000268869	4.06042e-05	8.95894e-06	2.96004e-05	7.7364e-06	2.93619e-05	8.56786e-06	1.28432e-06	5.49292e-05	6.11539e-06	4.56028e-05	6.91983e-05	3.16602e-05	5.1924e-05	5.09275e-05
164	MePC(35:0)	MePC(35:0)+Na	MePC(35:0)+Na	MePC	(35:0)	(35:0)			812.614	11.667	812.614	C44 H88 O8 N1 P1 Na1	0.000213873	7.68774e-05	8.72268e-05	0.000229886	4.32283e-05	0.000931047	1.87029e-05	8.57589e-06	0.000226531	0.000119104	0.000195505	0.000226089	0.000120638	9.0158e-05	9.05447e-05	6.22058e-05	4.76623e-06	4.32321e-05	3.94991e-05	0.000812423	3.8083e-05	0.000152764	0.000355325	0.000538832	0.000440048	0.000444735
165	MePC(35:1)	MePC(35:1)+Na	MePC(35:1)+Na	MePC	(35:1)	(35:1)			810.598	11.082	810.598	C44 H86 O8 N1 P1 Na1	0.000104124	2.55864e-05	0.00012807	1.34057e-05	1.42759e-05	0.000136505	0.000188816	4.27486e-06	5.91087e-05	1.11133e-05	6.8528e-05	0.000764691	9.93884e-06	2.84274e-05	2.10626e-05	4.5415e-05	4.03114e-05	1.81267e-05	1.87072e-05	0.000200024	3.90994e-06	0.000115061	4.0592e-05	2.0624e-05	3.14273e-05	3.08811e-05
166	MePC(35:1)	MePC(35:1)+Na	MePC(35:1)+Na	MePC	(35:1)	(35:1)			810.598	11.39	810.598	C44 H86 O8 N1 P1 Na1	0.00610925	0.00145595	0.0030398	0.00203631	0.000724254	0.00268496	0.00908235	0.00011679	0.0017605	0.00106553	0.00280757	0.00387257	0.000796134	0.00125299	0.000763805	0.000499018	0.000604983	0.00073142	0.000332573	0.00302209	0.000332798	0.00122084	0.00244161	0.00277594	0.00259585	0.00260447
167	MePC(35:2)	MePC(35:2)+Na	MePC(35:2)+Na	MePC	(35:2)	(35:2)			808.583	10.698	808.583	C44 H84 O8 N1 P1 Na1	0.0038278	0.000965022	0.00244715	0.0013633	0.000448409	0.00646764	0.00658447	2.59313e-05	0.00377376	0.000671301	0.00265748	0.00263369	0.000592859	0.00107149	0.000552193	0.00045116	0.000550729	0.000411787	0.000341218	0.00266457	0.000266078	0.000953578	0.00117858	0.00142998	0.0012946	0.00130105
168	MePC(35:2e)	MePC(35:2e)+Na	MePC(35:2e)+Na	MePC	(35:2e)	(35:2e)			794.602	11.171	794.603	C44 H86 O7 N1 P1 Na1	0.00210069	0.000718762	0.00113457	0.0012695	0.000359928	0.00321782	0.00211028	2.40348e-05	0.00409716	0.000443069	0.00154758	0.000884558	0.000373736	0.000282651	0.000496424	0.00120197	0.000500772	0.000811337	0.000260495	0.00294661	0.000104375	0.000786293	0.000787209	0.00076992	0.000779249	0.000778793
169	MePC(35:3)	MePC(35:3)+Na	MePC(35:3)+Na	MePC	(35:3)	(35:3)			806.567	10.416	806.567	C44 H82 O8 N1 P1 Na1	0.000296592	0.000112282	6.5752e-05	0.000202422	8.98754e-05	0.0005435	0.000494062	1.25506e-05	0.000263852	4.80455e-05	0.000212893	0.000136012	3.14442e-05	8.24228e-06	3.16061e-05	7.95369e-05	5.67104e-05	5.98492e-05	3.14532e-05	0.000174918	4.3969e-05	6.53741e-05	0.000562075	0.000648381	0.000601932	0.000604129
170	MePC(35:3e)	MePC(35:3e)+Na	MePC(35:3e)+Na	MePC	(35:3e)	(35:3e)			792.588	11.073	792.588	C44 H84 O7 N1 P1 Na1	0.00106945	0.00062723	0.000280207	0.000192463	1.77082e-05	0.00156788	0.0033763	8.96403e-06	0.00203267	0.000143834	0.000931671	0.0014874	0.000110226	0.000550467	0.000222695	0.000279907	0.000261899	0.000222637	2.53988e-05	0.00196302	0.000143362	0.000526702	0.000347662	0.000420056	0.000381108	0.000382942
171	PC(10:0e/6:0)	PC(10:0e_6:0)+H	PC(16:0e)+H	PC	(10:0e_6:0)	(10:0e)	(6:0)		496.34	3.354	496.34	C24 H51 O7 N1 P1	4.06569e-05	2.91937e-05	4.7179e-05	3.2586e-05	3.8044e-05	4.6878e-05	5.1415e-05	8.74312e-06	5.22819e-05	4.66219e-05	3.93599e-05	8.71855e-05	1.87924e-05	4.51668e-05	2.12255e-05	3.03438e-05	2.59115e-05	2.02052e-05	1.3687e-05	0.000107988	6.14594e-05	4.31965e-05	0.000164924	0.000175528	0.000169863	0.000170105
172	PC(15:0/15:0)	PC(15:0_15:0)+H	PC(30:0)+H	PC	(15:0_15:0)	(15:0)	(15:0)		706.536	10.365	706.538	C38 H77 O8 N1 P1	0.000945935	0.000233241	0.00094866	0.000358744	0.000112719	0.0013215	0.0019851	2.7304e-05	0.00102129	0.000156712	0.000711121	0.00152351	0.000132038	0.000503492	0.000272931	0.000126078	0.000192644	0.000173236	0.000128519	0.00201772	6.97655e-05	0.000513993	0.000304136	0.000367397	0.000333369	0.000334967
173	PC(18:0/13:0)	PC(18:0_13:0)+H	PC(31:0)+H	PC	(18:0_13:0)	(18:0)	(13:0)		720.554	10.779	720.554	C39 H79 O8 N1 P1	0.000214088	8.48026e-05	0.000175533	4.78152e-05	7.02617e-06	0.000329228	0.000459572	1.68615e-12	0.000264105	5.01557e-05	0.000163233	0.00044202	4.00361e-05	0.00011283	6.47341e-05	3.604e-06	2.61282e-05	3.43253e-05	3.55188e-06	1.30473e-05	1.64426e-06	7.41922e-05	7.52227e-05	0.000103282	8.82205e-05	8.89084e-05
174	PC(16:0/16:0)	PC(16:0_16:0)+H	PC(32:0)+H	PC	(16:0_16:0)	(16:0)	(16:0)		734.567	11.15	734.569	C40 H81 O8 N1 P1	0.00511643	0.00183454	0.00147332	0.00254922	0.000791174	0.00305744	0.0114453	0.000170765	0.00777512	0.00108458	0.00352979	0.00717121	0.000855602	0.00255246	0.00106079	0.000675892	0.00140261	0.00137496	0.000618306	0.00797448	0.000650534	0.00243368	0.00170489	0.00207716	0.00187667	0.00188624
175	PC(10:0e/22:0)	PC(10:0e_22:0)+H	PC(32:0e)+H	PC	(10:0e_22:0)	(10:0e)	(22:0)		720.59	11.642	720.59	C40 H83 O7 N1 P1	0.000148977	5.77469e-05	6.21009e-05	8.29878e-05	2.68875e-05	0.000230527	0.000153499	8.21456e-12	0.00035556	2.34875e-05	0.000114177	0.000569995	2.61362e-05	3.17961e-05	4.27628e-05	0.000147348	5.86282e-05	9.09152e-05	2.46891e-05	0.00101486	6.73522e-06	0.000201387	9.58161e-05	0.000105724	0.000100436	0.000100659
176	PC(18:0/14:1)	PC(18:0_14:1)+H	PC(32:1)+H	PC	(18:0_14:1)	(18:0)	(14:1)		732.551	10.503	732.554	C40 H79 O8 N1 P1	0.00288209	0.000788655	0.00241855	0.00111583	0.000392519	0.00415521	0.0048447	8.31772e-05	0.0037024	0.000594938	0.00209781	0.00343896	0.000403381	0.00140255	0.000656797	0.000347783	0.000651182	0.000394636	0.000308879	0.00545912	0.000251868	0.00133152	0.000914744	0.00110452	0.00100234	0.0010072
177	PC(8:1e/24:0)	PC(8:1e_24:0)+H	PC(32:1e)+H	PC	(8:1e_24:0)	(8:1e)	(24:0)		718.575	11.011	718.575	C40 H81 O7 N1 P1	4.29086e-06	3.23295e-05	1.9839e-05	1.05182e-05	3.18888e-06	4.09052e-05	0.000127071	1.68615e-12	4.73388e-05	6.32923e-06	2.91811e-05	0.0001143	2.65947e-06	2.85491e-06	2.70036e-05	4.15165e-06	4.12466e-06	9.1034e-06	1.45983e-06	0.000575446	2.4095e-12	7.41104e-05	2.40955e-05	3.41749e-05	2.87979e-05	2.90228e-05
178	PC(16:0e/16:1)	PC(16:0e_16:1)+H	PC(32:1e)+H	PC	(16:0e_16:1)	(16:0e)	(16:1)		718.575	11.559	718.575	C40 H81 O7 N1 P1	0.000143184	7.65977e-05	3.44115e-05	2.51383e-05	2.37776e-12	0.000238822	0.00052429	1.68615e-12	0.00045397	5.43346e-06	0.000150185	0.000601884	1.01264e-05	4.98322e-05	2.05475e-05	8.39229e-06	5.07702e-05	4.26673e-05	1.10342e-06	0.000722576	3.00623e-06	0.000151091	2.54822e-05	3.22995e-05	2.86792e-05	2.88203e-05
179	PC(18:0/15:0)	PC(18:0_15:0)+H	PC(33:0)+H	PC	(18:0_15:0)	(18:0)	(15:0)		748.585	11.465	748.585	C41 H83 O8 N1 P1	3.39666e-05	0.000221282	0.000567767	5.66977e-06	5.02669e-05	0.000601749	9.86828e-05	2.82707e-06	0.000504405	1.73336e-05	0.000210395	1.61123e-05	6.94284e-05	1.43613e-05	1.27879e-05	2.33301e-05	1.58187e-05	7.67264e-05	4.11151e-05	0.000588504	3.18749e-05	8.9006e-05	4.54937e-06	0.000159337	7.60337e-05	7.99735e-05
180	PC(19:1/14:0)	PC(19:1_14:0)+H	PC(33:1)+H	PC	(19:1_14:0)	(19:1)	(14:0)		746.569	10.871	746.569	C41 H81 O8 N1 P1	0.00051011	0.000203001	0.000377589	0.000222111	5.9931e-05	0.000706873	0.000803506	7.09488e-06	0.000622514	0.000116437	0.000362917	0.000677032	8.06471e-05	0.000361245	0.00036122	7.04809e-05	0.000145101	6.46073e-05	5.42377e-05	0.000794615	4.37291e-05	0.000265291	0.000152064	0.000204719	0.000176409	0.000177731
181	PC(18:0/16:0)	PC(18:0_16:0)+H	PC(34:0)+H	PC	(18:0_16:0)	(18:0)	(16:0)		762.601	11.906	762.601	C42 H85 O8 N1 P1	0.00139698	0.000702933	0.000973753	0.000562681	0.000119728	0.00101022	0.00214156	5.57772e-05	0.00180151	0.000261242	0.000902638	0.00123222	0.000273733	0.000367442	0.000238017	0.000257862	0.000231232	0.000214471	0.000103496	0.00158591	0.000186241	0.000469063	0.000381888	0.000642367	0.000502131	0.000508795
182	PC(18:0/16:1)	PC(18:0_16:1)+H	PC(34:1)+H	PC	(18:0_16:1)	(18:0)	(16:1)		760.582	11.239	760.585	C42 H83 O8 N1 P1	0.0261147	0.00775306	0.013871	0.00911252	0.00388374	0.0343543	0.029736	0.000632095	0.0332336	0.00411652	0.0162807	0.0244139	0.00353378	0.00773733	0.00370583	0.00338556	0.00423201	0.00285022	0.00196053	0.0234755	0.00199548	0.00772901	0.00810806	0.00977914	0.00887895	0.00892205
183	PC(18:0/16:1)	PC(34:1)+Na	PC(34:1)+Na	PC	(18:0_16:1)	(18:0)	(16:1)		782.567	11.249	782.567	C42 H82 O8 N1 P1 Na1	0.000991258	0.000143997	0.000874591	0.000458158	0.000228161	0.00238943	0.00155316	2.53086e-05	0.00212361	0.000244141	0.000903181	0.00112749	0.00015244	0.000355826	0.000225297	0.000162515	0.000199267	0.00014473	9.38438e-05	0.00133345	6.85405e-05	0.00038634	0.000376168	0.000491583	0.000429466	0.000432406
184	PC(12:0e/22:1)	PC(12:0e_22:1)+H	PC(34:1e)+H	PC	(12:0e_22:1)	(12:0e)	(22:1)		746.606	11.718	746.606	C42 H85 O7 N1 P1	0.000727823	0.000320937	0.000284792	0.000405969	0.000167518	0.00101511	0.000600218	9.40709e-06	0.00168502	0.000153068	0.000536986	0.00173921	0.000103405	0.000125116	0.000214934	0.000593131	0.0002493	0.000297763	9.82383e-05	0.0027729	4.51317e-05	0.000623913	0.000288242	0.000381353	0.000331251	0.000333615
185	PC(23:0/11:2)	PC(23:0_11:2)+H	PC(34:2)+H	PC	(23:0_11:2)	(23:0)	(11:2)		758.567	10.646	758.569	C42 H81 O8 N1 P1	0.00285682	0.00105998	0.0025462	0.00140731	0.000509105	0.00488126	0.00464024	0.000188831	0.00423133	0.000690473	0.00230115	0.00306247	0.000397723	0.00143803	0.00074718	0.000469956	0.000704665	0.000399491	0.000370795	0.00479744	0.000485085	0.00128728	0.00249054	0.00488717	0.0035965	0.00365807
186	PC(16:2e/18:0)	PC(16:2e_18:0)+H	PC(34:2e)+H	PC	(16:2e_18:0)	(16:2e)	(18:0)		744.59	11.639	744.59	C42 H83 O7 N1 P1	0.000279521	0.000108565	5.24684e-05	3.63982e-05	4.70236e-06	0.000351404	0.000589569	1.68615e-12	0.00066703	1.95399e-05	0.00021092	0.000695358	2.056e-05	0.000125954	3.9146e-05	6.04051e-05	4.67645e-06	4.22926e-05	1.75533e-12	0.000888995	1.13838e-05	0.000188877	0.000121709	0.000133623	0.000127254	0.000127529
187	PC(29:1/6:0)	PC(29:1_6:0)+H	PC(35:1)+H	PC	(29:1_6:0)	(29:1)	(6:0)		774.601	11.592	774.601	C43 H85 O8 N1 P1	0.00083218	0.00038174	0.000569623	0.000292165	1.99084e-05	0.00108025	0.00121095	5.34303e-06	0.000905774	0.000198051	0.000549598	0.000857143	0.000191598	0.000531098	0.000504098	9.96852e-05	0.000164855	0.000133652	0.000106503	0.000818056	0.000132502	0.000353919	0.000229572	0.000330666	0.000276268	0.000278835
188	PC(24:0/11:2)	PC(24:0_11:2)+H	PC(35:2)+H	PC	(24:0_11:2)	(24:0)	(11:2)		772.585	11.009	772.585	C43 H83 O8 N1 P1	0.000228726	0.000106327	0.000172624	8.15219e-05	4.28867e-05	0.000342949	0.000406049	7.12732e-06	0.000311854	5.50852e-05	0.000175515	0.000254813	4.27942e-05	0.000155644	0.000203411	3.90327e-05	8.26315e-05	2.7208e-05	2.81088e-05	0.000417063	3.17115e-05	0.000128242	0.000112024	0.000137814	0.000123973	0.000124604
189	PC(23:0/12:4)	PC(23:0_12:4)+H	PC(35:4)+H	PC	(23:0_12:4)	(23:0)	(12:4)		768.554	11.608	768.554	C43 H79 O8 N1 P1	0.000509497	4.54867e-05	0.000407844	8.97464e-05	4.22397e-05	0.000605613	0.000840427	1.68615e-12	0.000590053	4.43625e-05	0.000317527	0.000418541	4.87767e-05	9.0098e-05	4.80852e-05	2.67445e-05	0.000100912	2.39388e-05	2.87356e-05	0.000334175	9.1146e-06	0.000112912	0.000106043	0.000139341	0.000121457	0.00012228
190	PC(23:1/12:4)	PC(23:1_12:4)+H	PC(35:5)+H	PC	(23:1_12:4)	(23:1)	(12:4)		766.538	10.956	766.538	C43 H77 O8 N1 P1	3.46636e-05	7.9523e-06	7.62049e-05	2.15173e-05	2.40106e-06	8.85037e-05	0.000114296	1.68615e-12	7.92188e-05	2.79847e-12	4.24758e-05	4.24304e-05	1.42821e-12	1.06011e-05	7.72541e-06	2.09641e-12	1.81945e-05	1.53909e-12	1.81045e-06	4.08279e-05	2.4095e-12	1.2159e-05	1.4315e-05	2.17562e-05	1.78003e-05	1.79572e-05
191	PC(15:0/21:1)	PC(15:0_21:1)+H	PC(36:1)+H	PC	(15:0_21:1)	(15:0)	(21:1)		788.613	11.991	788.616	C44 H87 O8 N1 P1	0.00689807	0.0015428	0.00281546	0.00221427	0.00095155	0.0097634	0.00776768	0.000190037	0.00742601	0.00109711	0.00406664	0.00533558	0.000826642	0.00134132	0.00111039	0.000689439	0.000772397	0.00061012	0.000350723	0.00507942	0.00057033	0.00166864	0.00183312	0.00241501	0.00210163	0.00211659
192	PC(15:0/21:1)	PC(15:0_21:1)+Na	PC(36:1)+Na	PC	(15:0_21:1)	(15:0)	(21:1)		810.598	11.982	810.598	C44 H86 O8 N1 P1 Na1	9.4131e-05	9.79215e-05	3.4194e-05	0.000127195	4.64337e-05	0.00016136	1.79863e-05	5.93823e-06	0.000502463	6.36058e-05	0.000115123	0.000116198	1.18677e-05	7.2593e-05	1.66412e-05	9.49563e-06	4.39045e-05	6.76643e-06	8.25426e-06	0.000313161	2.0651e-05	6.19533e-05	5.40723e-05	3.06348e-05	4.33059e-05	4.2671e-05
193	PC(22:1/14:1)	PC(22:1_14:1)+H	PC(36:2)+H	PC	(22:1_14:1)	(22:1)	(14:1)		786.599	11.364	786.601	C44 H85 O8 N1 P1	0.00703495	0.00251267	0.00491113	0.00312381	0.00116588	0.00992231	0.0100413	0.000339994	0.0117191	0.00148781	0.0052259	0.00679321	0.00112481	0.00278826	0.00165148	0.00102686	0.00139604	0.000844619	0.000701049	0.00876972	0.00089132	0.00259874	0.00360459	0.00421194	0.00388478	0.00390044
194	PC(22:1/14:1)	PC(36:2)+Na	PC(36:2)+Na	PC	(22:1_14:1)	(22:1)	(14:1)		808.583	11.368	808.583	C44 H84 O8 N1 P1 Na1	0.000542572	0.000156562	0.000247341	0.000176355	6.17394e-06	0.000717556	0.000772015	7.9122e-06	0.000735001	8.86267e-05	0.000345011	0.000507137	9.06892e-05	0.000181236	9.60925e-05	8.71798e-06	7.74422e-05	4.06574e-05	3.24778e-05	0.000614156	1.47472e-05	0.000166335	0.000212596	0.000293209	0.000249841	0.000251882
195	PC(18:2e/18:0)	PC(18:2e_18:0)+H	PC(36:2e)+H	PC	(18:2e_18:0)	(18:2e)	(18:0)		772.621	11.797	772.621	C44 H87 O7 N1 P1	0.000263223	0.000125406	4.74786e-05	0.000110847	3.75225e-05	0.000289148	0.00021772	1.16438e-06	0.000454918	4.429e-05	0.000159172	0.000552836	2.24774e-05	1.08564e-05	7.55734e-05	0.000220656	4.13028e-05	7.37751e-05	3.33769e-05	0.000634699	1.68725e-06	0.000166724	8.29925e-05	0.000114468	9.75665e-05	9.83424e-05
196	PC(22:2/14:1)	PC(22:2_14:1)+H	PC(36:3)+H	PC	(22:2_14:1)	(22:2)	(14:1)		784.585	10.842	784.585	C44 H83 O8 N1 P1	0.00092205	0.000380118	0.000630377	0.000474077	0.000123301	0.000829952	0.00180965	6.93786e-05	0.00130528	0.000262457	0.000680664	0.00129154	0.000154777	0.000564835	0.00033212	0.000147064	0.000264177	0.000192592	0.000152006	0.00152425	0.000167516	0.000479087	0.00108636	0.00134161	0.00120416	0.00121071
197	PC(36:3e)	PC(36:3e)+H	PC(36:3e)+H	PC	(36:3e)	(36:3e)			770.606	11.701	770.606	C44 H85 O7 N1 P1	0.000104793	4.65454e-05	3.59626e-06	3.18605e-05	1.4775e-06	0.000164727	0.000206504	1.68615e-12	0.000356092	3.83622e-06	9.19432e-05	0.00033605	3.85212e-06	5.28818e-05	3.24347e-05	9.47221e-07	1.72031e-05	1.77027e-05	1.75533e-12	0.000459057	2.4095e-12	9.20129e-05	4.21001e-05	5.34994e-05	4.74109e-05	4.76701e-05
198	PC(24:0/12:4)	PC(24:0_12:4)+H	PC(36:4)+H	PC	(24:0_12:4)	(24:0)	(12:4)		782.567	10.615	782.569	C44 H81 O8 N1 P1	0.00421037	0.000337912	0.00208637	0.00143115	0.000342308	0.00617854	0.00625838	4.60009e-05	0.00128264	0.00020939	0.0022383	0.0040366	0.000760201	0.00172107	0.000196024	0.000223652	0.000724638	0.000579872	0.000358985	0.00249403	0.000235296	0.00113304	0.000825168	0.00128058	0.00103535	0.00104703
199	PC(24:0/12:4)	PC(24:0_12:4)+Na	PC(36:4)+Na	PC	(24:0_12:4)	(24:0)	(12:4)		804.551	10.614	804.551	C44 H80 O8 N1 P1 Na1	0.000207385	4.59498e-05	6.98206e-05	8.38915e-05	2.51161e-05	0.000335722	0.000382908	1.68615e-12	0.000213816	2.7521e-05	0.000139213	0.000234572	1.77926e-06	7.95019e-05	1.47022e-05	4.91508e-06	2.19535e-05	1.72521e-05	7.48257e-06	0.000145127	1.72755e-06	5.29013e-05	0.000135865	6.96219e-05	0.000105341	0.000103609
200	PC(18:2e/18:2)	PC(18:2e_18:2)+H	PC(36:4e)+H	PC	(18:2e_18:2)	(18:2e)	(18:2)		768.588	11.107	768.59	C44 H83 O7 N1 P1	0.0007975	0.000282203	0.000392195	0.000476985	0.000138273	0.00174269	0.0007226	2.68672e-06	0.00167966	0.000125163	0.000635996	0.00108544	0.000124981	5.11682e-05	0.000139857	0.000354652	0.000195494	0.000213825	9.10449e-05	0.00111831	1.46736e-05	0.000338944	0.00033946	0.000533585	0.000429083	0.000434043
201	PC(24:1/12:4)	PC(24:1_12:4)+H	PC(36:5)+H	PC	(24:1_12:4)	(24:1)	(12:4)		780.554	9.897	780.554	C44 H79 O8 N1 P1	0.000284078	7.26919e-05	0.000237222	0.00013982	2.35256e-05	0.000376734	0.000565949	9.86974e-07	0.000257625	3.65214e-05	0.000199515	0.000211222	3.95494e-05	9.69105e-05	3.96461e-05	9.45987e-06	4.60312e-05	4.63447e-05	1.26552e-05	0.000282606	4.22787e-06	7.88653e-05	6.39629e-06	9.97134e-06	8.09782e-06	8.15515e-06
202	PC(20:4e/16:1)	PC(20:4e_16:1)+H	PC(36:5e)+H	PC	(20:4e_16:1)	(20:4e)	(16:1)		766.575	11.013	766.575	C44 H81 O7 N1 P1	0.000871226	0.000508693	0.000335043	0.000151403	2.09958e-05	0.00139925	0.00250275	1.38956e-05	0.00130897	0.000113799	0.000722603	0.0015969	0.000111561	0.000602524	0.000129852	0.000181233	0.000249796	0.000154158	2.4785e-05	0.00160959	8.39086e-05	0.000474431	0.000359121	0.00045788	0.000404734	0.000407245
203	PC(17:1/21:1)	PC(17:1_21:1)+H	PC(38:2)+H	PC	(17:1_21:1)	(17:1)	(21:1)		814.632	12.065	814.632	C46 H89 O8 N1 P1	0.000410417	0.000149182	0.000335697	0.000177231	1.54124e-05	0.000202461	0.000533241	2.92649e-05	0.000664463	9.91096e-05	0.000261648	0.000201346	9.64237e-05	0.000139724	1.17542e-05	2.14346e-05	8.74345e-06	4.29487e-05	6.777e-06	0.000546283	4.50872e-06	0.000107994	0.000142778	0.000189232	0.000164262	0.000165424
204	PC(24:1/14:2)	PC(24:1_14:2)+H	PC(38:3)+H	PC	(24:1_14:2)	(24:1)	(14:2)		812.616	11.67	812.616	C46 H87 O8 N1 P1	0.000213871	7.69534e-05	7.34219e-05	0.000235772	2.85496e-05	0.000929926	0.000208908	3.04977e-06	0.000114332	7.42303e-05	0.000195901	0.00022757	1.93626e-05	5.21369e-06	1.57788e-05	3.67955e-05	4.30905e-05	1.24329e-05	3.70417e-05	0.000828475	3.79752e-05	0.000126374	0.000348975	0.000537017	0.000435791	0.000440594
205	PC(28:0/10:4)	PC(28:0_10:4)+H	PC(38:4)+H	PC	(28:0_10:4)	(28:0)	(10:4)		810.597	11.393	810.601	C46 H85 O8 N1 P1	0.00491267	0.00123704	0.0023833	0.00192063	0.000683076	0.0105487	0.00858392	0.000115925	0.00123144	0.000910838	0.00325275	0.0037223	0.00076391	0.00123322	0.000864374	0.000510272	0.000594933	0.000515808	0.00031234	0.00272691	0.000302466	0.00115465	0.00220432	0.00277379	0.00246708	0.00248173
206	PC(28:0/10:4)	PC(28:0_10:4)+Na	PC(38:4)+Na	PC	(28:0_10:4)	(28:0)	(10:4)		832.583	11.397	832.583	C46 H84 O8 N1 P1 Na1	0.000334276	7.18899e-05	0.000132563	9.97232e-05	3.03729e-05	0.000264906	0.000596282	1.68615e-12	0.000252805	5.1646e-05	0.000183446	0.000217322	3.87097e-05	6.64714e-05	2.60963e-05	2.6616e-05	3.33127e-05	2.41479e-05	1.62391e-05	0.000178214	1.06927e-05	6.37822e-05	0.000140428	0.000169263	0.000153781	0.000154491
207	PC(20:4e/18:0)	PC(20:4e_18:0)+H	PC(38:4e)+H	PC	(20:4e_18:0)	(20:4e)	(18:0)		796.621	11.89	796.621	C46 H87 O7 N1 P1	0.00112424	0.000247554	0.000368711	0.000593761	0.000218519	0.00159275	0.000616521	4.61961e-06	0.00180433	0.000172564	0.000674357	0.000468571	0.000139327	4.00107e-05	2.0377e-05	0.000176594	5.81612e-05	0.000101184	5.7983e-05	0.000303835	1.72457e-05	0.000138329	0.000214049	0.000258511	0.000234611	0.000235724
208	PC(26:1/12:4)	PC(26:1_12:4)+H	PC(38:5)+H	PC	(26:1_12:4)	(26:1)	(12:4)		808.582	10.698	808.585	C46 H83 O8 N1 P1	0.00393247	0.000962587	0.00244329	0.00138625	0.000454968	0.00616924	0.00668829	0.000105768	0.0036203	0.00067126	0.00264344	0.00263363	0.000539012	0.00107001	0.000537614	0.000449843	0.00054973	0.000411784	0.000162161	0.00266243	0.000266109	0.000928232	0.00117446	0.00142587	0.00129049	0.00129694
209	PC(26:1/12:4)	PC(26:1_12:4)+Na	PC(38:5)+Na	PC	(26:1_12:4)	(26:1)	(12:4)		830.567	10.696	830.567	C46 H82 O8 N1 P1 Na1	0.000208194	4.44901e-05	0.000115228	6.52891e-05	1.27204e-05	0.00026747	0.000415175	1.68615e-12	4.86706e-05	2.20127e-05	0.000119925	1.13401e-05	2.10816e-05	2.9478e-05	1.66676e-05	6.67189e-06	1.06384e-05	2.64805e-06	5.8618e-06	0.000135049	1.56252e-06	2.40999e-05	5.20354e-05	5.98257e-05	5.56803e-05	5.58471e-05
210	PC(20:4e/18:1)	PC(20:4e_18:1)+H	PC(38:5e)+H	PC	(20:4e_18:1)	(20:4e)	(18:1)		794.603	11.171	794.606	C46 H85 O7 N1 P1	0.00210069	0.000718762	0.00113457	0.0012695	0.000359928	0.00321782	0.00211028	2.40348e-05	0.00409716	0.000443069	0.00154758	0.00068765	0.000373736	0.000282651	0.000496424	0.00120197	0.000500772	0.000811337	0.000260495	0.00294661	0.000104375	0.000766602	0.000787209	0.00076992	0.000779249	0.000778793
211	PC(38:5e)	PC(38:5e)+H	PC(38:5e)+H	PC	(38:5e)	(38:5e)			794.606	11.763	794.606	C46 H85 O7 N1 P1	0.00073721	7.79843e-05	0.000198769	3.2315e-05	2.79942e-05	0.00120463	0.00120922	6.47785e-06	0.000920211	9.68969e-05	0.00045117	0.000777328	7.1888e-05	0.00018561	3.04545e-05	9.33735e-05	6.82822e-05	3.59954e-05	1.42136e-06	0.000372644	2.0595e-05	0.000165759	5.91484e-05	6.80764e-05	6.3318e-05	6.35142e-05
212	PC(16:0/22:6)	PC(16:0_22:6)+H	PC(38:6)+H	PC	(16:0_22:6)	(16:0)	(22:6)		806.569	10.405	806.569	C46 H81 O8 N1 P1	0.000288013	0.000109332	0.000227128	0.000188847	8.77287e-05	0.000473184	0.000473948	1.22329e-05	0.000249432	1.81535e-06	0.000211166	0.000163099	3.11624e-05	8.48334e-05	3.047e-05	7.71137e-05	5.40345e-05	5.64447e-05	2.9528e-05	3.68176e-05	4.29544e-05	6.06457e-05	0.000531938	0.000592815	0.000560061	0.000561605
213	PC(18:1e/20:5)	PC(18:1e_20:5)+H	PC(38:6e)+H	PC	(18:1e_20:5)	(18:1e)	(20:5)		792.588	11.077	792.59	C46 H83 O7 N1 P1	0.00106945	0.00062723	0.000280207	0.000192463	6.2414e-06	0.00156788	0.0033763	2.41775e-06	0.00203267	0.000143834	0.00092987	0.0014874	0.000110226	0.000550467	0.000222695	0.000279907	0.000261899	8.03459e-06	2.53988e-05	0.00196302	0.000143362	0.000505241	0.000347662	0.000420056	0.000381108	0.000382942
214	PC(28:0/12:4)	PC(28:0_12:4)+H	PC(40:4)+H	PC	(28:0_12:4)	(28:0)	(12:4)		838.632	11.915	838.632	C48 H89 O8 N1 P1	0.000249939	9.08101e-05	0.000185187	8.69955e-05	3.04362e-05	6.90929e-05	0.000384621	3.3609e-06	0.000283947	1.88069e-05	0.00014032	0.000315068	8.97804e-06	8.89885e-05	3.25289e-05	5.03339e-05	4.23584e-05	3.96713e-05	3.3081e-05	0.000307053	3.8723e-05	9.56784e-05	0.000113454	0.000122462	0.000117658	0.000117858
215	PC(18:0/22:5)	PC(18:0_22:5)+H	PC(40:5)+H	PC	(18:0_22:5)	(18:0)	(22:5)		836.616	11.421	836.616	C48 H87 O8 N1 P1	0.000585894	0.000171382	0.000470285	0.000198842	5.20395e-05	0.00081803	0.000421272	4.25684e-06	0.000510218	2.38432e-05	0.000325606	0.000426845	7.5674e-05	5.08063e-05	7.07541e-05	7.84802e-05	5.5812e-05	4.88814e-05	4.15006e-05	0.000556203	2.4996e-05	0.000142995	0.000233371	0.000160113	0.000199605	0.000197696
216	PC(18:0/22:6)	PC(18:0_22:6)+H	PC(40:6)+H	PC	(18:0_22:6)	(18:0)	(22:6)		834.601	11.213	834.601	C48 H85 O8 N1 P1	0.00024766	3.55096e-05	8.52833e-06	0.000134647	5.59025e-05	0.00011383	0.00027105	8.18041e-06	9.14074e-05	1.964e-05	9.86356e-05	4.53628e-05	1.13789e-05	1.53755e-05	9.66617e-06	4.32273e-05	4.40659e-06	6.26629e-06	1.61799e-05	0.000104914	2.5802e-05	2.82579e-05	0.000143908	0.000157925	0.000150423	0.000150752
217	PE(29:1)	PE(29:1)+H	PE(29:1)+H	PE	(29:1)	(29:1)			648.46	12.537	648.46	C34 H67 O8 N1 P1	0.00352466	0.0134023	6.61433e-05	0.0515351	0.00293648	0.000702436	0.11569	0.184517	0.0407205	0.00944546	0.042254	0.00040326	0.1446	0.0125773	0.196926	0.134783	0.197656	0.167288	0.181048	0.000318839	0.060404	0.1096	0.00336935	0.00210354	0.00278511	0.00275267
218	PE(29:1)	PE(29:1)+H	PE(29:1)+H	PE	(29:1)	(29:1)			648.46	12.774	648.46	C34 H67 O8 N1 P1	0.222464	0.0184177	0.0359809	0.0675653	0.0299785	0.0315241	0.0012152	0.00857839	0.00263589	0.0283494	0.0446709	0.00348487	0.00694377	0.0182975	0.00572962	0.0101531	0.00864706	0.0045934	0.00356732	0.00226974	0.00194657	0.0065633	0.282636	0.155694	0.224042	0.22079
219	PE(18:0/17:0)	PE(18:0_17:0)+Na	PE(35:0)+Na	PE	(18:0_17:0)	(18:0)	(17:0)		756.551	11.151	756.551	C40 H80 O8 N1 P1 Na1	0.000227349	7.77603e-05	9.29314e-05	9.366e-05	2.98682e-05	0.000323316	0.000466331	2.71083e-07	0.000359338	3.54312e-05	0.000170626	0.000353723	1.77271e-05	0.000150017	2.81649e-05	6.01558e-05	7.18368e-05	4.0599e-05	2.0572e-05	0.000379885	9.21602e-06	0.00011319	9.56888e-05	0.000148351	0.00012004	0.00012136
220	PE(18:0/18:1)	PE(18:0_18:1)+Na	PE(36:1)+Na	PE	(18:0_18:1)	(18:0)	(18:1)		768.551	11.607	768.551	C41 H80 O8 N1 P1 Na1	0.000510135	4.59852e-05	0.000408283	8.97813e-05	3.99781e-05	0.000605588	0.000861702	1.68615e-12	0.000589574	4.43544e-05	0.000319538	0.000418077	4.74578e-05	9.00889e-05	4.80683e-05	2.67841e-05	0.000102255	2.46306e-05	2.87314e-05	0.000334154	9.06526e-06	0.000112931	0.000106033	0.000139321	0.000121442	0.000122265
221	PE(18:1p/18:1)	PE(18:1p_18:1)+Na	PE(36:2p)+Na	PE	(18:1p_18:1)	(18:1p)	(18:1)		750.541	11.312	750.541	C41 H78 O7 N1 P1 Na1	0.000121882	2.02579e-05	7.36881e-06	4.25258e-05	3.27606e-07	0.000605576	0.0012345	1.33328e-06	0.000374809	1.25553e-05	0.000242114	0.000720768	9.93534e-07	0.000145204	0.000114305	1.99262e-05	0.000150775	1.39078e-05	5.92661e-06	0.000782297	1.55768e-06	0.000195566	6.16414e-06	0.000140861	6.83764e-05	7.18004e-05
222	PE(16:0p/20:4)	PE(16:0p_20:4)+H	PE(36:4p)+H	PE	(16:0p_20:4)	(16:0p)	(20:4)		724.528	11.267	724.528	C41 H75 O7 N1 P1	0.000207279	1.14169e-05	0.000113552	1.32867e-05	1.76124e-06	0.000254304	0.000471163	1.68615e-12	0.000300564	1.06292e-06	0.000137439	0.000277827	1.5392e-05	7.64375e-05	2.07229e-05	2.09641e-12	5.68087e-05	2.62964e-06	1.75533e-12	0.000229215	2.4095e-12	6.79033e-05	5.36928e-05	4.95708e-05	5.18403e-05	5.17013e-05
223	PE(24:1/13:0)	PE(24:1_13:0)+Na	PE(37:1)+Na	PE	(24:1_13:0)	(24:1)	(13:0)		782.567	11.247	782.567	C42 H82 O8 N1 P1 Na1	0.000991258	0.00011355	0.000874591	0.000458158	0.000228161	0.00238943	0.00155316	2.53086e-05	0.00212361	0.000244141	0.000900136	0.00112749	0.00015244	0.000355826	0.000225297	0.000162515	0.000199267	0.00014473	9.38438e-05	0.00133345	6.85405e-05	0.00038634	0.000376168	0.000491583	0.000429466	0.000432406
224	PE(37:2)	PE(37:2)+Na	PE(37:2)+Na	PE	(37:2)	(37:2)			780.551	10.665	780.551	C42 H80 O8 N1 P1 Na1	0.000171241	6.40527e-05	0.00011039	9.37057e-05	1.55085e-05	0.000328329	0.000255547	1.06061e-06	0.000216113	5.94464e-06	0.000126189	0.000186652	6.85293e-06	7.49259e-05	2.36167e-05	9.27987e-06	3.07934e-05	2.57742e-05	1.14001e-05	0.000301533	9.43133e-06	6.8026e-05	1.0477e-05	0.000105294	5.42853e-05	5.66855e-05
225	PE(24:1/14:3)	PE(24:1_14:3)+H	PE(38:4)+H	PE	(24:1_14:3)	(24:1)	(14:3)		768.554	11.608	768.554	C43 H79 O8 N1 P1	0.000509497	4.54867e-05	0.000407844	8.97464e-05	4.22397e-05	0.000605613	0.000840427	1.68615e-12	0.000590053	4.43625e-05	0.000317527	0.000418541	4.87767e-05	9.0098e-05	4.80852e-05	2.67445e-05	0.000100912	2.39388e-05	2.87356e-05	0.000334175	9.1146e-06	0.000112912	0.000106043	0.000139341	0.000121457	0.00012228
226	PE(18:0p/20:4)	PE(18:0p_20:4)+H	PE(38:4p)+H	PE	(18:0p_20:4)	(18:0p)	(20:4)		752.559	12.061	752.559	C43 H79 O7 N1 P1	0.000900726	3.49374e-05	0.000301409	9.99866e-05	2.33514e-05	0.000996858	0.000225074	7.44127e-07	0.000281345	2.71475e-05	0.000289158	0.000641151	2.35497e-05	2.64535e-06	5.27615e-05	2.17552e-06	1.74178e-05	1.27395e-05	1.54908e-05	0.000329549	4.61765e-06	0.00011021	0.000246937	0.0001862	0.000218949	0.000217362
227	PE(38:5e)	PE(38:5e)+H	PE(38:5e)+H	PE	(38:5e)	(38:5e)			752.559	12.061	752.559	C43 H79 O7 N1 P1	0.000900726	2.47561e-05	0.000170549	9.99866e-05	2.33514e-05	0.000996858	0.000548151	7.44127e-07	0.000281345	2.71475e-05	0.000307361	0.000641151	2.35497e-05	2.64535e-06	5.27615e-05	5.32231e-06	1.74178e-05	1.27395e-05	1.54908e-05	0.000329549	4.61765e-06	0.000110524	0.000246937	0.0001862	0.000218949	0.000217362
228	PE(18:1p/20:4)	PE(18:1p_20:4)+H	PE(38:5p)+H	PE	(18:1p_20:4)	(18:1p)	(20:4)		750.543	11.322	750.543	C43 H77 O7 N1 P1	0.000198905	2.18516e-05	5.45077e-05	5.22837e-06	1.68264e-06	0.000390864	0.000539216	7.69471e-07	1.8943e-05	7.91698e-06	0.000123988	0.000596902	5.51767e-06	0.000145384	0.0001019	1.43698e-05	0.000108514	5.23679e-06	1.75583e-06	0.000699745	1.32531e-06	0.000168065	6.16414e-06	0.000126089	6.15593e-05	6.4604e-05
229	PE(15:0/24:1)	PE(15:0_24:1)+Na	PE(39:1)+Na	PE	(15:0_24:1)	(15:0)	(24:1)		810.598	12.002	810.598	C44 H86 O8 N1 P1 Na1	1.05937e-06	1.15507e-05	0.000151934	3.75445e-06	7.98205e-06	0.000595979	0.000459789	5.61611e-06	8.5191e-05	1.32325e-05	0.000133609	0.000291256	4.42471e-05	1.08191e-05	5.58068e-05	3.25476e-05	1.37249e-05	4.00583e-05	6.58191e-06	0.000128539	2.16992e-05	6.4528e-05	9.83676e-05	0.000131122	0.000113531	0.00011434
230	PE(18:2/21:0)	PE(18:2_21:0)+Na	PE(39:2)+Na	PE	(18:2_21:0)	(18:2)	(21:0)		808.583	11.368	808.583	C44 H84 O8 N1 P1 Na1	0.000542572	0.000156562	0.000247341	0.000176355	6.17394e-06	0.000717556	0.000772015	7.9122e-06	0.000735001	8.86267e-05	0.000345011	0.000507137	9.06892e-05	0.000181236	9.60925e-05	1.00077e-05	7.74422e-05	4.06574e-05	3.24778e-05	0.000614156	1.47472e-05	0.000166464	0.000212596	0.000293209	0.000249841	0.000251882
231	PE(40:2)	PE(40:2)+H	PE(40:2)+H	PE	(40:2)	(40:2)			800.616	11.908	800.616	C45 H87 O8 N1 P1	0.000555822	0.000627159	0.000816964	0.000565013	0.000694391	0.000660281	0.000483735	0.00044724	0.000744397	0.000613667	0.000620867	0.000521734	0.000318309	0.000485959	0.000390267	0.000408732	0.000371282	0.000272345	0.000290722	0.000500657	0.000471154	0.000403116	0.000595781	0.000588456	0.000592427	0.000592222
232	PG(18:0/9:0)	PG(18:0_9:0)+NH4	PG(27:0)+NH4	PG	(18:0_9:0)	(18:0)	(9:0)		670.465	9.016	670.465	C33 H69 O10 N1 P1	0.000174262	0.000252257	0.000367909	0.000136668	0.000238926	0.000131025	0.000140542	9.27845e-05	0.000224762	0.000171261	0.00019304	0.000173683	0.000175357	0.000739708	0.000309644	0.000741174	0.000168848	0.000319799	0.000213014	0.000392333	0.000807817	0.000404138	0.000195219	0.000262518	0.00022632	0.000228019
233	PI(22:0/18:3)	PI(22:0_18:3)+NH4	PI(40:3)+NH4	PI	(22:0_18:3)	(22:0)	(18:3)		934.638	8.882	934.638	C49 H93 O13 N1 P1	0.00606171	0.00527976	0.0061429	0.00428644	0.00438066	0.0029115	0.00276433	0.0023422	0.0063434	0.00499716	0.00455101	0.00548822	0.00493032	0.00873565	0.00455492	0.00605395	0.00368734	0.0034617	0.00434736	0.00388516	0.00391473	0.00490594	0.00487372	0.00561103	0.00521382	0.00523286
234	PI(30:0/10:4)	PI(30:0_10:4)+Na	PI(40:4)+Na	PI	(30:0_10:4)	(30:0)	(10:4)		937.578	8.725	937.578	C49 H87 O13 N0 P1 Na1	7.1987e-05	0.000139089	0.000142287	6.20496e-05	1.03669e-05	9.30519e-05	0.000113344	5.90375e-05	0.000185511	8.38079e-05	9.60531e-05	0.000136938	0.000136377	0.000113258	0.000131564	0.000185813	0.000140456	9.32512e-05	0.000145142	0.000123741	0.000109919	0.000131646	0.000126352	0.000141377	0.000133332	0.000133687
235	PIP(38:2)	PIP(38:2)+H	PIP(38:2)+H	PIP	(38:2)	(38:2)			971.562	8.105	971.562	C47 H89 O16 N0 P2	0.0022098	0.00357315	0.00173132	0.003839	0.00457077	0.00303978	0.00324263	0.00100174	0.00468629	0.00418811	0.00320826	0.00348571	0.00323615	0.00484687	0.0031322	0.00525332	0.00427544	0.00386028	0.00268623	0.00330479	0.00275418	0.00368352	0.00340503	0.0036234	0.00350571	0.00351138
236	PMe(4:0/12:4)	PMe(4:0_12:4)+Na	PMe(16:4)+Na	PMe	(4:0_12:4)	(4:0)	(12:4)		453.165	1.583	453.165	C20 H31 O8 N0 P1 Na1	0.010214	0.019541	0.00213093	0.0304561	0.00359319	0.00177564	0.0100224	0.00983622	0.0107681	0.0124178	0.0110755	0.00669978	0.0030358	0.00378653	0.0117843	0.0138325	0.000986563	0.00157396	0.00781282	0.00323277	0.0217101	0.00744552	0.00135149	0.0125883	0.00653712	0.00682564
237	PMe(8:0e/16:0)	PMe(8:0e_16:0)+H	PMe(24:0e)+H	PMe	(8:0e_16:0)	(8:0e)	(16:0)		537.391	11.235	537.391	C28 H58 O7 N0 P1	0.000339973	0.000744128	0.000266563	0.000385577	0.000571378	0.00028483	0.000267903	0.00022038	0.000247969	0.000713804	0.000404251	0.000262171	0.000486762	0.00042542	0.000221966	0.000345192	0.000151758	0.000407061	0.000407515	0.00063374	0.000810807	0.000415239	0.000217915	0.000286256	0.000249496	0.000251222
238	PMe(18:0e/15:0)	PMe(18:0e_15:0)+H	PMe(33:0e)+H	PMe	(18:0e_15:0)	(18:0e)	(15:0)		663.53	12.92	663.532	C37 H76 O7 N0 P1	0.00942209	0.0165351	0.0231069	0.000154737	0.0239921	0.0198021	0.00985797	0.0104297	0.0286598	0.000579754	0.014254	0.0246939	0.000758623	0.000207139	0.0145721	0.0184354	0.0106455	0.00979083	0.0158275	0.0248593	0.0222626	0.0142053	0.0128432	0.000228523	0.00702121	0.00669764
239	PMe(18:0e/15:0)	PMe(18:0e_15:0)+H	PMe(33:0e)+H	PMe	(18:0e_15:0)	(18:0e)	(15:0)		663.532	13.041	663.532	C37 H76 O7 N0 P1	0.00942205	0.0165351	0.000117679	0.000961034	0.0239777	0.000233169	0.000244916	0.0104281	0.000251529	0.0187418	0.00809131	0.0019444	0.0116463	0.0139507	0.00190454	0.000915921	0.00983487	0.000151726	0.000823412	0.00142231	0.00279693	0.00453911	0.000489694	0.0117456	0.00568418	0.00597317
240	PMe(18:0e/15:0)	PMe(18:0e_15:0)+H	PMe(33:0e)+H	PMe	(18:0e_15:0)	(18:0e)	(15:0)		663.532	13.292	663.532	C37 H76 O7 N0 P1	0.000169966	0.000532787	0.00131898	0.000508718	0.0010538	0.00109795	0.000671729	0.000794106	0.00165095	0.000619907	0.000841889	0.00123385	0.000745431	0.000260656	0.000835599	0.00103168	0.000562305	0.000800415	0.00213451	0.000136476	0.00142207	0.000916299	0.00109393	0.000332454	0.000742523	0.000722968
241	SM(d34:0)	SM(d34:0)+H	SM(d34:0)+H	SM	(d34:0)	(d34:0)			705.591	10.665	705.591	C39 H82 O6 N2 P1	0.000318618	0.000123631	9.9576e-05	9.72208e-05	3.89697e-05	0.000294924	0.000356156	9.17917e-07	0.000225344	6.62079e-05	0.000162156	0.0011103	4.66178e-05	5.29554e-05	7.37036e-05	0.000233361	1.36941e-05	3.80977e-05	3.60776e-05	0.00334949	4.55791e-06	0.000495885	0.000154994	0.000188954	0.000170712	0.000171553
242	SM(d17:0/17:1)	SM(d17:0_17:1)+H	SM(d34:1)+H	SM	(d17:0_17:1)	(d17:0)	(17:1)		703.572	10.328	703.575	C39 H80 O6 N2 P1	0.000869488	0.000285359	0.000415168	0.000362374	9.66686e-05	0.00145519	0.00158899	2.44438e-05	0.00134351	0.000178475	0.000661967	0.00202288	0.000120625	0.000341644	0.000155648	0.000145643	0.000200274	0.000130507	7.47371e-05	0.00291746	9.1234e-05	0.000620065	0.000416264	0.00103363	0.000701205	0.000717034
243	SM(d34:2)	SM(d34:2)+H	SM(d34:2)+H	SM	(d34:2)	(d34:2)			701.559	9.584	701.559	C39 H78 O6 N2 P1	4.01067e-05	1.57959e-05	1.90681e-05	1.00435e-05	2.37776e-12	7.91147e-05	8.96627e-05	1.68615e-12	6.90515e-05	2.79847e-12	3.22843e-05	0.000191758	3.27209e-06	8.99739e-06	2.036e-12	2.09641e-12	2.20703e-06	1.53909e-12	7.40898e-07	0.000371159	2.4095e-12	5.78134e-05	0.000101054	0.000120982	0.000110298	0.000110778
244	SM(d20:0/16:1)	SM(d20:0_16:1)+H	SM(d36:1)+H	SM	(d20:0_16:1)	(d20:0)	(16:1)		731.606	11.187	731.606	C41 H84 O6 N2 P1	0.000295012	6.62598e-05	0.000110414	0.000132373	6.88789e-05	0.000413545	0.000453621	6.18021e-06	0.000396116	3.76684e-05	0.000198007	0.000314908	3.15538e-05	7.82896e-05	4.94281e-05	3.37361e-05	6.6163e-05	3.96779e-05	1.80354e-05	0.000221711	6.59382e-05	9.1944e-05	6.55737e-05	0.000275721	0.000162603	0.000167966
245	SM(d20:0/20:1)	SM(d20:0_20:1)+H	SM(d40:1)+H	SM	(d20:0_20:1)	(d20:0)	(20:1)		787.669	12.887	787.669	C45 H92 O6 N2 P1	6.77552e-06	1.5696e-05	8.15211e-05	0.000256169	1.52065e-05	1.26515e-05	0.000123129	9.45664e-06	0.000728364	1.91502e-05	0.000126812	0.0004418	0.000123115	0.000145066	0.000123905	0.00011191	0.000105004	7.03644e-05	3.68678e-05	0.000365383	6.11416e-05	0.000158456	0.000377579	0.000407478	0.000391413	0.000392157
246	SM(d42:1)	SM(d42:1)+H	SM(d42:1)+H	SM	(d42:1)	(d42:1)			815.7	13.284	815.7	C47 H96 O6 N2 P1	0.000326844	1.76767e-05	1.83371e-05	0.000177465	0.000321144	0.000515817	0.000247529	5.5194e-05	0.00028177	0.000100894	0.000206267	0.00065156	4.82751e-05	8.89554e-05	0.000115693	0.000219006	3.37078e-05	6.01996e-05	4.96272e-05	0.00174643	4.69571e-05	0.000306041	0.000165863	0.000168082	0.000166932	0.000166959
247	SM(d18:0/24:2)	SM(d18:0_24:2)+H	SM(d42:2)+H	SM	(d18:0_24:2)	(d18:0)	(24:2)		813.684	12.875	813.684	C47 H94 O6 N2 P1	0.000822735	0.000660843	0.000589178	0.00046748	0.000653483	0.00112626	0.00158046	2.89269e-06	0.00108628	0.000671829	0.000766144	0.00112498	0.000378878	0.000617663	0.000436796	0.000289251	0.000265224	0.000156466	0.000375317	0.00123507	0.000416871	0.000529652	0.00102703	0.000897975	0.000967479	0.00096416
248	SPH(d16:1)	SPH(d16:1)+H	SPH(d16:1)+H	SPH	(d16:1)	(d16:1)			272.258	3.737	272.258	C16 H34 O2 N1	0.000424663	0.000518327	0.000473173	0.000356064	0.000403806	0.000389965	0.000245538	0.000282197	0.000505278	0.000585502	0.000418451	0.00051538	0.000352298	0.000693043	0.00027873	0.000519546	0.000293538	0.000318566	0.000338529	0.000565127	0.00048116	0.000435592	0.000525731	0.000585032	0.000553127	0.00055463
249	TG(28:7)	TG(28:7)+NH4	TG(28:7)+NH4	TG	(28:7)	(28:7)			530.348	4.136	530.348	C31 H48 O6 N1	7.6058e-05	7.59717e-05	8.71062e-05	6.71393e-05	9.10276e-05	8.91662e-05	6.5269e-05	6.30429e-05	0.000103599	0.000105571	8.2395e-05	0.000103231	6.41757e-05	0.00013659	9.86956e-05	9.71542e-05	8.66705e-05	6.86607e-05	8.27389e-05	9.15763e-05	0.000109466	9.38959e-05	8.46169e-05	8.85943e-05	8.65008e-05	8.65707e-05
250	TG(12:0e/6:0/16:0)	TG(12:0e_6:0_16:0)+H	TG(34:0e)+H	TG	(12:0e_6:0_16:0)	(12:0e)	(6:0)	(16:0)	597.545	10.826	597.545	C37 H73 O5	3.55308e-06	0.000370937	0.000222191	0.000103059	0.00012104	2.24455e-05	8.56068e-05	4.14088e-05	1.96634e-05	1.61889e-05	0.000100609	0.000155694	3.27536e-05	0.000804982	5.05163e-05	0.00102995	0.000653384	0.000646605	0.000945092	0.0012751	0.00156191	0.000715598	0.000165717	5.58123e-06	9.18616e-05	8.772e-05
251	TG(12:0e/6:0/16:0)	TG(12:0e_6:0_16:0)+NH4	TG(34:0e)+NH4	TG	(12:0e_6:0_16:0)	(12:0e)	(6:0)	(16:0)	614.572	10.834	614.572	C37 H76 O5 N1	0.00273813	0.00194736	0.00547315	0.000132284	0.00379115	0.00258567	0.00223669	0.00285781	0.000237587	0.00118351	0.00231833	0.0416629	0.000621906	0.00118294	0.0273299	0.00246459	0.024093	0.0222147	0.0317017	0.000812084	0.00518801	0.0157272	0.00260873	0.000898839	0.00181958	0.00177571
252	TG(12:0e/6:0/16:0)	TG(12:0e_6:0_16:0)+H	TG(34:0e)+H	TG	(12:0e_6:0_16:0)	(12:0e)	(6:0)	(16:0)	597.545	11.034	597.545	C37 H73 O5	3.01359e-05	2.47835e-05	4.2959e-05	3.54138e-05	8.79226e-05	7.85443e-05	2.30134e-05	3.15496e-05	1.08337e-05	3.96607e-05	4.04817e-05	6.24656e-05	1.48196e-05	5.92219e-05	2.46824e-05	7.24261e-06	2.10523e-05	1.01013e-05	8.36169e-05	4.62602e-05	0.000118603	4.48066e-05	6.81379e-05	3.72269e-05	5.3922e-05	5.30956e-05
253	TG(12:0e/6:0/16:0)	TG(34:0e)+NH4	TG(34:0e)+NH4	TG	(12:0e_6:0_16:0)	(12:0e)	(6:0)	(16:0)	614.572	11.039	614.572	C37 H76 O5 N1	0.00126088	0.00133323	0.0494905	0.030311	0.00151015	0.0015455	0.0199586	0.0229285	0.000550974	0.00135502	0.0130244	0.000575619	0.0237989	0.000365695	0.000741708	0.000334815	0.000760079	0.000211616	0.00111732	0.00110743	0.00072287	0.00297361	0.00161923	0.0222106	0.0111218	0.0116506
254	TG(12:0e/6:0/16:0)	TG(12:0e_6:0_16:0)+H	TG(34:0e)+H	TG	(12:0e_6:0_16:0)	(12:0e)	(6:0)	(16:0)	597.545	11.105	597.545	C37 H73 O5	0.000565141	0.000697225	0.00106655	0.000921094	0.00133521	0.00049141	0.000424329	0.000678658	0.00139739	0.00110222	0.000867923	0.00119479	1.52042e-05	6.00744e-05	2.06774e-05	6.15175e-05	6.76083e-06	1.56339e-05	3.98062e-05	6.78121e-05	3.76014e-05	0.000151988	0.000733025	0.000622101	0.000681856	0.000678994
255	TG(14:0e/10:3/11:1)	TG(14:0e_10:3_11:1)+NH4	TG(35:4e)+NH4	TG	(14:0e_10:3_11:1)	(14:0e)	(10:3)	(11:1)	620.525	11.03	620.525	C38 H70 O5 N1	0.0180378	0.00142313	0.000820577	0.0207681	0.0287287	0.000444906	0.000314114	0.0177626	0.0341358	0.000441425	0.0122877	0.0292787	0.000172278	0.000216983	0.000811992	0.00016932	0.00140411	0.000709045	0.0219592	0.00338787	0.000830671	0.00589401	0.0225931	0.0289927	0.0255456	0.0257105
256	TG(12:0e/6:0/18:0)	TG(12:0e_6:0_18:0)+NH4	TG(36:0e)+NH4	TG	(12:0e_6:0_18:0)	(12:0e)	(6:0)	(18:0)	642.603	12.877	642.603	C39 H80 O5 N1	0.000264049	0.00125934	0.0023777	0.00100491	0.000582139	0.00210639	0.000501759	0.00988911	0.0266351	0.00105211	0.00456726	0.000350922	0.0145631	0.0146777	0.000357891	0.00116122	0.00014805	0.0105279	0.001371	0.0023961	0.00294498	0.00484989	0.0139243	0.000188134	0.00758469	0.00723236
257	TG(12:0e/6:0/18:0)	TG(12:0e_6:0_18:0)+NH4	TG(36:0e)+NH4	TG	(12:0e_6:0_18:0)	(12:0e)	(6:0)	(18:0)	642.603	13.015	642.603	C39 H80 O5 N1	0.0106124	0.0211446	0.000291941	0.000246627	0.0320771	4.68279e-05	5.47864e-05	0.000101428	0.000743752	0.000242871	0.00655624	0.024325	0.000249422	0.0129507	0.0135036	0.0192693	0.0102482	5.24764e-05	0.000761051	0.000378712	0.00106815	0.00828066	7.62138e-05	0.000275893	0.000168412	0.000173506
258	TG(36:3e)	TG(36:3e)+Na	TG(36:3e)+Na	TG	(36:3e)	(36:3e)			641.512	12.738	641.512	C39 H70 O5 Na1	0.000742005	0.000824556	0.00102625	0.000780867	0.000897101	0.000944784	0.000663436	0.000689383	0.00125838	0.00102691	0.000885368	0.00101594	0.00059194	0.00101331	0.00073043	0.000730434	0.000751978	0.000586588	0.000702902	0.00100871	0.000930239	0.000806246	0.000889491	0.000902599	0.000895554	0.000895881
259	TG(20:3e/6:0/11:1)	TG(20:3e_6:0_11:1)+NH4	TG(37:4e)+NH4	TG	(20:3e_6:0_11:1)	(20:3e)	(6:0)	(11:1)	648.556	12.917	648.556	C40 H74 O5 N1	0.000271692	0.000641999	0.001891	0.000165114	0.000754216	0.0153914	0.00773101	8.84025e-05	0.000222347	0.000459071	0.00276163	0.0195828	7.29098e-05	0.000184312	0.0109978	0.0138394	0.0075222	0.00790196	0.0120674	0.0183986	0.0199619	0.0110529	0.000307757	0.00848641	0.00408213	0.0042921
260	TG(38:0e)	TG(38:0e)+NH4	TG(38:0e)+NH4	TG	(38:0e)	(38:0e)			670.634	12.873	670.634	C41 H84 O5 N1	0.000930965	0.000239788	0.000444979	5.441e-05	0.00539762	0.00409322	0.00217598	0.00223219	0.000578271	6.56128e-05	0.0016213	0.0053744	0.00285706	0.000207086	0.00324913	0.00449182	0.000382052	0.00251931	0.00378995	0.000441835	0.00747335	0.0030786	0.0016695	0.00231159	0.0019658	0.0019823
261	TG(18:3/10:3/10:4)	TG(18:3_10:3_10:4)+NH4	TG(38:10)+NH4	TG	(18:3_10:3_10:4)	(18:3)	(10:3)	(10:4)	664.457	12.409	664.457	C41 H62 O6 N1	0.0320292	0.0250024	0.046529	0.0218941	0.00839242	0.0227727	0.0176462	0.0129644	0.0467529	0.0295829	0.0263566	0.0416469	0.0250664	0.0485363	0.0321578	0.0394383	0.00852402	0.0198474	0.0020733	0.0359012	0.0367452	0.0289937	0.0139169	0.0407411	0.0262954	0.0269845
262	TG(16:0e/11:2/11:4)	TG(16:0e_11:2_11:4)+H	TG(38:6e)+H	TG	(16:0e_11:2_11:4)	(16:0e)	(11:2)	(11:4)	641.514	12.738	641.514	C41 H69 O5	0.000614833	0.00082685	0.0010283	0.000771794	0.00095593	0.000939209	0.000647968	0.000674519	0.00121912	0.00102041	0.000869893	0.00100484	0.000585083	0.000982095	0.000799543	0.000736449	0.000748684	0.000588381	0.000656595	0.00096155	0.000931018	0.000799424	0.000882203	0.000847823	0.000866352	0.000865459
263	TG(15:0/8:0/16:0)	TG(15:0_8:0_16:0)+H	TG(39:0)+H	TG	(15:0_8:0_16:0)	(15:0)	(8:0)	(16:0)	681.603	11.077	681.603	C42 H81 O6	5.00928e-07	1.44693e-06	2.32831e-12	1.96546e-05	0.00046737	0.000104024	2.05606e-05	4.16274e-06	5.18625e-06	7.64365e-06	6.3055e-05	3.39105e-06	1.42821e-12	2.35304e-12	2.036e-12	3.81745e-07	1.61907e-06	1.26476e-06	1.75533e-12	2.23934e-12	2.4095e-12	6.65664e-07	3.40327e-05	4.39982e-05	3.86822e-05	3.89044e-05
264	TG(18:4/11:3/11:3)	TG(18:4_11:3_11:3)+H	TG(40:10)+H	TG	(18:4_11:3_11:3)	(18:4)	(11:3)	(11:3)	675.462	5.219	675.462	C43 H63 O6	0.000503108	0.000498146	0.00049548	0.000465185	0.000449468	0.000363274	0.000390051	0.000207092	0.000645274	0.00052142	0.00045385	0.0004289	0.000540595	0.000637878	0.000379914	0.000537746	0.000390963	0.000402715	0.000384421	0.000582169	0.00057477	0.000486007	0.000455295	0.000543827	0.000496184	0.000498435
265	TG(16:1e/6:0/20:5)	TG(16:1e_6:0_20:5)+NH4	TG(42:6e)+NH4	TG	(16:1e_6:0_20:5)	(16:1e)	(6:0)	(20:5)	714.603	5.706	714.603	C45 H80 O5 N1	0.000166358	0.000319056	0.000148436	0.000304417	0.000357549	0.000237436	0.000127998	0.000129319	0.000136922	0.000456877	0.000238437	0.000142713	0.000300651	0.000333868	9.87064e-05	9.63907e-05	8.94797e-05	0.000345239	0.000160916	0.000361945	0.000353431	0.000228334	0.00022518	0.000264743	0.000243481	0.000244468
266	TG(46:6e)	TG(46:6e)+NH4	TG(46:6e)+NH4	TG	(46:6e)	(46:6e)			770.666	7.319	770.666	C49 H88 O5 N1	6.98094e-05	0.000295253	4.07083e-05	0.000293332	0.000393361	0.000239089	0.000142104	9.79274e-05	4.14919e-05	0.000369187	0.000198226	2.78853e-05	0.000269075	0.000210993	2.82125e-05	3.00313e-05	2.59021e-05	0.000280446	7.87334e-05	0.000321037	0.000317646	0.000158996	0.000128278	0.000164194	0.000144899	0.00014579
267	TG(20:1/14:0/14:0)	TG(20:1_14:0_14:0)+NH4	TG(48:1)+NH4	TG	(20:1_14:0_14:0)	(20:1)	(14:0)	(14:0)	822.755	12.013	822.755	C51 H100 O6 N1	8.06302e-06	9.86203e-06	1.93004e-05	4.92185e-06	7.99157e-06	1.92106e-05	1.2233e-05	4.83817e-06	1.63895e-05	2.44118e-05	1.27222e-05	1.73056e-05	5.87299e-06	1.04107e-05	1.58465e-05	1.60408e-05	1.79565e-05	2.4492e-06	1.36122e-05	7.81315e-06	9.44758e-07	1.08252e-05	1.20275e-05	1.48218e-06	7.21244e-06	6.90738e-06
268	TG(16:0/16:0/16:1)	TG(16:0_16:0_16:1)+NH4	TG(48:1)+NH4	TG	(16:0_16:0_16:1)	(16:0)	(16:0)	(16:1)	822.755	12.391	822.755	C51 H100 O6 N1	1.61996e-05	2.17074e-05	1.86348e-05	1.40216e-05	0.00171929	1.31046e-05	1.01918e-05	5.26701e-06	7.31735e-06	1.01364e-05	0.000183587	5.98368e-07	5.23624e-06	8.48489e-06	1.526e-05	2.31581e-05	1.75705e-05	7.96695e-06	2.00323e-05	1.53734e-05	2.60951e-05	1.39776e-05	6.96151e-06	3.01918e-05	1.77336e-05	1.82957e-05
269	TG(16:0/16:0/16:1)	TG(16:0_16:0_16:1)+NH4	TG(48:1)+NH4	TG	(16:0_16:0_16:1)	(16:0)	(16:0)	(16:1)	822.755	12.76	822.755	C51 H100 O6 N1	1.75888e-05	4.32683e-06	1.83838e-05	5.7814e-06	1.11949e-05	1.1567e-05	0.00114481	8.02622e-06	1.08038e-05	2.35697e-05	0.000125606	0.00116092	8.65661e-06	7.38573e-06	1.19401e-05	1.4412e-05	1.32708e-05	8.80445e-06	1.39448e-05	4.75972e-06	8.59569e-06	0.000125269	9.1723e-06	1.21186e-05	1.05835e-05	1.06248e-05
270	TG(15:0/11:1/23:1)	TG(15:0_11:1_23:1)+NH4	TG(49:2)+NH4	TG	(15:0_11:1_23:1)	(15:0)	(11:1)	(23:1)	834.755	12.46	834.755	C52 H100 O6 N1	1.45871e-05	4.20334e-06	6.33613e-06	1.36459e-05	0.0007449	9.25735e-06	0.000698489	1.73884e-05	1.1153e-06	3.13614e-05	0.000154128	1.38454e-05	8.98222e-06	2.18461e-05	1.80938e-05	0.000801737	0.000850422	0.000568927	0.000713073	0.000620111	2.38072e-05	0.000364084	0.000883013	1.26607e-05	0.000481372	0.000459015
271	TG(18:0/15:0/17:0)	TG(18:0_15:0_17:0)+NH4	TG(50:0)+NH4	TG	(18:0_15:0_17:0)	(18:0)	(15:0)	(17:0)	852.801	11.312	852.801	C53 H106 O6 N1	1.18597e-05	1.01327e-05	9.36341e-06	2.39371e-05	2.5594e-05	5.68902e-05	2.63573e-05	3.62866e-05	0.000112326	0.00495058	0.000526333	1.11879e-05	1.91408e-05	3.52341e-05	1.69706e-05	1.95663e-05	4.88708e-06	1.28012e-05	1.18145e-05	1.885e-05	3.64581e-05	1.86911e-05	0.00304982	6.29785e-05	0.00167136	0.00159472
272	TG(18:0/16:0/16:0)	TG(18:0_16:0_16:0)+NH4	TG(50:0)+NH4	TG	(18:0_16:0_16:0)	(18:0)	(16:0)	(16:0)	852.801	11.504	852.801	C53 H106 O6 N1	8.48328e-06	5.33388e-06	1.32503e-05	0.00215554	2.58444e-05	0.00482299	1.95606e-05	0.00341713	3.39348e-05	2.8518e-05	0.00105306	1.51499e-05	1.46408e-05	5.6086e-05	1.34213e-05	3.3086e-05	2.23539e-05	1.83428e-05	6.61048e-06	3.32999e-05	0.00365001	0.0003863	4.78012e-05	9.77415e-06	3.03022e-05	2.92925e-05
273	TG(18:0/16:0/16:0)	TG(18:0_16:0_16:0)+NH4	TG(50:0)+NH4	TG	(18:0_16:0_16:0)	(18:0)	(16:0)	(16:0)	852.801	11.796	852.801	C53 H106 O6 N1	2.92826e-06	0.00107214	4.09556e-06	2.48021e-06	4.33633e-05	4.94496e-05	1.08831e-05	1.63037e-05	6.55498e-05	1.35022e-05	0.00012807	1.73809e-05	3.4545e-05	2.04301e-06	3.09629e-05	1.75955e-05	3.30697e-05	6.20064e-06	8.64686e-06	2.24843e-05	6.03945e-06	1.78968e-05	2.52114e-05	5.63255e-05	3.9621e-05	4.03859e-05
274	TG(50:2)	TG(50:2)+NH4	TG(50:2)+NH4	TG	(50:2)	(50:2)			848.77	11.923	848.77	C53 H102 O6 N1	3.19409e-05	1.75258e-05	1.16793e-05	5.75327e-06	2.38446e-05	1.00056e-05	2.38904e-05	1.27742e-05	1.07408e-05	6.6797e-06	1.54835e-05	2.79466e-05	6.3755e-06	3.88364e-05	3.61397e-06	1.36335e-05	7.18767e-06	4.9091e-06	6.61977e-06	1.16829e-05	7.57484e-06	1.2838e-05	1.4381e-05	1.45766e-05	1.45226e-05	1.44934e-05
275	TG(28:0/6:0/18:0)	TG(28:0_6:0_18:0)+NH4	TG(52:0)+NH4	TG	(28:0_6:0_18:0)	(28:0)	(6:0)	(18:0)	880.833	11.721	880.833	C55 H110 O6 N1	1.48397e-05	5.43267e-06	1.01372e-05	8.72237e-06	0.000992735	6.21104e-06	3.25584e-06	1.52799e-05	1.92479e-05	7.11004e-06	0.000108297	2.25705e-05	2.14105e-05	1.90871e-05	8.07783e-06	5.56432e-06	1.1598e-05	1.73689e-05	1.30704e-05	1.22821e-05	2.77647e-05	1.58794e-05	8.03947e-06	0.00292774	0.00135549	0.00143042
276	TG(18:0/16:0/18:1)	TG(18:0_16:0_18:1)+NH4	TG(52:1)+NH4	TG	(18:0_16:0_18:1)	(18:0)	(16:0)	(18:1)	878.817	12.623	878.817	C55 H108 O6 N1	7.22552e-06	8.37468e-06	1.25745e-05	3.1483e-06	5.90148e-06	1.6912e-06	5.10338e-06	4.01072e-06	1.59788e-05	0.00126349	0.00013275	5.23501e-06	4.69737e-06	1.78259e-05	9.10549e-06	0.00075402	8.25805e-06	1.11614e-05	9.40064e-06	0.000725832	5.69604e-06	0.000155123	2.60536e-05	5.81532e-06	1.67648e-05	1.62112e-05
277	TG(53:6e)	TG(53:6e)+Na	TG(53:6e)+Na	TG	(53:6e)	(53:6e)			873.731	11.387	873.731	C56 H98 O5 Na1	5.74695e-06	6.52679e-06	7.58357e-06	6.03083e-06	2.51501e-05	8.21174e-05	1.54114e-05	1.75415e-05	3.35638e-05	2.78215e-05	2.27494e-05	2.42555e-05	5.02052e-06	1.02006e-05	3.07101e-05	1.83697e-05	2.54176e-05	1.47529e-05	4.27575e-06	1.93809e-05	6.39125e-06	1.58775e-05	1.26569e-05	7.39087e-05	4.09752e-05	4.25136e-05
278	TG(53:6e)	TG(53:6e)+Na	TG(53:6e)+Na	TG	(53:6e)	(53:6e)			873.731	11.751	873.731	C56 H98 O5 Na1	2.15426e-06	5.29255e-06	9.77292e-07	9.15176e-06	0.000126658	1.23724e-05	2.03197e-05	8.34502e-06	4.84953e-05	5.1651e-05	2.85417e-05	2.69392e-05	1.3957e-05	3.30733e-06	3.0643e-05	8.38593e-06	8.1098e-06	9.21123e-06	1.43179e-05	2.3252e-05	2.38084e-05	1.61932e-05	8.9695e-06	1.03409e-05	9.65397e-06	9.65479e-06
279	TG(18:0/17:0/19:0)	TG(18:0_17:0_19:0)+NH4	TG(54:0)+NH4	TG	(18:0_17:0_19:0)	(18:0)	(17:0)	(19:0)	908.864	11.712	908.864	C57 H114 O6 N1	1.11955e-06	4.95014e-06	2.00656e-05	1.11348e-05	1.71188e-06	2.05579e-05	7.16915e-06	2.05042e-06	1.74606e-06	7.85605e-06	7.83615e-06	1.08779e-05	5.18295e-06	0.000155731	6.56776e-06	7.53018e-06	3.22498e-06	8.23931e-06	9.07115e-06	8.1161e-06	2.16619e-05	2.36203e-05	3.61097e-05	5.51492e-06	2.20411e-05	2.12219e-05
280	TG(18:0/12:0/24:0)	TG(18:0_12:0_24:0)+NH4	TG(54:0)+NH4	TG	(18:0_12:0_24:0)	(18:0)	(12:0)	(24:0)	908.864	11.923	908.864	C57 H114 O6 N1	2.26722e-07	5.8262e-06	2.54534e-06	1.41868e-05	9.01994e-06	3.21333e-06	8.32742e-06	3.70233e-06	3.99389e-06	4.65703e-06	5.5699e-06	6.93191e-06	3.20871e-06	4.42642e-06	6.86201e-06	2.38059e-06	1.29515e-06	2.39447e-06	1.09379e-05	7.42204e-06	6.08471e-06	5.19439e-06	4.86389e-06	7.53193e-06	6.14691e-06	6.18091e-06
281	TG(18:0/18:0/18:0)	TG(18:0_18:0_18:0)+NH4	TG(54:0)+NH4	TG	(18:0_18:0_18:0)	(18:0)	(18:0)	(18:0)	908.864	12.158	908.864	C57 H114 O6 N1	1.97924e-06	3.91931e-06	2.11883e-06	7.28138e-06	1.10075e-06	1.3063e-06	1.74729e-06	8.24385e-06	7.49991e-06	9.61515e-07	3.61584e-06	2.05565e-06	6.51171e-06	2.5766e-06	6.42775e-06	8.73416e-06	3.45198e-06	3.9528e-06	1.12438e-05	2.42424e-06	2.54553e-06	4.99242e-06	2.41784e-05	8.80043e-06	1.71326e-05	1.67038e-05
282	TG(18:0/18:0/18:0)	TG(18:0_18:0_18:0)+NH4	TG(54:0)+NH4	TG	(18:0_18:0_18:0)	(18:0)	(18:0)	(18:0)	908.864	12.547	908.864	C57 H114 O6 N1	5.78193e-06	3.87049e-06	7.60701e-06	1.31678e-05	1.28135e-05	1.0837e-05	5.60704e-06	4.82458e-06	1.86829e-05	2.27756e-05	1.05968e-05	1.92579e-05	8.09879e-06	9.38112e-06	2.0462e-05	1.2234e-05	6.71612e-06	1.35906e-05	9.79071e-06	3.1044e-05	4.05823e-06	1.34634e-05	1.70147e-05	1.01642e-05	1.39046e-05	1.36945e-05
283	TG(18:0/15:0/21:0)	TG(18:0_15:0_21:0)+NH4	TG(54:0)+NH4	TG	(18:0_15:0_21:0)	(18:0)	(15:0)	(21:0)	908.864	12.735	908.864	C57 H114 O6 N1	4.02305e-06	8.61342e-06	6.82489e-06	9.40037e-06	7.44627e-06	1.83881e-05	6.90796e-06	5.94026e-06	1.36596e-05	3.71604e-05	1.18364e-05	7.80579e-06	4.83499e-06	4.59311e-06	1.14885e-05	5.72264e-06	5.03032e-06	5.3336e-06	1.16816e-05	1.29623e-05	8.26565e-06	7.77185e-06	3.42702e-05	7.20537e-06	2.18307e-05	2.11021e-05
284	TG(18:0/14:1/22:0)	TG(18:0_14:1_22:0)+NH4	TG(54:1)+NH4	TG	(18:0_14:1_22:0)	(18:0)	(14:1)	(22:0)	906.848	11.682	906.848	C57 H112 O6 N1	2.30661e-05	3.33063e-05	5.4272e-06	7.77613e-06	3.08897e-06	2.26858e-06	1.41888e-06	1.93475e-06	1.05223e-05	3.40085e-06	9.221e-06	4.59525e-07	1.2905e-06	1.7792e-05	2.77636e-06	2.38018e-06	2.79042e-06	1.38022e-06	4.13114e-06	7.83618e-06	3.65491e-06	4.44915e-06	2.54219e-06	1.17195e-06	1.9617e-06	1.89195e-06
285	TG(16:1/14:0/24:0)	TG(16:1_14:0_24:0)+NH4	TG(54:1)+NH4	TG	(16:1_14:0_24:0)	(16:1)	(14:0)	(24:0)	906.848	12.051	906.848	C57 H112 O6 N1	7.93782e-06	4.2153e-06	2.25708e-06	4.45257e-06	1.26272e-06	4.50047e-06	8.50958e-06	5.66838e-06	1.45214e-06	4.93048e-06	4.51865e-06	1.92908e-06	2.05946e-06	1.26748e-06	3.0204e-06	3.19884e-06	2.54616e-06	1.60449e-06	1.57277e-06	3.65153e-06	2.43383e-06	2.3284e-06	5.08058e-06	2.2215e-06	3.8129e-06	3.705e-06
286	TG(16:1/14:0/24:0)	TG(16:1_14:0_24:0)+NH4	TG(54:1)+NH4	TG	(16:1_14:0_24:0)	(16:1)	(14:0)	(24:0)	906.848	12.274	906.848	C57 H112 O6 N1	4.53878e-05	1.09184e-05	2.43905e-07	5.9166e-06	1.09875e-07	5.7989e-06	3.81477e-06	3.64297e-06	3.85174e-06	2.45597e-06	8.21409e-06	3.88111e-07	5.70346e-06	1.18916e-06	1.73398e-06	3.53577e-07	1.25854e-06	3.79502e-06	2.18697e-06	3.66346e-06	2.37933e-06	2.26516e-06	1.66522e-06	4.00241e-06	2.79569e-06	2.8211e-06
287	TG(22:0/11:2/21:0)	TG(22:0_11:2_21:0)+NH4	TG(54:2)+NH4	TG	(22:0_11:2_21:0)	(22:0)	(11:2)	(21:0)	904.833	12.746	904.833	C57 H110 O6 N1	2.02676e-05	6.92147e-06	7.32515e-06	1.28889e-05	1.05895e-05	6.05995e-06	9.35259e-06	0.000623208	3.53353e-06	1.05382e-05	7.10685e-05	1.31438e-05	6.22457e-06	7.85104e-06	3.88859e-06	1.35472e-05	5.67187e-06	1.1694e-05	0.000517694	0.000519389	9.92466e-06	0.000110903	0.000883308	0.000803798	0.00084663	0.000844578
288	TG(15:0/19:0/20:3)	TG(15:0_19:0_20:3)+Na	TG(54:3)+Na	TG	(15:0_19:0_20:3)	(15:0)	(19:0)	(20:3)	907.773	13.04	907.773	C57 H104 O6 Na1	0.00252605	2.92498e-06	1.26295e-05	0.00165227	3.02554e-05	6.88914e-06	9.94647e-06	6.59544e-06	2.01689e-05	2.08543e-05	0.000428858	3.80765e-06	3.30698e-06	5.12211e-06	3.2269e-05	6.66183e-06	2.56585e-06	3.953e-06	1.26923e-05	4.83988e-06	3.13966e-06	7.83582e-06	1.06923e-05	2.36826e-05	1.67386e-05	1.70378e-05
289	TG(29:1/10:3/15:0)	TG(29:1_10:3_15:0)+Na	TG(54:4)+Na	TG	(29:1_10:3_15:0)	(29:1)	(10:3)	(15:0)	905.757	13.329	905.757	C57 H102 O6 Na1	0.000318606	1.13703e-05	1.64129e-05	4.11609e-05	4.69861e-05	5.50555e-05	3.14513e-05	3.16966e-05	1.88138e-05	2.24904e-05	5.94044e-05	3.10779e-05	2.0289e-05	4.3366e-05	2.69737e-05	1.71338e-05	3.49577e-05	1.52518e-05	2.41103e-05	7.90802e-06	2.54616e-05	2.4653e-05	8.25649e-05	4.87233e-05	6.6996e-05	6.60947e-05
290	TG(54:5)	TG(54:5)+NH4	TG(54:5)+NH4	TG	(54:5)	(54:5)			898.786	11.826	898.786	C57 H104 O6 N1	3.09726e-06	8.68285e-06	4.09516e-05	1.00332e-05	2.78887e-06	1.23085e-05	7.8665e-06	7.61567e-06	4.58711e-06	7.77443e-06	1.05706e-05	4.00303e-06	2.19992e-06	9.98243e-06	3.71114e-06	3.92171e-06	1.33342e-05	3.29126e-06	5.46586e-06	2.31944e-06	1.16135e-05	5.98425e-06	3.7101e-06	7.94351e-06	5.71556e-06	5.78973e-06
291	TG(18:1/14:1/22:6)	TG(18:1_14:1_22:6)+NH4	TG(54:8)+NH4	TG	(18:1_14:1_22:6)	(18:1)	(14:1)	(22:6)	892.739	11.785	892.739	C57 H98 O6 N1	4.6858e-06	1.26142e-06	4.42667e-06	1.85208e-05	1.6446e-05	3.48558e-06	3.63109e-06	3.6607e-06	8.70604e-06	8.92601e-06	7.37501e-06	1.6293e-05	1.63274e-05	1.96375e-05	1.1249e-05	3.115e-06	1.20052e-05	1.6881e-06	3.45372e-06	7.6082e-06	7.99776e-06	9.93749e-06	1.10453e-05	5.65105e-05	3.20783e-05	3.32113e-05
292	TG(18:1/14:1/22:6)	TG(18:1_14:1_22:6)+NH4	TG(54:8)+NH4	TG	(18:1_14:1_22:6)	(18:1)	(14:1)	(22:6)	892.739	11.959	892.739	C57 H98 O6 N1	3.34646e-06	7.14354e-06	1.66659e-05	4.76514e-06	1.07937e-06	1.60327e-05	3.73275e-06	6.13722e-05	1.1898e-05	7.13706e-06	1.33173e-05	9.24518e-06	5.74271e-06	0.000146223	1.24901e-05	2.78367e-06	1.53215e-05	7.12531e-06	3.84214e-06	1.80589e-06	1.4198e-06	2.05999e-05	1.09717e-05	4.92469e-06	8.23258e-06	8.04298e-06
293	TG(18:1/14:1/22:6)	TG(18:1_14:1_22:6)+NH4	TG(54:8)+NH4	TG	(18:1_14:1_22:6)	(18:1)	(14:1)	(22:6)	892.739	12.072	892.739	C57 H98 O6 N1	3.74901e-06	9.73809e-06	9.19901e-06	2.13508e-06	2.18545e-05	1.70767e-05	3.12362e-06	3.95685e-06	1.0474e-05	7.74193e-06	8.90487e-06	1.25713e-05	1.09966e-06	2.75919e-06	4.08353e-06	5.50461e-06	4.92205e-06	6.79836e-06	3.93274e-06	7.26337e-06	1.00622e-05	5.8997e-06	9.34361e-06	9.55781e-06	9.49403e-06	9.46515e-06
294	TG(16:0/16:1/24:0)	TG(16:0_16:1_24:0)+NH4	TG(56:1)+NH4	TG	(16:0_16:1_24:0)	(16:0)	(16:1)	(24:0)	934.88	11.631	934.88	C59 H116 O6 N1	4.89488e-06	6.76846e-06	8.37988e-06	2.38171e-05	2.50522e-05	5.0904e-06	4.15257e-06	1.67187e-06	1.35811e-06	2.79847e-12	8.11854e-06	6.54701e-06	2.7342e-06	2.93307e-06	1.31573e-06	3.09265e-06	1.27205e-06	2.8761e-06	3.77634e-06	5.93923e-06	1.36312e-06	3.18495e-06	1.2472e-05	2.48468e-06	7.91443e-06	7.62371e-06
295	TG(56:1)	TG(56:1)+NH4	TG(56:1)+NH4	TG	(56:1)	(56:1)			934.88	11.751	934.88	C59 H116 O6 N1	8.42669e-06	5.28062e-06	3.80373e-06	1.87386e-05	0.00676531	9.55456e-06	6.10325e-06	1.26218e-06	6.10511e-06	2.79847e-12	0.000682459	2.93693e-06	1.22161e-06	2.6356e-06	2.30356e-06	5.22848e-06	2.73515e-06	1.29558e-06	2.66464e-06	5.00366e-06	2.59495e-06	2.86201e-06	1.19201e-05	3.9076e-06	8.27391e-06	8.03388e-06
296	TG(56:1)	TG(56:1)+NH4	TG(56:1)+NH4	TG	(56:1)	(56:1)			934.88	11.921	934.88	C59 H116 O6 N1	1.47619e-05	5.46314e-06	2.52742e-06	0.00073176	3.20211e-05	1.89706e-05	7.21876e-06	2.14943e-06	9.21933e-06	8.93668e-06	8.33028e-05	3.03648e-06	2.7856e-06	7.18352e-06	6.20191e-06	4.5496e-06	4.78584e-06	2.87158e-06	1.09973e-06	3.15328e-06	3.42107e-06	3.90886e-06	2.44972e-05	8.88897e-06	1.73451e-05	1.69104e-05
297	TG(16:0/18:1/22:0)	TG(16:0_18:1_22:0)+NH4	TG(56:1)+NH4	TG	(16:0_18:1_22:0)	(16:0)	(18:1)	(22:0)	934.88	12.238	934.88	C59 H116 O6 N1	5.39143e-06	3.5043e-06	1.57656e-05	9.97009e-06	2.12327e-05	2.93529e-05	4.19316e-06	5.19586e-06	9.44606e-07	5.87741e-07	9.61383e-06	2.90474e-06	1.48457e-06	3.32051e-06	1.26614e-06	1.66673e-06	2.09045e-06	9.07358e-07	9.76162e-07	4.58048e-06	1.50264e-06	2.06998e-06	1.05243e-05	3.55584e-06	7.35995e-06	7.14668e-06
298	TG(16:1/20:5/20:5)	TG(16:1_20:5_20:5)+H	TG(56:11)+H	TG	(16:1_20:5_20:5)	(16:1)	(20:5)	(20:5)	897.697	11.747	897.697	C59 H93 O6	3.69675e-07	8.65286e-07	4.44749e-06	3.30679e-06	7.90598e-06	3.50793e-06	3.03887e-06	1.49831e-07	4.46433e-06	1.86766e-05	4.67328e-06	7.16074e-06	1.50137e-05	8.40108e-06	1.68394e-05	1.11209e-05	1.56743e-05	3.26593e-06	5.73838e-06	1.47097e-05	1.5089e-05	1.13013e-05	5.9085e-07	2.02417e-06	1.30424e-06	1.30642e-06
299	TG(16:1/18:1/22:0)	TG(16:1_18:1_22:0)+NH4	TG(56:2)+NH4	TG	(16:1_18:1_22:0)	(16:1)	(18:1)	(22:0)	932.864	12.66	932.864	C59 H114 O6 N1	0.00581145	2.79729e-05	9.24948e-06	5.5803e-06	5.4833e-06	4.57066e-06	3.47679e-06	1.68615e-12	4.47906e-06	1.03842e-05	0.000588265	7.69413e-06	1.42821e-12	1.52919e-06	6.33377e-06	2.6299e-06	8.15137e-06	1.53909e-12	1.75533e-12	9.82038e-06	3.87721e-07	3.65465e-06	1.59527e-06	4.41052e-06	2.94636e-06	2.98405e-06
300	TG(56:3)	TG(56:3)+NH4	TG(56:3)+NH4	TG	(56:3)	(56:3)			930.848	11.237	930.848	C59 H112 O6 N1	5.25672e-06	6.44322e-06	9.98685e-06	2.16142e-06	5.71236e-06	2.85452e-06	1.13755e-05	2.05704e-06	4.32971e-06	3.50243e-06	5.36798e-06	4.17711e-06	2.7382e-06	8.33839e-06	6.04137e-06	9.68556e-06	5.09931e-06	6.75313e-06	6.41932e-06	3.98314e-06	2.33483e-06	5.55704e-06	5.20669e-06	4.66369e-06	5.00784e-06	4.95941e-06
301	TG(20:0/18:1/18:2)	TG(20:0_18:1_18:2)+NH4	TG(56:3)+NH4	TG	(20:0_18:1_18:2)	(20:0)	(18:1)	(18:2)	930.848	11.927	930.848	C59 H112 O6 N1	3.56625e-06	3.83512e-06	3.05583e-06	7.62581e-07	7.63872e-06	3.42601e-06	1.93794e-06	1.44958e-06	1.28538e-05	6.5527e-06	4.50786e-06	8.29774e-06	1.43924e-06	1.97051e-06	4.48695e-07	1.41432e-07	2.28495e-06	5.11407e-06	4.85774e-06	1.10984e-05	6.12146e-07	3.62649e-06	2.94623e-06	6.83535e-06	4.79284e-06	4.85814e-06
302	TG(17:0/17:0/22:4)	TG(17:0_17:0_22:4)+NH4	TG(56:4)+NH4	TG	(17:0_17:0_22:4)	(17:0)	(17:0)	(22:4)	928.833	11.991	928.833	C59 H110 O6 N1	2.15502e-06	8.53271e-06	8.00335e-06	1.10647e-05	0.000117482	1.19659e-05	7.81984e-06	3.68624e-06	1.35738e-05	1.31668e-05	1.9745e-05	1.52956e-05	5.20554e-06	2.41427e-06	2.5261e-06	1.31623e-05	2.62846e-06	4.70654e-06	7.7177e-06	5.44898e-06	6.9113e-06	6.60168e-06	4.12751e-06	2.22405e-06	3.30088e-06	3.21748e-06
303	TG(25:1/11:1/20:5)	TG(25:1_11:1_20:5)+H	TG(56:7)+H	TG	(25:1_11:1_20:5)	(25:1)	(11:1)	(20:5)	905.759	13.325	905.759	C59 H101 O6	0.000916807	3.56277e-05	2.46586e-05	1.17478e-05	1.46798e-05	3.91966e-05	1.8615e-06	0.00077789	1.01585e-05	3.63043e-05	0.000186893	1.56587e-05	1.66177e-05	0.000994777	2.80209e-05	3.4778e-06	2.28663e-05	3.92291e-06	4.03965e-06	1.81007e-05	2.00813e-05	0.000112756	1.42574e-05	2.25667e-05	1.81434e-05	1.83225e-05
304	TG(25:1/11:2/20:5)	TG(25:1_11:2_20:5)+NH4	TG(56:8)+NH4	TG	(25:1_11:2_20:5)	(25:1)	(11:2)	(20:5)	920.77	11.536	920.77	C59 H102 O6 N1	4.7167e-06	1.10857e-06	2.40505e-06	1.17439e-06	3.62711e-06	5.06604e-07	1.07987e-06	1.02694e-06	1.31106e-06	1.66279e-07	1.71226e-06	1.11669e-06	3.23993e-06	2.35304e-12	1.25777e-06	3.0848e-06	2.76407e-06	2.18284e-07	2.1245e-06	3.83553e-06	5.63476e-06	2.32763e-06	1.40948e-06	3.30385e-06	2.3356e-06	2.34964e-06
305	TG(25:1/11:2/20:5)	TG(25:1_11:2_20:5)+NH4	TG(56:8)+NH4	TG	(25:1_11:2_20:5)	(25:1)	(11:2)	(20:5)	920.77	12.046	920.77	C59 H102 O6 N1	1.81945e-06	7.4134e-06	3.15515e-06	2.28819e-06	6.5848e-07	9.64581e-07	1.93919e-06	2.03865e-06	1.89066e-06	5.48534e-06	2.76531e-06	2.0905e-06	2.66317e-06	2.49031e-06	5.46797e-06	1.39958e-06	2.29495e-06	7.94349e-07	3.30551e-06	1.66696e-06	2.39826e-06	2.45716e-06	1.2479e-06	3.38115e-06	2.28427e-06	2.30444e-06
306	TG(22:0/14:3/22:0)	TG(22:0_14:3_22:0)+NH4	TG(58:3)+NH4	TG	(22:0_14:3_22:0)	(22:0)	(14:3)	(22:0)	958.88	13.013	958.88	C61 H116 O6 N1	3.06906e-06	0.010648	1.68357e-05	2.3595e-06	4.2758e-06	5.46582e-06	1.15971e-06	1.68615e-12	1.02627e-06	1.84652e-06	0.0010684	5.24397e-06	2.29428e-06	2.35304e-12	7.27173e-06	2.09641e-12	1.94335e-12	1.53909e-12	1.27878e-06	3.7674e-06	2.4095e-12	1.98562e-06	1.3553e-05	1.19363e-06	7.90073e-06	7.54914e-06
307	WE(4:0/14:1)	WE(4:0_14:1)+H	WE(18:1)+H	WE	(4:0_14:1)	(4:0)	(14:1)		283.263	5.387	283.263	H35 C18 O2	0.000513212	0.000747533	0.000548209	0.000288629	0.000516931	0.000579797	0.000465609	0.000420319	0.000505525	0.000964431	0.00055502	0.000376634	0.000555287	0.00050073	0.00062355	0.000662365	0.000530598	0.000243789	0.000374581	0.000451071	0.000891643	0.000521025	0.000516032	0.000582336	0.00054666	0.000548343
308	WE(3:0/17:0)	WE(3:0_17:0)+NH4	WE(20:0)+NH4	WE	(3:0_17:0)	(3:0)	(17:0)		330.337	0.737	330.337	H44 C20 O2 N1	0.00102399	0.000885935	0.00170783	0.000885053	0.00119775	0.00119874	5.11444e-05	0.000840138	0.00222058	4.57613e-05	0.00100569	7.78443e-05	0.000721996	0.00161756	9.91332e-05	9.55482e-05	7.32306e-05	0.000847956	0.000888872	0.00112992	0.00155491	0.000710697	0.00206849	0.00129545	0.00171171	0.00169188
309	WE(3:0/17:0)	WE(3:0_17:0)+NH4	WE(20:0)+NH4	WE	(3:0_17:0)	(3:0)	(17:0)		330.337	1.163	330.337	H44 C20 O2 N1	2.97528e-06	2.43272e-05	3.01951e-05	1.41158e-05	1.18903e-05	5.16204e-05	1.68473e-05	3.09546e-05	4.23699e-05	9.21606e-06	2.34512e-05	6.40048e-06	9.49176e-06	1.07538e-05	2.6505e-05	3.7126e-05	1.67921e-05	2.57401e-05	9.49508e-05	2.4653e-05	7.21442e-05	3.24557e-05	4.44061e-06	1.26703e-05	8.29029e-06	8.46708e-06
310	WE(7:0/13:0)	WE(7:0_13:0)+NH4	WE(20:0)+NH4	WE	(7:0_13:0)	(7:0)	(13:0)		330.337	3.453	330.337	H44 C20 O2 N1	1.21496e-05	3.10234e-05	4.68101e-05	2.82034e-05	6.54812e-05	1.93308e-05	2.90116e-05	1.22016e-05	2.29012e-05	0.000108592	3.75705e-05	2.51587e-05	4.17855e-05	1.07875e-05	1.44111e-05	2.63613e-05	2.35609e-05	2.96145e-05	6.02926e-05	5.31498e-05	4.93076e-05	3.3443e-05	6.72093e-05	6.76781e-05	6.74748e-05	6.74541e-05
311	WE(8:0/12:0)	WE(8:0_12:0)+NH4	WE(20:0)+NH4	WE	(8:0_12:0)	(8:0)	(12:0)		330.337	3.727	330.337	H44 C20 O2 N1	1.98363e-05	1.5641e-05	3.7988e-05	8.22879e-06	1.83566e-05	4.15087e-05	4.52442e-05	5.2119e-05	6.1928e-05	3.52537e-05	3.36104e-05	0.000100855	2.48152e-05	2.92942e-05	1.32636e-05	7.05313e-05	3.27099e-05	4.71007e-05	1.5856e-05	1.44982e-05	2.92525e-05	3.78176e-05	4.67552e-05	1.58785e-05	3.2556e-05	3.17299e-05
312	WE(4:0/16:0)	WE(4:0_16:0)+NH4	WE(20:0)+NH4	WE	(4:0_16:0)	(4:0)	(16:0)		330.337	3.947	330.337	H44 C20 O2 N1	0.00939366	0.00943819	0.00914405	0.00821027	0.00974595	0.00768942	0.00658143	0.00560442	0.00889244	0.0078214	0.00825212	0.0209837	0.00787931	0.00719656	0.0151769	0.0152867	0.0125818	0.00792036	0.00611192	0.0131132	0.00933692	0.0115587	0.00944104	0.00971156	0.00956553	0.00957271
313	WE(7:0/13:0)	WE(7:0_13:0)+NH4	WE(20:0)+NH4	WE	(7:0_13:0)	(7:0)	(13:0)		330.337	3.951	330.337	H44 C20 O2 N1	0.00348143	0.00403901	0.00522268	0.00349157	0.00360475	0.00411318	0.00216111	0.00194302	0.00419095	0.00407884	0.00363266	0.00194626	0.00219144	0.00389959	0.0151632	0.00263953	0.00203926	0.00271902	0.00195372	0.00572929	0.00410029	0.00423816	0.00404779	0.00304915	0.00358682	0.00356125
314	WE(5:0/15:0)	WE(5:0_15:0)+NH4	WE(20:0)+NH4	WE	(5:0_15:0)	(5:0)	(15:0)		330.337	6.71	330.337	H44 C20 O2 N1	1.42728e-05	2.44609e-05	3.31287e-05	4.22979e-05	1.45654e-05	1.29795e-05	1.99693e-05	4.16103e-05	3.35894e-05	3.3393e-05	2.70267e-05	2.49914e-05	1.4359e-05	0.000103037	2.33903e-05	2.25559e-05	3.13691e-06	1.62593e-05	6.98485e-05	1.77052e-05	4.49245e-05	3.40208e-05	2.64474e-05	5.84949e-05	4.12877e-05	4.20767e-05
315	WE(5:0/15:0)	WE(5:0_15:0)+NH4	WE(20:0)+NH4	WE	(5:0_15:0)	(5:0)	(15:0)		330.337	7.282	330.337	H44 C20 O2 N1	7.33071e-06	4.94371e-05	8.38572e-05	6.87337e-05	0.000139066	0.000101272	3.65882e-05	2.33333e-05	2.12906e-05	0.000125928	6.56835e-05	0.000115167	2.67657e-05	0.000145121	1.27753e-05	4.26762e-05	4.57884e-05	6.78142e-05	2.04781e-05	0.000329251	7.37369e-05	8.79574e-05	7.67843e-05	7.24285e-05	7.48229e-05	7.46786e-05
316	WE(6:0/14:0)	WE(6:0_14:0)+NH4	WE(20:0)+NH4	WE	(6:0_14:0)	(6:0)	(14:0)		330.337	9.011	330.337	H44 C20 O2 N1	1.31258e-05	4.63938e-05	4.47886e-05	1.1295e-05	2.80437e-05	4.04038e-05	1.0323e-05	4.00429e-05	2.92666e-05	7.70058e-05	3.40689e-05	1.70836e-05	7.12851e-05	5.18143e-05	4.41314e-05	4.67668e-05	3.56342e-05	1.99208e-05	4.57113e-05	0.000478434	2.60679e-05	8.36849e-05	2.76846e-05	1.95889e-05	2.39993e-05	2.37576e-05
317	WE(6:0/14:0)	WE(6:0_14:0)+NH4	WE(20:0)+NH4	WE	(6:0_14:0)	(6:0)	(14:0)		330.337	9.259	330.337	H44 C20 O2 N1	9.1389e-07	6.66562e-06	8.67073e-06	2.81944e-05	6.32755e-05	2.17395e-05	1.22434e-05	1.56842e-05	2.53056e-05	1.43722e-05	1.97065e-05	2.24261e-05	2.82422e-05	4.7032e-05	3.39905e-05	2.88922e-05	7.12857e-05	2.35855e-05	1.54736e-05	2.88318e-05	1.88517e-05	3.18611e-05	2.68199e-05	6.08234e-05	4.25628e-05	4.3402e-05
318	WE(2:0/18:0)	WE(2:0_18:0)+NH4	WE(20:0)+NH4	WE	(2:0_18:0)	(2:0)	(18:0)		330.337	10.982	330.337	H44 C20 O2 N1	1.81433e-05	2.7868e-05	8.18461e-05	2.80371e-05	4.38028e-05	0.00237073	2.43165e-05	2.06744e-05	6.35583e-05	2.91638e-05	0.000270814	5.58281e-05	5.41492e-05	3.33773e-05	3.56918e-05	3.74693e-05	2.633e-05	2.4091e-05	2.44149e-05	4.83505e-05	5.30419e-05	3.92744e-05	2.33578e-05	5.93626e-05	4.00245e-05	4.0915e-05
319	WE(2:0/18:0)	WE(2:0_18:0)+NH4	WE(20:0)+NH4	WE	(2:0_18:0)	(2:0)	(18:0)		330.337	11.189	330.337	H44 C20 O2 N1	0.00504044	0.000204408	0.0110386	0.00871159	0.00633548	4.62916e-05	1.76147e-05	5.21171e-05	7.29994e-05	2.57991e-05	0.00315453	0.014496	0.00838797	3.4008e-05	0.00637218	4.56522e-05	3.32217e-05	3.07136e-05	5.66752e-05	0.00118771	3.21234e-05	0.00306762	0.00646251	0.000227682	0.003585	0.00342507
320	WE(4:0/18:0)	WE(4:0_18:0)+NH4	WE(22:0)+NH4	WE	(4:0_18:0)	(4:0)	(18:0)		358.368	6.7	358.368	H48 C22 O2 N1	5.59233e-05	3.68592e-05	0.00010856	8.22751e-05	2.41229e-05	2.20055e-05	5.80659e-05	7.91086e-05	7.72404e-05	3.61629e-05	5.80324e-05	2.21732e-05	2.2552e-05	0.000317905	9.77666e-05	7.16875e-05	1.59848e-05	1.06249e-05	0.000121246	0.000101006	7.93021e-05	8.60248e-05	4.3876e-05	0.000108594	7.37925e-05	7.54208e-05
321	WE(4:0/18:0)	WE(4:0_18:0)+NH4	WE(22:0)+NH4	WE	(4:0_18:0)	(4:0)	(18:0)		358.368	6.827	358.368	H48 C22 O2 N1	9.06685e-05	7.21043e-05	0.000128914	1.89329e-05	0.000133251	0.000123945	8.64653e-05	0.000102771	9.96006e-05	0.000375221	0.000123187	0.000160053	0.000104255	0.000124518	0.00022912	0.000116589	0.00012776	2.30481e-05	8.32169e-05	7.17578e-05	2.74845e-05	0.00010678	6.08005e-05	2.00049e-05	4.20233e-05	4.09429e-05
322	WE(3:0/19:2)	WE(3:0_19:2)+NH4	WE(22:2)+NH4	WE	(3:0_19:2)	(3:0)	(19:2)		354.337	3.472	354.337	H44 C22 O2 N1	0.000215429	0.00031639	0.00030445	0.000167702	0.000154035	0.000157296	0.000110811	0.00010485	0.000233041	0.000207893	0.00019719	0.000221303	0.000130335	0.000202029	0.000137796	0.000131504	0.000115781	0.000139293	0.000116607	0.000306335	0.000261006	0.000176199	0.000194319	0.000215612	0.000204189	0.000204707
323	WE(2:0/20:3)	WE(2:0_20:3)+NH4	WE(22:3)+NH4	WE	(2:0_20:3)	(2:0)	(20:3)		352.321	1.889	352.321	H42 C22 O2 N1	3.24514e-06	3.74921e-06	3.54816e-05	1.36417e-06	2.25144e-06	1.52914e-05	1.6008e-05	2.12714e-05	9.39804e-06	6.58492e-06	1.14645e-05	1.83237e-06	8.37682e-06	8.18504e-06	1.64689e-05	6.56843e-06	5.45468e-06	2.1753e-06	1.35991e-06	4.9503e-07	3.72068e-06	5.46371e-06	2.17827e-07	1.24902e-05	5.93332e-06	6.21379e-06
324	WE(2:0/20:3)	WE(2:0_20:3)+NH4	WE(22:3)+NH4	WE	(2:0_20:3)	(2:0)	(20:3)		352.321	1.955	352.321	H42 C22 O2 N1	1.68918e-06	1.04679e-06	1.69752e-06	1.01745e-06	2.93171e-06	1.60361e-06	3.58774e-06	4.67983e-06	1.81697e-05	6.47325e-06	4.28968e-06	4.50863e-06	1.59229e-06	3.96216e-06	3.05071e-06	1.36937e-06	4.10298e-06	1.21309e-06	4.65207e-06	6.47095e-06	3.16139e-06	3.40836e-06	3.20958e-06	6.5918e-07	2.08443e-06	1.9844e-06
325	WE(2:0/20:3)	WE(2:0_20:3)+NH4	WE(22:3)+NH4	WE	(2:0_20:3)	(2:0)	(20:3)		352.321	2.222	352.321	H42 C22 O2 N1	6.30642e-06	2.85071e-07	7.54053e-06	9.15284e-07	4.41771e-05	2.85122e-07	2.96834e-06	3.29041e-07	1.37817e-06	3.20198e-07	6.45053e-06	3.31016e-06	2.75364e-06	6.44856e-06	3.71203e-06	7.72849e-06	4.42275e-06	7.61209e-07	3.96318e-06	6.79794e-06	7.16439e-06	4.70623e-06	3.04268e-06	3.83759e-06	3.46135e-06	3.44721e-06
326	WE(7:0/16:2)	WE(7:0_16:2)+H	WE(23:2)+H	WE	(7:0_16:2)	(7:0)	(16:2)		351.326	8.59	351.326	H43 C23 O2	0.00026445	0.000474532	0.000417624	0.000364887	0.00049767	0.000437741	0.000321216	0.000243472	0.000367903	0.000572385	0.000396188	0.000569473	0.000339783	0.00063851	0.000288407	0.000438081	0.00031384	0.000342903	0.000299237	0.000460014	0.000582677	0.000427293	0.0003827	0.0004291	0.000404149	0.000405316
327	WE(9:0/15:2)	WE(9:0_15:2)+H	WE(24:2)+H	WE	(9:0_15:2)	(9:0)	(15:2)		365.341	9.058	365.341	H45 C24 O2	0.000240598	0.000464135	0.000428758	0.000375465	0.000577042	0.000463696	0.000350175	0.000249346	0.000350789	0.000845113	0.000434512	0.000522104	0.00033609	0.000626971	0.000888391	0.000389318	0.000316544	0.000460942	0.000829679	0.00130424	0.000464872	0.000613915	0.000361422	0.000470591	0.000411839	0.000414618
328	WE(17:0/15:2)	WE(17:0_15:2)+NH4	WE(32:2)+NH4	WE	(17:0_15:2)	(17:0)	(15:2)		494.493	12.136	494.493	H64 C32 O2 N1	0.00011953	0.000419079	0.000140105	0.000588719	8.89686e-05	0.00146456	0.000356301	0.000695799	0.0012114	4.94241e-05	0.000513388	2.58732e-05	0.000745987	0.00128109	0.000692463	0.000553525	0.00154924	0.00106473	0.00054573	6.68225e-06	0.000941751	0.000740707	0.000389242	0.00011286	0.000261731	0.000254611
329	WE(13:0/21:2)	WE(13:0_21:2)+NH4	WE(34:2)+NH4	WE	(13:0_21:2)	(13:0)	(21:2)		522.524	11.446	522.524	H68 C34 O2 N1	7.79081e-05	0.000467883	8.15759e-05	9.53031e-06	0.000861647	0.000551221	0.000947674	0.0007022	0.00101947	0.00137691	0.000609602	1.29753e-05	6.40556e-06	3.18641e-06	8.60622e-06	2.70087e-05	1.27876e-05	1.46281e-05	3.04056e-06	1.12978e-05	1.33871e-05	1.13323e-05	0.000366889	0.00234485	0.00127973	0.00133049
330	WE(20:4/20:0)	WE(20:4_20:0)+H	WE(40:4)+H	WE	(20:4_20:0)	(20:4)	(20:0)		585.561	13.12	585.561	H73 C40 O2	0.000830235	0.00141447	0.00134576	0.000719447	0.000755875	0.000659699	0.000472709	0.000622138	0.00111831	0.000375982	0.000831462	0.000911888	0.000633301	0.00100111	0.000508057	0.000753866	0.000510535	0.000614304	0.000646647	0.00120615	0.00153042	0.000831627	0.00195678	0.00200358	0.00197834	0.00197957
332	CerG2GNAc1(m42:5)	CerG2GNAc1(m42:5)+HCOO	CerG2GNAc1(m42:5)+HCOO	CerG2GNAc1	(m42:5)	(m42:5)			1197.76	11.217	1197.76	C63 H109 O19 N2	0.00138734	0.00101787	0.00171993	0.000872315	0.00094877	0.000635307	0.000690619	7.67049e-05	0.00155153	0.00142604	0.00103264	0.00127755	0.000843418	0.00236266	0.000550146	0.00135959	0.000894195	0.0004961	0.00101132	0.0010945	0.000968952	0.00108584	0.000983616	0.0011604	0.00114409	0.00109604
333	LPA(12:0)	LPA(12:0)-H	LPA(12:0)-H	LPA	(12:0)	(12:0)			353.173	1.393	353.173	C15 H30 O7 N0 P1	8.12621e-05	7.48108e-05	9.20089e-05	7.65147e-05	0.000107121	8.80948e-05	6.7537e-05	7.09311e-05	0.00012537	0.000128598	9.12248e-05	0.000109833	6.57943e-05	0.000184307	6.9423e-05	8.09138e-05	8.57837e-05	4.82486e-05	7.11754e-05	8.53927e-05	8.90526e-05	8.89924e-05	9.16462e-05	9.39517e-05	8.18709e-05	8.91562e-05
334	LPC(12:0)	LPC(12:0)+HCOO	LPC(12:0)+HCOO	LPC	(12:0)	(12:0)			484.267	1.393	484.268	C21 H43 O9 N1 P1	0.000156388	0.000168251	0.000205454	0.000145608	0.000226675	0.000194954	0.00014521	0.00015264	0.000285373	0.000258116	0.000193867	0.00022756	0.000141912	0.000628336	0.000122894	0.000185292	0.000154094	9.06612e-05	0.000139704	0.000159971	0.000193936	0.000204436	0.000161957	0.000182921	0.000162233	0.000169037
335	LdMePE(12:0)	LdMePE(12:0)-H	LdMePE(12:0)-H	LdMePE	(12:0)	(12:0)			424.247	1.393	424.247	C19 H39 O7 N1 P1	0.0027703	0.00288735	0.00353429	0.00266206	0.00381904	0.00334146	0.00257646	0.00267126	0.0046199	0.00442818	0.00333103	0.00391549	0.00251288	0.00746152	0.0025082	0.00329648	0.00292481	0.00174905	0.00248243	0.00323458	0.00361881	0.00337042	0.00290585	0.00337252	0.00304461	0.00310766
336	MGDG(4:0/28:5)	MGDG(4:0_28:5)-H	MGDG(32:5)-H	MGDG	(4:0_28:5)	(4:0)	(28:5)		719.474	7.835	719.474	C41 H67 O10	8.54963e-05	0.000147729	8.89424e-05	0.000105022	0.000134203	9.80369e-05	8.57101e-05	5.44165e-05	0.00010164	0.00014322	0.000104441	0.00010505	0.000125736	0.000273857	3.07882e-05	0.000107415	4.67548e-05	5.46783e-05	5.77221e-05	0.000217846	0.000144547	0.000116439	8.41751e-05	8.95353e-05	8.45425e-05	8.60843e-05
337	MGDG(18:3/29:9)	MGDG(18:3_29:9)-H	MGDG(47:12)-H	MGDG	(18:3_29:9)	(18:3)	(29:9)		915.597	10.51	915.599	C56 H83 O10	0.0094429	0.00940605	0.0119273	0.00966159	0.0110306	0.00719769	0.00847292	0.00505886	0.0110755	0.0128288	0.00961023	0.00895811	0.00907124	0.0204615	0.00392832	0.00647677	0.00936309	0.0026641	0.0070332	0.00820286	0.0056684	0.00818275	0.00734331	0.0099191	0.00519697	0.00748646
338	MGDG(49:15)	MGDG(49:15)+HCOO	MGDG(49:15)+HCOO	MGDG	(49:15)	(49:15)			983.589	10.492	983.589	C59 H83 O12	6.02607e-05	5.95897e-05	6.82391e-05	6.82019e-05	6.64834e-05	2.20088e-05	4.90851e-05	3.375e-05	8.16417e-05	7.75425e-05	5.86803e-05	5.01533e-05	4.45707e-05	0.000106613	2.52048e-05	6.96902e-05	4.26291e-05	2.601e-05	3.97986e-05	2.81736e-05	3.21428e-05	4.64986e-05	5.3598e-05	4.20421e-05	5.11205e-05	4.89202e-05
339	MLCL(12:2/15:0/12:0)	MLCL(12:2_15:0_12:0)-H	MLCL(39:2)-H	MLCL	(12:2_15:0_12:0)	(12:2)	(15:0)	(12:0)	983.563	7.306	983.563	C48 H89 O16 P2	8.61103e-05	8.14257e-05	8.95182e-05	0.000102165	0.000149035	7.63404e-05	9.06132e-05	4.46357e-05	0.000126141	9.25031e-05	9.38487e-05	6.09457e-05	5.39653e-05	0.000142172	3.82411e-05	9.74269e-05	0.000124304	4.92791e-05	7.41015e-05	0.000143043	8.26676e-05	8.66145e-05	8.76885e-05	9.73046e-05	9.87057e-05	9.45663e-05
340	OAHFA(38:2)	OAHFA(38:2)-H	OAHFA(38:2)-H	OAHFA	(38:2)	(38:2)			589.517	7.837	589.52	C38 H69 O4	0.000181323	0.000473511	0.000207874	0.000242353	0.000337162	0.000222864	0.000206554	0.000122199	0.000268846	0.000389349	0.000265204	0.000235996	0.000323982	0.000813293	6.54763e-05	0.000281005	9.56141e-05	0.000132504	0.000127455	0.000714594	0.000396586	0.00031865	0.00019665	0.000212522	0.000209336	0.000206169
341	PA(44:11)	PA(44:11)-H	PA(44:11)-H	PA	(44:11)	(44:11)			793.481	7.84	793.481	C47 H70 O8 N0 P1	7.18722e-05	0.000147615	7.88109e-05	8.9912e-05	0.000124307	9.08323e-05	8.65793e-05	5.65602e-05	0.000106416	0.000155024	0.000100793	9.72401e-05	0.000120068	0.000236111	2.84243e-05	0.000106298	4.08376e-05	5.76772e-05	5.87616e-05	0.000201613	0.000139505	0.000108654	8.11877e-05	8.72345e-05	8.52924e-05	8.45715e-05
342	PC(16:0/18:1)	PC(16:0_18:1)+HCOO	PC(34:1)+HCOO	PC	(16:0_18:1)	(16:0)	(18:1)		804.576	11.236	804.576	C43 H83 O10 N1 P1	0.000446033	0.00013452	0.000235002	0.000178293	5.51294e-05	0.000608586	0.000560912	2.6813e-06	0.000610089	7.78672e-05	0.000290911	0.000389362	5.96011e-05	0.000241182	3.66607e-05	5.91555e-05	9.36717e-05	3.4304e-05	2.69357e-05	0.000436779	4.04843e-05	0.000141814	0.000127758	0.000169806	0.000152132	0.000149899
343	PC(18:0/18:1)	PC(18:0_18:1)+HCOO	PC(36:1)+HCOO	PC	(18:0_18:1)	(18:0)	(18:1)		832.607	11.985	832.607	C45 H87 O10 N1 P1	6.73848e-06	6.55142e-06	7.84408e-05	7.33955e-05	1.63028e-05	0.000219844	0.000205776	1.21111e-06	0.000209364	2.64218e-05	8.44045e-05	0.000112829	1.9947e-05	5.96914e-05	4.78231e-06	1.18958e-05	1.19055e-05	5.65587e-06	1.56054e-06	0.000152117	8.30135e-06	3.88685e-05	4.5341e-05	5.34506e-05	1.65444e-05	3.84453e-05
344	PC(18:1/18:1)	PC(18:1_18:1)+HCOO	PC(36:2)+HCOO	PC	(18:1_18:1)	(18:1)	(18:1)		830.592	11.327	830.592	C45 H85 O10 N1 P1	0.000232057	1.38826e-05	0.000126753	2.08572e-05	5.73646e-06	7.72678e-05	0.000272568	8.11831e-07	0.000166497	2.38384e-05	9.40268e-05	0.00011165	1.57304e-05	0.000104301	6.05284e-06	6.47967e-06	1.97124e-05	7.07213e-06	2.30438e-06	3.4497e-06	1.37832e-06	2.7813e-05	5.35737e-06	5.38848e-05	8.78426e-06	2.26755e-05
345	PC(16:0/20:4)	PC(16:0_20:4)+HCOO	PC(36:4)+HCOO	PC	(16:0_20:4)	(16:0)	(20:4)		826.56	10.577	826.56	C45 H81 O10 N1 P1	1.50092e-05	4.84392e-06	2.47857e-06	6.72965e-06	2.37776e-12	3.62201e-06	0.000144804	1.68615e-12	4.90145e-06	2.79847e-12	1.82389e-05	2.51618e-05	3.16153e-06	1.89202e-05	1.24576e-06	2.41912e-06	3.05522e-06	7.19118e-07	2.51043e-06	8.08158e-06	2.4095e-12	6.52747e-06	1.19327e-05	6.41072e-05	3.35089e-05	3.65163e-05
346	PC(18:0/20:4)	PC(18:0_20:4)+HCOO	PC(38:4)+HCOO	PC	(18:0_20:4)	(18:0)	(20:4)		854.592	11.363	854.592	C47 H85 O10 N1 P1	0.000160597	2.46137e-05	5.02746e-05	5.56603e-05	8.38345e-06	0.000209798	0.000246675	5.50439e-07	0.000123782	6.78199e-06	8.87116e-05	9.25889e-05	1.87591e-05	4.61158e-05	2.16145e-06	1.48513e-06	4.97631e-06	3.79501e-06	2.20123e-06	8.30092e-05	1.40591e-06	2.56498e-05	6.08138e-05	5.48644e-05	6.6767e-05	6.0815e-05
347	PC(18:1/20:4)	PC(18:1_20:4)+HCOO	PC(38:5)+HCOO	PC	(18:1_20:4)	(18:1)	(20:4)		852.576	10.682	852.576	C47 H83 O10 N1 P1	9.50008e-05	9.57584e-06	5.74164e-05	1.25745e-06	1.24997e-06	0.000120993	0.000148025	1.68615e-12	9.48808e-06	4.97158e-07	4.43505e-05	1.14736e-05	2.81567e-06	4.55736e-06	8.4115e-07	6.67153e-06	7.32745e-06	1.02896e-06	1.85079e-06	6.20787e-05	2.4095e-12	9.86452e-06	2.06908e-05	2.72695e-05	6.28376e-06	1.80813e-05
348	PE(18:0/16:0)	PE(18:0_16:0)-H	PE(34:0)-H	PE	(18:0_16:0)	(18:0)	(16:0)		718.539	11.137	718.539	C39 H77 O8 N1 P1	0.000419477	0.000122645	0.000273986	0.000162299	6.44573e-05	0.000651458	0.000802503	4.90183e-06	0.000665506	7.41383e-05	0.000324137	0.000646695	5.91078e-05	0.000361742	3.8788e-05	0.000108451	0.000122168	6.22314e-05	4.57051e-05	0.000646235	4.47317e-05	0.000213585	0.000136692	0.000165392	0.000146009	0.000149365
349	PE(16:0/18:1)	PE(16:0_18:1)-H	PE(34:1)-H	PE	(16:0_18:1)	(16:0)	(18:1)		716.524	10.505	716.524	C39 H75 O8 N1 P1	0.000332832	6.7144e-05	0.000102269	0.000128725	1.81474e-05	6.39027e-05	6.9227e-05	8.08432e-07	0.000378774	4.46579e-05	0.000120649	0.000317626	7.58163e-06	4.38975e-05	5.20096e-06	1.49155e-05	5.38738e-05	1.73052e-06	4.40876e-07	9.35061e-05	1.15029e-06	5.39923e-05	2.63662e-05	1.86537e-05	0.000111208	5.20761e-05
350	PE(34:1e)	PE(34:1e)-H	PE(34:1e)-H	PE	(34:1e)	(34:1e)			702.544	11.967	702.544	C39 H77 O7 N1 P1	1.45632e-05	1.92644e-12	1.0223e-06	2.37229e-07	6.64973e-07	7.85166e-07	1.50538e-05	1.68615e-12	1.08369e-05	6.84988e-07	4.38486e-06	4.46626e-05	1.42821e-12	4.70609e-12	2.036e-12	1.05572e-06	2.33628e-06	1.53909e-12	1.75533e-12	0.000145816	2.4095e-12	1.93871e-05	1.21125e-06	8.53571e-07	1.87853e-06	1.31445e-06
351	PE(36:1e)	PE(36:1e)-H	PE(36:1e)-H	PE	(36:1e)	(36:1e)			730.576	11.699	730.576	C41 H81 O7 N1 P1	4.44324e-05	5.70803e-06	1.83679e-05	1.05906e-05	1.03932e-05	7.71487e-05	5.7258e-06	1.68615e-12	8.33692e-05	4.43883e-06	2.60175e-05	0.000123502	2.64386e-06	4.10992e-06	5.4044e-06	2.34983e-05	7.48305e-06	1.62302e-05	1.90595e-06	0.000295742	2.4095e-12	4.8052e-05	6.50977e-06	1.34618e-06	2.38403e-05	1.05654e-05
352	PE(18:1/18:1)	PE(18:1_18:1)-H	PE(36:2)-H	PE	(18:1_18:1)	(18:1)	(18:1)		742.539	11.543	742.539	C41 H77 O8 N1 P1	2.91166e-05	1.48682e-05	9.31568e-05	2.34111e-05	1.0048e-05	0.000106545	9.77232e-05	7.04131e-07	7.86968e-05	6.28038e-06	4.6055e-05	0.000101005	6.07102e-06	3.42372e-05	1.08892e-05	2.23272e-06	2.90498e-05	1.18974e-06	4.6646e-06	0.00012362	9.09771e-07	3.13869e-05	2.43349e-05	2.59872e-05	2.61288e-05	2.54836e-05
353	PE(18:1e/18:1)	PE(18:1e_18:1)-H	PE(36:2e)-H	PE	(18:1e_18:1)	(18:1e)	(18:1)		728.56	12.033	728.56	C41 H79 O7 N1 P1	5.1702e-05	5.56328e-07	8.31045e-07	6.49212e-07	2.37776e-12	1.49471e-05	3.34491e-05	1.68615e-12	1.30989e-05	2.79847e-12	1.15234e-05	7.27765e-05	1.42821e-12	2.35304e-12	4.69811e-06	7.84911e-06	5.84994e-07	4.46188e-07	1.75533e-12	0.000312272	2.4095e-12	3.98627e-05	8.46742e-06	9.17746e-06	4.89549e-06	7.51346e-06
354	PE(36:3e)	PE(36:3e)-H	PE(36:3e)-H	PE	(36:3e)	(36:3e)			726.544	11.941	726.544	C41 H77 O7 N1 P1	1.51087e-05	1.55835e-06	1.84823e-05	2.2815e-06	7.94514e-07	1.48394e-05	4.85393e-05	1.68615e-12	1.6974e-05	2.79847e-12	1.18578e-05	9.27933e-06	1.42821e-12	8.63441e-06	2.497e-06	8.60964e-07	2.63379e-06	3.88445e-07	5.79586e-07	0.000182868	8.51466e-07	2.08593e-05	1.49606e-06	3.45804e-06	2.66205e-06	2.53872e-06
355	PE(16:0/20:4)	PE(16:0_20:4)-H	PE(36:4)-H	PE	(16:0_20:4)	(16:0)	(20:4)		738.508	10.825	738.508	C41 H73 O8 N1 P1	1.51288e-06	1.92644e-12	2.41875e-05	5.22236e-06	2.37776e-12	5.20258e-05	6.48094e-05	1.68615e-12	8.36347e-06	8.91081e-07	1.57013e-05	1.91242e-06	1.42821e-12	8.29876e-06	2.036e-12	2.09641e-12	4.77599e-06	1.53909e-12	1.90547e-06	3.01346e-05	2.4095e-12	4.70272e-06	3.00195e-06	7.23675e-06	3.22435e-06	4.48768e-06
356	PE(16:1e/20:4)	PE(16:1e_20:4)-H	PE(36:5e)-H	PE	(16:1e_20:4)	(16:1e)	(20:4)		722.513	11.23	722.513	C41 H73 O7 N1 P1	0.000178514	8.47069e-06	9.56171e-05	9.73154e-06	2.37776e-12	7.1125e-05	0.000364289	8.66358e-07	0.000269272	1.32389e-06	9.99209e-05	0.000214461	7.27526e-06	0.000114889	7.30411e-06	2.76301e-06	3.27335e-05	2.94476e-07	1.22274e-06	0.000194377	2.4095e-12	5.7532e-05	3.38217e-05	5.17819e-05	6.67554e-06	3.07597e-05
357	PE(36:5e)	PE(36:5e)-H	PE(36:5e)-H	PE	(36:5e)	(36:5e)			722.513	11.304	722.513	C41 H73 O7 N1 P1	3.95456e-05	1.08843e-05	2.58131e-05	1.28417e-05	2.37776e-12	0.0002163	0.000211862	3.72836e-07	0.000108073	1.32389e-06	6.27017e-05	5.22545e-05	8.28466e-06	9.02621e-05	1.25767e-06	2.11423e-06	1.58642e-05	6.78091e-07	5.25895e-07	3.57286e-05	2.4095e-12	2.0697e-05	1.77928e-05	2.73126e-05	1.11907e-05	1.87654e-05
358	PE(38:2)	PE(38:2)-H	PE(38:2)-H	PE	(38:2)	(38:2)			770.571	11.358	770.571	C43 H81 O8 N1 P1	0.000714044	0.000211647	0.000428036	0.000293121	9.29196e-05	0.000956183	0.000908443	1.61026e-05	0.00122012	0.000137851	0.000497847	0.000556241	9.99248e-05	0.000373742	8.55406e-05	8.54811e-05	0.000143637	4.57309e-05	5.58013e-05	0.000937206	7.20147e-05	0.000245532	0.000326887	0.00038831	0.000105908	0.000273702
359	PE(18:0/20:3)	PE(18:0_20:3)-H	PE(38:3)-H	PE	(18:0_20:3)	(18:0)	(20:3)		768.555	10.829	768.555	C43 H79 O8 N1 P1	7.18886e-05	5.59065e-06	4.9655e-06	5.80938e-06	2.70644e-06	1.05213e-05	1.7647e-05	1.68615e-12	1.57463e-05	1.83569e-06	1.36711e-05	8.41147e-06	1.3852e-06	4.86534e-05	6.54206e-07	1.42882e-06	1.43515e-06	1.42478e-06	2.15984e-06	1.4547e-05	2.22686e-06	8.23267e-06	1.97098e-05	3.42249e-05	2.14734e-05	2.5136e-05
360	PE(18:0/20:4)	PE(18:0_20:4)-H	PE(38:4)-H	PE	(18:0_20:4)	(18:0)	(20:4)		766.539	11.578	766.539	C43 H77 O8 N1 P1	0.000484423	4.75321e-05	0.000319016	9.49575e-05	5.21176e-05	0.00049823	0.000766104	3.66862e-06	0.000630079	5.25593e-05	0.000294869	0.000322508	5.42556e-05	0.000201562	2.30249e-05	3.97554e-05	0.00010745	2.34224e-05	2.30569e-05	0.000366699	1.28124e-05	0.000117455	9.34991e-05	0.000118997	0.000108988	0.000107161
361	PE(18:0/20:4)	PE(18:0_20:4)-H	PE(38:4)-H	PE	(18:0_20:4)	(18:0)	(20:4)		766.539	11.669	766.539	C43 H77 O8 N1 P1	0.000484423	6.80817e-06	0.000148904	1.45617e-05	5.21176e-05	0.000206433	0.00032175	3.66862e-06	0.000284306	8.45049e-06	0.000153142	5.11608e-05	1.27875e-05	5.26467e-05	3.98036e-06	1.25633e-05	1.94268e-05	2.34224e-05	1.26753e-06	6.62967e-05	7.70125e-07	2.44322e-05	4.4894e-05	1.82221e-05	2.67583e-05	2.99581e-05
362	PE(18:0e/20:4)	PE(18:0e_20:4)-H	PE(38:4e)-H	PE	(18:0e_20:4)	(18:0e)	(20:4)		752.56	12.157	752.56	C43 H79 O7 N1 P1	8.66543e-05	7.24107e-06	3.85279e-06	1.52293e-05	1.61124e-05	5.91245e-05	5.21116e-05	1.68615e-12	0.000513847	2.79967e-06	7.56972e-05	6.27642e-06	1.21287e-06	5.07235e-06	7.13856e-06	3.71501e-06	7.09814e-06	1.42746e-06	5.1348e-06	1.31535e-05	5.64348e-07	5.07935e-06	3.97885e-05	7.01249e-06	8.14503e-06	1.83153e-05
363	PE(18:1/20:4)	PE(18:1_20:4)-H	PE(38:5)-H	PE	(18:1_20:4)	(18:1)	(20:4)		764.524	10.901	764.524	C43 H75 O8 N1 P1	5.72875e-05	3.73483e-06	5.97953e-05	1.02258e-05	3.69602e-06	0.000101395	5.63822e-05	1.68615e-12	0.000110919	4.69469e-06	4.0813e-05	1.78002e-05	4.43016e-06	2.92872e-05	2.51241e-06	1.61698e-06	1.00757e-05	1.53909e-12	2.03455e-06	6.96797e-05	2.4095e-12	1.37437e-05	1.55366e-05	5.0362e-06	7.09731e-06	9.22338e-06
364	PE(18:1e/20:4)	PE(18:1e_20:4)-H	PE(38:5e)-H	PE	(18:1e_20:4)	(18:1e)	(20:4)		750.544	12.023	750.544	C43 H77 O7 N1 P1	0.000840955	4.81555e-05	0.0004347	1.49864e-05	3.91768e-05	0.000945232	0.000996882	9.0959e-06	0.000841709	2.08329e-05	0.000419173	0.00067563	6.49618e-05	0.000197756	1.53429e-05	2.78461e-05	8.03047e-05	3.75789e-06	1.32919e-05	3.37082e-05	1.61701e-06	0.000111422	0.000134222	0.000163048	0.000153932	0.000150401
365	PE(18:2e/20:4)	PE(18:2e_20:4)-H	PE(38:6e)-H	PE	(18:2e_20:4)	(18:2e)	(20:4)		748.529	11.3	748.529	C43 H75 O7 N1 P1	0.000660164	6.24503e-05	0.000301243	6.11374e-05	1.18767e-05	0.000656642	0.00115971	2.03518e-06	0.000906468	4.8223e-05	0.000386995	0.000591681	4.43424e-05	0.000323606	6.19046e-05	4.18411e-05	0.000155521	1.68148e-05	8.93465e-06	0.000776977	1.18221e-05	0.000203344	0.000123319	0.000148668	0.000141078	0.000137688
366	PE(40:5e)	PE(40:5e)-H	PE(40:5e)-H	PE	(40:5e)	(40:5e)			778.576	11.15	778.576	C45 H81 O7 N1 P1	0.000136212	2.90319e-05	5.1146e-05	6.97998e-05	1.84712e-05	0.000160358	0.000126536	1.68615e-12	0.00032074	9.10725e-06	9.21403e-05	0.000130083	5.12453e-06	1.53942e-05	8.38081e-06	6.90852e-05	2.10634e-05	2.63129e-05	6.18127e-06	0.000192682	2.4095e-12	4.74308e-05	2.12905e-05	2.99832e-05	2.60329e-05	2.57688e-05
367	PG(16:0/17:0)	PG(16:0_17:0)-H	PG(33:0)-H	PG	(16:0_17:0)	(16:0)	(17:0)		735.52	5.702	735.518	C39 H76 O10 N0 P1	8.11166e-05	0.000148112	7.80059e-05	0.000164292	0.000152574	0.000111872	8.81404e-05	6.74796e-05	7.20269e-05	0.00017533	0.000113895	5.37908e-05	0.000117723	0.000233807	1.95961e-05	6.16186e-05	5.67045e-05	8.28675e-05	6.94693e-05	0.000183352	0.000137505	0.000101643	8.11744e-05	9.88016e-05	9.78145e-05	9.25968e-05
368	PG(16:0/18:1)	PG(16:0_18:1)-H	PG(34:1)-H	PG	(16:0_18:1)	(16:0)	(18:1)		747.518	10.663	747.518	C40 H76 O10 N0 P1	1.20179e-05	1.5804e-06	3.50844e-05	1.66062e-06	7.1895e-06	5.13344e-05	7.23346e-05	1.68615e-12	4.76479e-05	3.50696e-06	2.32357e-05	5.89235e-05	1.67712e-06	1.91289e-06	7.64816e-07	7.78292e-06	2.41842e-06	1.05934e-06	1.75533e-12	3.23789e-06	2.4095e-12	7.77769e-06	2.61666e-06	3.47046e-06	3.05095e-06	3.04603e-06
369	PG(37:0)	PG(37:0)-H	PG(37:0)-H	PG	(37:0)	(37:0)			791.582	7.293	791.581	C43 H84 O10 N0 P1	5.78805e-05	0.000163789	4.82905e-05	0.000159021	0.000182998	0.000106949	8.43637e-05	6.47558e-05	4.1842e-05	0.000185841	0.000109573	3.1783e-05	0.00013352	0.000175044	1.39941e-05	4.38508e-05	3.60815e-05	7.49484e-05	6.29308e-05	0.000177548	0.000128824	8.78524e-05	7.41455e-05	8.5775e-05	7.86149e-05	7.95118e-05
370	PI(18:0/18:3)	PI(18:0_18:3)-H	PI(36:3)-H	PI	(18:0_18:3)	(18:0)	(18:3)		859.534	7.221	859.534	C45 H80 O13 N0 P1	0.000219354	0.000182806	0.00026526	0.000157613	0.000151768	7.93716e-05	0.000144526	7.98346e-05	0.00024285	0.000158533	0.000168191	0.000175302	0.000184473	0.000458329	0.000109841	0.000284122	0.000129004	5.84146e-05	0.000166	0.000105807	9.04162e-05	0.000176171	0.000150331	0.000178813	0.000170012	0.000166385
371	PI(18:0/20:4)	PI(18:0_20:4)-H	PI(38:4)-H	PI	(18:0_20:4)	(18:0)	(20:4)		885.549	10.596	885.55	C47 H82 O13 N0 P1	0.000698493	2.64208e-06	0.000504283	6.72246e-05	5.49766e-05	0.000623847	0.000147484	1.37664e-06	0.000583755	3.21468e-06	0.00026873	0.000434072	4.97637e-05	0.000157773	2.66843e-05	7.28175e-05	7.49539e-05	3.33979e-05	2.06893e-05	2.95086e-05	5.41254e-05	9.53786e-05	0.000165849	0.000186369	0.000176738	0.000176319
372	PI(18:1/20:4)	PI(18:1_20:4)-H	PI(38:5)-H	PI	(18:1_20:4)	(18:1)	(20:4)		883.534	9.912	883.534	C47 H80 O13 N0 P1	0.000134561	7.04301e-06	9.4231e-05	2.93881e-06	8.82954e-07	0.000104963	6.45731e-06	1.68615e-12	1.47457e-05	4.96467e-07	3.6632e-05	6.90361e-05	3.99109e-06	7.98393e-06	2.036e-12	1.90283e-06	9.96548e-06	1.53909e-12	9.87616e-07	2.71983e-06	3.87199e-07	9.69741e-06	6.57432e-06	1.25849e-05	2.05111e-06	7.07013e-06
373	PI(22:0/18:3)	PI(22:0_18:3)-H	PI(40:3)-H	PI	(22:0_18:3)	(22:0)	(18:3)		915.598	8.816	915.597	C49 H88 O13 N0 P1	0.01145	0.00940477	0.0120163	0.00929877	0.00966737	0.00531092	0.00769185	0.00530284	0.0150079	0.0115198	0.00966704	0.00974753	0.00478818	0.025174	0.00532962	0.0134118	0.00853336	0.00459837	0.00950791	0.0091492	0.00800585	0.00982459	0.00909465	0.00512779	0.0106663	0.00829625
374	PI(20:2/20:2)	PI(20:2_20:2)-H	PI(40:4)-H	PI	(20:2_20:2)	(20:2)	(20:2)		913.581	7.808	913.581	C49 H86 O13 N0 P1	0.000304462	0.000343346	0.000170809	0.000283144	0.000256441	0.000173939	0.000291998	0.000126832	0.000407777	0.00025966	0.000261841	0.000131435	0.000363751	0.000402837	0.000134137	0.000299007	0.000135579	0.000116916	0.000225831	0.000129566	0.000129006	0.000206807	0.000158078	0.000252832	0.000201673	0.000204194
375	cPA(12:0)	cPA(12:0)-H	cPA(12:0)-H	cPA	(12:0)	(12:0)			335.162	1.397	335.163	C15 H28 O6 N0 P1	0.000126427	0.000126951	0.000162518	0.000123235	0.000187738	0.000153935	0.000107002	0.000120125	0.000198982	0.000201431	0.000150834	0.00016734	0.000108052	0.000250955	0.000108762	0.000133167	0.000145987	9.22687e-05	0.000116604	0.000146801	0.000153322	0.000142326	0.000128843	0.000156129	0.000128785	0.000137919
376	dMePE(16:0/14:0)	dMePE(16:0_14:0)-H	dMePE(30:0)-H	dMePE	(16:0_14:0)	(16:0)	(14:0)		690.508	10.303	690.508	C37 H73 O8 N1 P1	6.39096e-05	1.83557e-05	3.29626e-05	2.71452e-05	1.82301e-06	9.33921e-05	0.000183469	1.68615e-12	4.94022e-05	4.16979e-06	4.74629e-05	0.00012712	4.72695e-06	2.77654e-05	1.14015e-05	1.57141e-06	4.53531e-06	2.91123e-06	9.23211e-06	4.94157e-05	2.34591e-06	2.41026e-05	2.42016e-05	2.63485e-05	9.67835e-06	2.00762e-05
377	dMePE(16:0/16:0)	dMePE(16:0_16:0)-H	dMePE(32:0)-H	dMePE	(16:0_16:0)	(16:0)	(16:0)		718.54	11.137	718.539	C39 H77 O8 N1 P1	0.000419478	0.00012265	0.000273988	0.000162297	6.44557e-05	0.000630711	0.000803871	4.90119e-06	0.000610677	7.41381e-05	0.000316716	0.000648178	5.91059e-05	0.000361746	3.87882e-05	0.000108451	0.000122166	6.22318e-05	4.57025e-05	0.000646237	4.47315e-05	0.000213734	0.000136693	0.000165393	0.000146012	0.000149366
378	dMePE(16:0/16:1)	dMePE(16:0_16:1)-H	dMePE(32:1)-H	dMePE	(16:0_16:1)	(16:0)	(16:1)		716.524	10.478	716.524	C39 H75 O8 N1 P1	4.7627e-05	1.01775e-05	0.000238722	2.5332e-06	5.30312e-06	0.00033834	0.000472813	1.86545e-06	0.00013089	4.48533e-05	0.000129312	0.000151489	2.95916e-05	2.53321e-05	2.88438e-05	1.12853e-05	2.28861e-05	1.99985e-05	1.49787e-05	0.00067014	3.82822e-06	9.78373e-05	2.83174e-05	3.2493e-05	3.58e-06	2.14635e-05
379	dMePE(18:0/16:0)	dMePE(18:0_16:0)-H	dMePE(34:0)-H	dMePE	(18:0_16:0)	(18:0)	(16:0)		746.571	11.878	746.571	C41 H81 O8 N1 P1	0.000126358	2.32544e-05	9.48554e-05	5.71341e-05	2.74845e-05	0.000162801	0.000198823	7.56377e-07	0.000185484	2.59817e-05	9.02932e-05	0.000106354	1.07714e-06	5.59136e-05	8.31398e-06	2.46786e-05	2.66665e-05	1.11849e-05	4.66694e-06	0.000155106	1.02159e-05	4.04178e-05	4.54729e-05	4.553e-05	4.01065e-05	4.37031e-05
380	dMePE(16:0/18:1)	dMePE(16:0_18:1)-H	dMePE(34:1)-H	dMePE	(16:0_18:1)	(16:0)	(18:1)		744.555	11.225	744.555	C41 H79 O8 N1 P1	0.00184607	0.000519428	0.00102598	0.000745678	0.000299011	0.002578	0.00146197	4.90541e-05	0.00250241	0.0004084	0.0011436	0.00177512	0.000106015	0.00109198	0.000176424	0.000276263	0.000365807	0.00015699	0.00015813	0.00197025	0.000142556	0.000621953	0.000584986	0.000789441	0.000635097	0.000669841
381	dMePE(16:0/18:2)	dMePE(16:0_18:2)-H	dMePE(34:2)-H	dMePE	(16:0_18:2)	(16:0)	(18:2)		742.539	10.633	742.539	C41 H77 O8 N1 P1	0.00023969	7.44945e-05	0.000173217	0.00011821	2.40816e-05	0.000380782	0.000344865	8.92175e-07	0.000399771	4.35613e-05	0.000179957	0.000210324	2.58759e-05	0.000192988	2.43773e-05	9.20818e-06	5.70515e-05	1.32395e-05	5.67127e-06	0.000428823	2.19288e-05	9.89487e-05	0.000120322	0.000150236	0.000418367	0.000229642
382	dMePE(34:2e)	dMePE(34:2e)-H	dMePE(34:2e)-H	dMePE	(34:2e)	(34:2e)			728.56	12.033	728.56	C41 H79 O7 N1 P1	5.1702e-05	5.56328e-07	8.31045e-07	6.49212e-07	2.37776e-12	1.49471e-05	3.34491e-05	1.68615e-12	1.30989e-05	2.79847e-12	1.15234e-05	7.27765e-05	1.42821e-12	2.35304e-12	4.69811e-06	7.84911e-06	5.84994e-07	4.46188e-07	1.75533e-12	0.000312272	2.4095e-12	3.98627e-05	8.46742e-06	9.17746e-06	4.89549e-06	7.51346e-06
383	dMePE(34:5e)	dMePE(34:5e)-H	dMePE(34:5e)-H	dMePE	(34:5e)	(34:5e)			722.513	11.262	722.513	C41 H73 O7 N1 P1	4.69897e-05	1.08841e-05	1.83506e-05	1.28417e-05	2.37776e-12	0.0002163	0.000104825	7.28724e-07	0.00016389	1.60761e-06	5.76418e-05	6.79125e-05	8.28661e-06	0.000134116	1.25767e-06	2.85179e-06	4.8761e-05	6.79419e-07	1.02789e-06	1.11865e-05	2.4095e-12	2.76079e-05	8.9692e-06	5.0783e-06	4.517e-05	1.97392e-05
384	dMePE(17:0/18:1)	dMePE(17:0_18:1)-H	dMePE(35:1)-H	dMePE	(17:0_18:1)	(17:0)	(18:1)		758.571	11.569	758.571	C42 H81 O8 N1 P1	2.67434e-05	6.2861e-06	4.57844e-05	9.84607e-06	6.81772e-07	3.7325e-05	0.000116782	1.68615e-12	3.91008e-05	6.87986e-06	2.89429e-05	2.23025e-05	3.45195e-06	5.89495e-05	2.1185e-05	2.36683e-06	1.80281e-06	6.75879e-07	1.75533e-12	8.81627e-05	1.19806e-06	2.00095e-05	1.60936e-05	3.40407e-06	6.22744e-06	8.57503e-06
385	dMePE(18:0/18:1)	dMePE(18:0_18:1)-H	dMePE(36:1)-H	dMePE	(18:0_18:1)	(18:0)	(18:1)		772.586	11.997	772.586	C43 H83 O8 N1 P1	0.000492631	0.000142394	0.000242549	0.000241652	8.24106e-05	0.000680006	0.000700055	1.08832e-05	0.000673842	9.34342e-05	0.000335986	0.000367354	7.49451e-05	0.000209076	5.1791e-05	5.88796e-05	7.80868e-05	3.59552e-05	3.07778e-05	0.000489729	4.63844e-05	0.000144298	0.000146858	0.000189669	0.000156162	0.00016423
386	dMePE(18:0/18:1)	dMePE(18:0_18:1)-H	dMePE(36:1)-H	dMePE	(18:0_18:1)	(18:0)	(18:1)		772.586	12.101	772.586	C43 H83 O8 N1 P1	3.59638e-05	1.10094e-05	2.5968e-05	1.67691e-05	8.39236e-06	7.84875e-05	9.89691e-05	1.29773e-06	0.000123545	8.41775e-06	4.0882e-05	6.6206e-05	1.76153e-05	3.3674e-05	5.14924e-06	1.19571e-05	1.6196e-05	2.43027e-06	5.02403e-06	7.59065e-05	7.01368e-06	2.41172e-05	3.39704e-05	3.77487e-05	2.81822e-05	3.33004e-05
387	dMePE(18:1/18:1)	dMePE(18:1_18:1)-H	dMePE(36:2)-H	dMePE	(18:1_18:1)	(18:1)	(18:1)		770.57	11.359	770.571	C43 H81 O8 N1 P1	0.000713666	0.000211647	0.000428032	0.00029312	9.29216e-05	0.000956142	0.00090688	1.61037e-05	0.00121691	0.000137858	0.000497328	0.00055624	9.99272e-05	0.000373741	8.55425e-05	8.54826e-05	0.000143637	4.57313e-05	5.58038e-05	0.000931016	7.30127e-05	0.000245013	0.000326887	0.000388308	0.000356401	0.000357198
388	dMePE(18:1/18:2)	dMePE(18:1_18:2)-H	dMePE(36:3)-H	dMePE	(18:1_18:2)	(18:1)	(18:2)		768.555	10.841	768.555	C43 H79 O8 N1 P1	9.04507e-05	1.78114e-06	2.25199e-05	1.55767e-05	2.45135e-06	1.91685e-05	1.57839e-05	1.68615e-12	1.57463e-05	1.05863e-06	1.84537e-05	1.94655e-05	2.87287e-06	4.86536e-05	6.54721e-07	1.42882e-06	4.27157e-07	1.42478e-06	2.16008e-06	1.28971e-05	1.45924e-06	9.14439e-06	2.03425e-05	1.61712e-05	2.31544e-05	1.98894e-05
389	dMePE(16:0/20:4)	dMePE(16:0_20:4)-H	dMePE(36:4)-H	dMePE	(16:0_20:4)	(16:0)	(20:4)		766.539	10.56	766.539	C43 H77 O8 N1 P1	0.000394875	8.43802e-05	0.000201918	0.000169424	2.55106e-06	0.000580785	0.000654684	9.52177e-07	0.000385551	5.8673e-05	0.000253379	0.000377439	5.19585e-05	0.000204045	2.20703e-05	5.35115e-05	7.56093e-05	4.28639e-05	4.06519e-05	0.000260987	8.44469e-06	0.000113758	0.000236664	0.000262413	0.000260437	0.000253171
390	dMePE(18:0/20:4)	dMePE(18:0_20:4)-H	dMePE(38:4)-H	dMePE	(18:0_20:4)	(18:0)	(20:4)		794.57	11.349	794.571	C45 H81 O8 N1 P1	0.00048854	0.000108491	4.53904e-05	0.000195446	2.75223e-05	0.000485483	0.000761208	1.59951e-06	0.000270999	4.17923e-05	0.000242647	0.000370238	5.20021e-05	0.000168613	2.95295e-05	3.92895e-05	3.5273e-05	3.02315e-05	2.99803e-05	0.00027383	2.62022e-05	0.000105519	0.000210756	8.39949e-05	0.00021328	0.000169344
391	dMePE(18:1/20:4)	dMePE(18:1_20:4)-H	dMePE(38:5)-H	dMePE	(18:1_20:4)	(18:1)	(20:4)		792.555	10.661	792.555	C45 H79 O8 N1 P1	0.000318917	7.91684e-05	0.000195626	0.000120983	3.93453e-05	0.000421299	0.000511614	1.60178e-06	0.000326958	4.89452e-05	0.000206446	0.000193043	4.36162e-05	0.000144655	1.01858e-05	3.79777e-05	4.82743e-05	1.94766e-05	3.97835e-05	0.000256354	1.43174e-05	8.07683e-05	9.02266e-05	0.000101335	2.66903e-05	7.27508e-05
392	dMePE(38:5e)	dMePE(38:5e)-H	dMePE(38:5e)-H	dMePE	(38:5e)	(38:5e)			778.576	11.149	778.576	C45 H81 O7 N1 P1	0.000136212	2.90319e-05	5.1146e-05	6.97998e-05	1.84712e-05	0.000160358	0.000126536	1.68615e-12	0.00032074	9.10725e-06	9.21403e-05	0.000130083	5.12453e-06	1.53942e-05	8.38081e-06	6.90852e-05	2.10634e-05	2.63129e-05	6.18127e-06	0.000192682	2.4095e-12	4.74308e-05	2.12905e-05	2.99832e-05	2.60329e-05	2.57688e-05
393	dMePE(38:6e)	dMePE(38:6e)-H	dMePE(38:6e)-H	dMePE	(38:6e)	(38:6e)			776.56	11.017	776.56	C45 H79 O7 N1 P1	7.53978e-05	4.2351e-05	1.14172e-05	9.38826e-06	2.37776e-12	0.000105541	9.77164e-05	1.68615e-12	0.000173656	2.34123e-06	5.17809e-05	9.96896e-05	4.35328e-06	6.19243e-05	2.07979e-06	1.1527e-05	9.67424e-06	8.26937e-06	1.75533e-12	0.000148307	4.58659e-06	3.50411e-05	2.14565e-05	2.28942e-05	2.59988e-05	2.34498e-05
394	phSM(d32:1)	phSM(d32:1)+HCOO	phSM(d32:1)+HCOO	phSM	(d32:1)	(d32:1)			735.529	5.701	735.529	C38 H76 O9 N2 P1	5.44107e-05	0.000102019	5.09754e-05	0.00011364	0.000102205	7.93873e-05	5.87648e-05	4.69607e-05	4.74837e-05	0.000116383	7.72229e-05	3.43631e-05	7.76475e-05	0.000158375	1.31801e-05	3.84102e-05	3.59502e-05	5.44531e-05	4.61484e-05	0.00012183	8.96475e-05	6.70004e-05	5.35303e-05	6.56685e-05	6.5916e-05	6.17049e-05
395	PIP(18:1/21:1)	PIP(18:1_21:1)-H	PIP(39:2)-H	PIP	(18:1_21:1)	(18:1)	(21:1)		983.563	7.307	983.563	C48 H89 O16 N0 P2	8.61009e-05	8.14134e-05	8.95141e-05	0.000102156	0.000149038	7.6334e-05	9.06092e-05	4.46389e-05	0.000126125	9.24969e-05	9.38426e-05	6.09422e-05	5.39598e-05	0.000142172	3.82403e-05	9.74233e-05	0.0001243	4.92778e-05	7.41029e-05	0.000143047	8.26587e-05	8.66124e-05	8.76859e-05	9.73046e-05	9.87054e-05	9.45653e-05
396	PS(38:3)	PS(38:3)-H	PS(38:3)-H	PS	(38:3)	(38:3)			812.545	12.271	812.545	C44 H79 O10 N1 P1	3.02426e-05	1.18139e-06	1.76199e-05	1.81916e-12	8.18537e-07	4.30817e-05	6.71329e-05	1.68615e-12	5.76839e-05	2.79847e-12	2.17761e-05	2.06384e-05	9.06419e-07	4.55249e-06	8.75053e-07	2.09641e-12	1.02464e-06	1.53909e-12	1.75533e-12	2.25916e-06	2.4095e-12	3.02562e-06	1.65777e-06	3.1561e-06	2.87482e-06	2.5629e-06
397	PS(40:8e)	PS(40:8e)-H	PS(40:8e)-H	PS	(40:8e)	(40:8e)			816.519	11.308	816.518	C46 H75 O9 N1 P1	0.00021844	1.65193e-05	0.000102007	1.3726e-05	2.37776e-12	0.000152664	0.000359969	1.68615e-12	0.000271971	2.35059e-06	0.000113765	0.000219552	1.39495e-05	4.1434e-05	6.20593e-06	2.94671e-06	5.44406e-05	2.70921e-06	1.75533e-12	1.26056e-05	2.4095e-12	3.53844e-05	4.09965e-05	4.45e-05	4.42459e-05	4.32475e-05
398	SM(d42:1)	SM(d42:1)+HCOO	SM(d42:1)+HCOO	SM	(d42:1)	(d42:1)			859.691	13.225	859.691	C48 H96 O8 N2 P1	6.28624e-06	2.09143e-06	2.32831e-12	4.30082e-06	1.0197e-06	2.39005e-06	3.975e-06	1.68615e-12	1.90234e-06	8.68383e-07	2.2834e-06	4.24932e-06	1.42821e-12	7.6415e-07	2.036e-12	4.94858e-07	1.94335e-12	1.53909e-12	1.75533e-12	0.000105302	2.4095e-12	1.1081e-05	1.02321e-06	2.53886e-06	1.72618e-06	1.76275e-06
399	SPHP(d15:0)	SPHP(d15:0)-H	SPHP(d15:0)-H	SPHP	(d15:0)	(d15:0)			338.21	3.009	338.21	C15 H33 O5 N1 P1	3.40201e-05	5.32091e-05	6.25848e-05	5.211e-05	6.61469e-05	6.391e-05	4.48802e-05	5.96439e-05	8.146e-05	7.65855e-05	5.94551e-05	7.3077e-05	5.00427e-05	0.000105553	3.8834e-05	7.34406e-05	4.90609e-05	4.50262e-05	4.83549e-05	8.37757e-05	6.64831e-05	6.33648e-05	2.76124e-05	3.01552e-05	2.77811e-05	2.85162e-05
400	SPHP(d16:0)	SPHP(d16:0)+HCOO	SPHP(d16:0)+HCOO	SPHP	(d16:0)	(d16:0)			398.231	2.266	398.231	C17 H37 O7 N1 P1	2.61031e-05	5.44506e-05	8.36744e-05	5.36871e-05	6.82204e-05	7.11968e-05	3.96917e-05	4.89196e-05	7.77252e-05	8.02979e-05	6.03967e-05	8.39088e-05	5.66376e-05	7.56602e-05	5.07497e-05	7.63608e-05	4.53027e-05	3.80346e-05	5.30225e-05	7.46653e-05	6.55324e-05	6.19875e-05	2.85903e-05	3.53229e-05	3.06097e-05	3.15076e-05
401	SPHP(d18:0)	SPHP(d18:0)+HCOO	SPHP(d18:0)+HCOO	SPHP	(d18:0)	(d18:0)			426.263	3.529	426.263	C19 H41 O7 N1 P1	2.23379e-05	4.09929e-05	5.29241e-05	4.36201e-05	5.11403e-05	4.98014e-05	2.72003e-05	3.78638e-05	5.76755e-05	5.18635e-05	4.3542e-05	5.83673e-05	3.56432e-05	6.24832e-05	2.9756e-05	4.85044e-05	3.27451e-05	2.44307e-05	3.42095e-05	5.48767e-05	4.51116e-05	4.26128e-05	1.18484e-05	1.41499e-05	1.30852e-05	1.30278e-05
402	SPHP(t17:0)	SPHP(t17:0)-H	SPHP(t17:0)-H	SPHP	(t17:0)	(t17:0)			382.236	3.337	382.236	C17 H37 O6 N1 P1	3.56774e-05	5.07404e-05	7.26865e-05	5.94457e-05	6.82496e-05	7.42199e-05	4.09812e-05	5.70827e-05	7.9983e-05	7.77645e-05	6.16831e-05	8.00421e-05	5.06323e-05	9.52791e-05	4.20616e-05	7.85833e-05	4.50276e-05	3.78988e-05	5.43702e-05	7.54563e-05	6.40464e-05	6.23398e-05	1.77396e-05	2.01868e-05	2.23117e-05	2.00794e-05
403	SPHP(t18:0)	SPHP(t18:0)+HCOO	SPHP(t18:0)+HCOO	SPHP	(t18:0)	(t18:0)			442.258	2.351	442.258	C19 H41 O8 N1 P1	1.49511e-05	2.88976e-05	5.54674e-05	2.80909e-05	4.27064e-05	3.96563e-05	1.9139e-05	2.72529e-05	4.60514e-05	4.22455e-05	3.44459e-05	4.97101e-05	3.33955e-05	3.25284e-05	3.39215e-05	4.13197e-05	2.05438e-05	1.99471e-05	2.83322e-05	3.79992e-05	3.58353e-05	3.33533e-05	1.61147e-05	2.01704e-05	1.75948e-05	1.796e-05
